# Supplementary material
Source: publisher site journal article supplement (https://www.dovepress.com/get_supplementary_file.php?f=387590.xlsx)
Supplement: Supplementary file 1 [file get_supplementary_file.php]

## Sheet: Sheet1
UniProt IDs	Gene Names	Protein Names	Log10_LFQ Intensity 4H Control_BR1	Log10_LFQ Intensity 4H Control_BR2	Log10_LFQ Intensity 4H Control_BR3	Log10_LFQ Intensity 4H Treatment_BR1	Log10_LFQ Intensity 4H Treatment_BR2	Log10_LFQ Intensity 4H Treatment_BR3	Log10_LFQ Intensity 8H Control_BR1	Log10_LFQ Intensity 8H Control_BR2	Log10_LFQ Intensity 8H Control_BR3	Log10_LFQ Intensity 8H Treatment_BR1	Log10_LFQ Intensity 8H Treatment_BR2	Log10_LFQ Intensity 8H Treatment_BR3	Log10_LFQ Intensity 24H Control_BR1	Log10_LFQ Intensity 24H Control_BR2	Log10_LFQ Intensity 24H Control_BR3	Log10_LFQ Intensity 24H Treatment_BR1	Log10_LFQ Intensity 24H Treatment_BR2	Log10_LFQ Intensity 24H Treatment_BR3	GOBP name	GOMF name	GOCC name	KEGG name	Significant (4H Treatment - 4H Control)	-LOG(p value)_(4H Treatment - 4H Control)	Difference (4H Treatment - 4H Control)	Significant (8H Treatment - 8H Control)	-LOG(p value)_(8H Treatment - 8H Control)	Difference (8H Treatment - 8H Control)	Significant (24H Treatment - 24H Control)	-LOG(p value)_(24H Treatment - 24H Control)	Difference (24H Treatment - 24H Control)
Q9ZAH5	alr1	Alanine racemase 1	0	0	0	0	0	0	0	0	0	0	0	0	6.60206	6.47422	6.64048	0	0	0
Q9RQQ0	icaR	Biofilm operon icaADBC HTH-type negative transcriptional regulator IcaR	7.68395	7.69984	7.89042	0	0	0	7.88986	7.90417	7.90417	7.02938	6.86153	7.02531	8.2878	8.42488	8.19033	6.84942	6.75051	6.89321	biological regulation;biosynthetic process;cellular biosynthetic process;cellular macromolecule biosynthetic process;cellular macromolecule metabolic process;cellular metabolic process;cellular nitrogen compound metabolic process;cellular process;macromolecule biosynthetic process;macromolecule metabolic process;metabolic process;nitrogen compound metabolic process;nucleic acid metabolic process;…	binding;DNA binding;nucleic acid binding			+	2.51313	-3.41475	+	4.12428	-3.08052	+	4.28598	-4.8831
Q9RFJ6	rot	HTH-type transcriptional regulator rot	8.68574	8.69373	8.71096	7.98722	8.35603	7.90848	8.77597	8.76042	8.76864	8.47129	8.51587	8.51322	8.78104	8.76268	8.90091	8.63448	8.56348	8.61066	biosynthetic process;cellular biosynthetic process;cellular macromolecule biosynthetic process;cellular macromolecule metabolic process;cellular metabolic process;cellular nitrogen compound metabolic process;cellular process;macromolecule biosynthetic process;macromolecule metabolic process;metabolic process;multi-organism process;nitrogen compound metabolic process;nucleic acid metabolic process…	binding;DNA binding;nucleic acid binding;nucleic acid binding transcription factor activity;sequence-specific DNA binding transcription factor activity	cell part;intracellular		+	1.9445	-2.03601	+	4.22663	-0.890999	+	1.93461	-0.70426
Q9KJN4	arlR	Response regulator ArlR	9.25285	9.36922	9.38917	9.26717	9.21484	9.34242	9.37658	9.35793	9.33041	9.27646	9.26717	9.29003	9.33244	9.38917	9.35411	9.0899	9.01703	9.03342	biological regulation;biosynthetic process;cellular biosynthetic process;cellular macromolecule biosynthetic process;cellular macromolecule metabolic process;cellular metabolic process;cellular nitrogen compound metabolic process;cellular process;cellular response to stimulus;macromolecule biosynthetic process;macromolecule metabolic process;metabolic process;multi-organism process;nitrogen compo…	binding;DNA binding;nucleic acid binding	cell part;cytoplasm;intracellular part					+	2.17176	-0.256074	+	3.45759	-1.03572
Q9KJN3	arlS	Signal transduction histidine-protein kinase ArlS	7.68305	7.66652	7.64542	7.53275	7.51851	7.80482	7.6902	7.59879	7.67943	7.49969	7.59218	7.58433	7.50515	7.49554	7.51983	7.46982	7.4133	7.52504
Q9F0R1	sarR	HTH-type transcriptional regulator SarR	0	0	0	0	0	0	0	0	5.98935	0	0	0	0	0	0	0	0	0
Q9EZ12	dapA	4-hydroxy-tetrahydrodipicolinate synthase	7.49136	7.43775	7.52244	7.24551	7.29667	7.25768	7.08991	7.14301	7.17026	7.233	7.26951	7.25527	6.78032	6.91593	6.87852	0	0	0	amine biosynthetic process;amine metabolic process;aspartate family amino acid biosynthetic process;aspartate family amino acid metabolic process;biosynthetic process;carboxylic acid biosynthetic process;carboxylic acid metabolic process;cellular amine metabolic process;cellular amino acid biosynthetic process;cellular amino acid metabolic process;cellular biosynthetic process;cellular ketone met…	carbon-oxygen lyase activity;catalytic activity;dihydrodipicolinate synthase activity;hydro-lyase activity;lyase activity	cell part;cytoplasm;intracellular part	Lysine biosynthesis	+	2.76126	-0.721634	+	1.9881	0.392652	+	2.75712	-3.13515
Q9EZ11	dapB	4-hydroxy-tetrahydrodipicolinate reductase	0	0	0	0	0	0	0	0	0	0	0	0	0	0	5.80072	0	0	0
Q9EYW6	sspC	Staphostatin B	8.28556	8.28103	8.36736	8.06446	8.14613	7.99739	8.17898	8.07918	8.17026	8.233	8.2833	8.2878	8.37475	8.41497	8.25768	8.06446	8.09342	8.04532	multi-organism process;pathogenesis	cysteine-type endopeptidase inhibitor activity;endopeptidase inhibitor activity;endopeptidase regulator activity;enzyme inhibitor activity;enzyme regulator activity;peptidase inhibitor activity;peptidase regulator activity	cell part;cytoplasm;intracellular part		+	2.03528	-0.803878	+	1.57923	0.415993	+	2.33476	-0.934788
Q93T05	mutL	DNA mismatch repair protein MutL	7.54283	7.54531	7.63347	7.50106	7.44091	7.34044	7.99607	8.10037	8.13988	7.83251	7.89265	7.70757	8.39967	8.33445	8.35025	8.45939	8.45939	8.46687	cellular macromolecule metabolic process;cellular metabolic process;cellular nitrogen compound metabolic process;cellular process;cellular response to stimulus;cellular response to stress;DNA metabolic process;DNA repair;macromolecule metabolic process;metabolic process;mismatch repair;nitrogen compound metabolic process;nucleic acid metabolic process;nucleobase-containing compound metabolic proc…	adenyl nucleotide binding;adenyl ribonucleotide binding;ATP binding;binding;DNA binding;double-stranded DNA binding;mismatched DNA binding;nucleic acid binding;nucleotide binding;purine nucleotide binding;purine ribonucleoside triphosphate binding;purine ribonucleotide binding;ribonucleotide binding;structure-specific DNA binding	cell part;intracellular part;macromolecular complex;mismatch repair complex;protein complex	Mismatch repair				+	1.74186	-0.889826	+	2.14738	0.333607
Q93Q23	mgt	Monofunctional glycosyltransferase	8.06819	8.04139	8.0086	8.06446	8.16732	8.05308	7.87332	7.80346	7.86629	7.54158	7.48287	7.52244	7.67669	7.73719	7.80209	7.24551	7.34635	7.26245	amine metabolic process;aminoglycan biosynthetic process;aminoglycan metabolic process;biological regulation;biosynthetic process;carbohydrate biosynthetic process;carbohydrate metabolic process;cell wall macromolecule biosynthetic process;cell wall macromolecule metabolic process;cell wall organization;cell wall organization or biogenesis;cellular biosynthetic process;cellular cell wall macromol…	catalytic activity;transferase activity;transferase activity, transferring glycosyl groups	cell part;integral to membrane;intrinsic to membrane;membrane;membrane part;plasma membrane	Peptidoglycan biosynthesis				+	3.52974	-1.10307	+	3.16411	-1.50778
Q7X2S2	arcC2	Carbamate kinase 2	8.19866	8.22789	8.21219	0	0	0	8.14613	8.1959	8.18184	0	0	0	8.50515	8.51188	8.58546	0	7.43775	0	amine metabolic process;arginine metabolic process;carbamoyl phosphate catabolic process;carbamoyl phosphate metabolic process;carboxylic acid metabolic process;catabolic process;cellular amine metabolic process;cellular amino acid metabolic process;cellular catabolic process;cellular ketone metabolic process;cellular metabolic process;cellular nitrogen compound catabolic process;cellular nitroge…	adenyl nucleotide binding;adenyl ribonucleotide binding;ATP binding;binding;carbamate kinase activity;catalytic activity;kinase activity;nucleotide binding;phosphotransferase activity, carboxyl group as acceptor;purine nucleotide binding;purine ribonucleoside triphosphate binding;purine ribonucleotide binding;ribonucleotide binding;transferase activity;transferase activity, transferring phosphoru…	cell part;cytoplasm;intracellular part	Arginine and proline metabolism;Nitrogen metabolism;Purine metabolism	+	5.64829	-5.54038	+	3.23787	-5.54317	+	1.92756	-6.10659
Q7BHL7	msrR	Regulatory protein MsrR	8.29226	8.66464	8.60638	8.91169	8.80821	8.58771	8.59106	8.69897	8.7767	8.54158	8.53403	8.56348	8.91751	8.89708	8.95473	8.48287	8.49136	8.41497	biological regulation;biosynthetic process;cellular biosynthetic process;cellular macromolecule biosynthetic process;cellular macromolecule metabolic process;cellular metabolic process;cellular nitrogen compound metabolic process;cellular process;macromolecule biosynthetic process;macromolecule metabolic process;metabolic process;nitrogen compound metabolic process;nucleic acid metabolic process;…		cell part;integral to membrane;intrinsic to membrane;membrane;membrane part;plasma membrane					+	1.22765	-0.473541	+	4.00667	-1.5282
Q59801	hysA	Hyaluronate lyase	6.76641	7.07918	6.92634	0	0	0	7.48144	7.38021	7.25768	0	0	0	7.82347	7.43136	7.49693	7.08279	0	0	carbohydrate metabolic process;metabolic process;primary metabolic process	binding;carbohydrate binding;carbon-oxygen lyase activity;carbon-oxygen lyase activity, acting on polysaccharides;catalytic activity;hyaluronate lyase activity;lyase activity	extracellular region					+	1.89835	-2.60368	+	1.61813	-2.8397
Q53727	pcrA	ATP-dependent DNA helicase PcrA	9.2014	9.08279	9.22531	9.01703	8.99476	9.10037	8.52763	8.55991	8.53782	8.87679	8.87332	8.9248	8.26482	8.35218	8.33041	8.4456	8.47567	8.51587	cellular macromolecule metabolic process;cellular metabolic process;cellular nitrogen compound metabolic process;cellular process;DNA conformation change;DNA duplex unwinding;DNA geometric change;DNA metabolic process;DNA unwinding involved in replication;macromolecule metabolic process;metabolic process;nitrogen compound metabolic process;nucleic acid metabolic process;nucleobase-containing comp…	adenyl nucleotide binding;adenyl ribonucleotide binding;ATP binding;ATPase activity;ATPase activity, coupled;ATP-dependent DNA helicase activity;ATP-dependent helicase activity;binding;catalytic activity;DNA binding;DNA helicase activity;DNA-dependent ATPase activity;helicase activity;hydrolase activity;hydrolase activity, acting on acid anhydrides;hydrolase activity, acting on acid anhydrides, i…	cell part;cytoplasm;intracellular part	Mismatch repair;Nucleotide excision repair				+	4.27755	1.16218	+	2.09879	0.542289
Q53726	pcrB	Heptaprenylglyceryl phosphate synthase	9.11727	9.18184	9.22011	8.06446	8.09342	7.96426	8.85248	8.89432	8.89154	7.98767	7.93601	7.9952	8.41664	8.49276	8.48287	8.25285	8.18469	8.22272	biosynthetic process;cellular biosynthetic process;cellular lipid metabolic process;cellular metabolic process;cellular process;glycerolipid biosynthetic process;glycerolipid metabolic process;glycerophospholipid biosynthetic process;glycerophospholipid metabolic process;lipid biosynthetic process;lipid metabolic process;metabolic process;organophosphate metabolic process;phospholipid biosyntheti…	binding;catalytic activity;cation binding;ion binding;magnesium ion binding;metal ion binding;polyprenyltransferase activity;prenyltransferase activity;transferase activity;transferase activity, transferring alkyl or aryl (other than methyl) groups			+	4.67144	-3.76162	+	5.60722	-3.01128	+	2.85225	-0.810565
Q53705	lytS	Sensor histidine kinase/phosphatase LytS	9.48572	9.35603	9.34242	9.5092	9.54777	9.64836	9.2878	9.31387	9.33846	9.17609	9.31806	9.30103	9.36173	9.26717	9.23805	9.54283	9.43297	9.50379	cell wall organization;cell wall organization or biogenesis;cellular component organization or biogenesis	adenyl nucleotide binding;adenyl ribonucleotide binding;ATP binding;binding;catalytic activity;kinase activity;molecular transducer activity;nucleotide binding;phosphotransferase activity, alcohol group as acceptor;phosphotransferase activity, nitrogenous group as acceptor;protein histidine kinase activity;protein kinase activity;purine nucleotide binding;purine ribonucleoside triphosphate bindin…	cell part;integral to membrane;intrinsic to membrane;membrane;membrane part;plasma membrane	Two-component system	+	1.31849	0.577092				+	1.84405	0.678382
Q2G2Y4	SAOUHSC_01918	Excalibur domain-containing protein	9.14613	8.993	9	7.69285	7.77085	8.24055	8.71933	8.80277	8.71767	8.06819	8.16732	8.15229	8.51188	8.51851	8.60746	8.28556	8.3032	8.30535					+	2.52054	-3.80347	+	3.91553	-2.05072	+	2.85416	-0.823559
Q2G2Y0	ssl7	Staphylococcal superantigen-like 7	7.92169	7.82347	7.82347	7.97727	7.93651	7.6637	7.79865	7.83948	7.85854	7.92942	7.97635	7.98318	7.68574	7.77012	7.77232	7.81157	7.89209	7.89927	multi-organism process;pathogenesis		extracellular region					+	2.23	0.434373	+	1.44968	0.41498
Q2G2X9	SAOUHSC_00393	Uncharacterized protein	9.3075	9.3483	9.42488	9.62428	9.6946	9.44091	8.99432	8.99476	9.06819	9.0569	9.09691	9.06819	8.82478	8.8848	8.9425	9.01284	9.04922	9.01703	multi-organism process;pathogenesis		extracellular region		+	1.27795	0.751988				+	1.78053	0.472834
Q2G2X8	SAOUHSC_00394	Uncharacterized protein	7.55991	7.76268	7.64836	7.97909	7.88252	7.82672	7.78533	7.85914	7.95472	7.7574	7.75128	7.67117	8.0086	8.11727	7.98408	7.7839	7.76938	7.73078	multi-organism process;pathogenesis		extracellular region		+	1.50193	0.794378	+	1.1663	-0.464345	+	2.4818	-0.914511
Q2G2X7	ssl10	Staphylococcal superantigen-like 10	0	0	0	0	0	0	0	0	0	0	0	0	0	0	5.59879	0	0	0
Q2G2X6	SAOUHSC_00646	Penicillin-binding protein 4, putative	0	0	0	0	0	0	0	0	0	0	0	0	0	6.45788	6.55509	0	0	0
Q2G2X5	SAOUHSC_00642	Transport permease protein	8.4624	8.39445	8.40654	8.11059	8.26007	8.27875	8.41664	8.38561	8.3784	8.35984	8.40993	8.4183	8.45788	8.54283	8.43933	8.2878	8.2833	8.25768	establishment of localization;transport		cell part;integral to membrane;intrinsic to membrane;membrane;membrane part;plasma membrane	ABC transporters	+	1.63476	-0.67986				+	2.44635	-0.676853
Q2G2X4	tarB	Teichoic acid glycerol-phosphate primase	0	0	0	0	0	0	0	0	0	0	0	0	0	0	0	9.03342	9.07918	8.94792
Q2G2X2	tarD	Glycerol-3-phosphate cytidylyltransferase	0	0	0	0	0	0	0	0	0	0	0	0	0	0	0	0	6.38021	0
Q2G2X1	SAOUHSC_00454	DNA polymerase III subunit delta	0	0	0	0	0	0	0	0	0	0	0	0	0	0	0	8.47422	8.25768	8.1271
Q2G2W9	SAOUHSC_00455	PSP1 C-terminal domain-containing protein	8.94792	8.92117	8.87737	8.91855	8.89873	8.94448	8.96942	8.96	8.9196	8.93802	8.96988	8.97635	8.80277	8.74115	8.75205	8.84198	8.84073	8.87157											+	1.79443	0.286037
Q2G2W8	SAOUHSC_00456	Uncharacterized protein	10.2455	10.2227	10.233	10.356	10.3324	10.29	9.88252	9.91328	9.91487	9.73878	9.79309	9.7364	9.63144	9.5966	9.62221	9.43136	9.31806	9.40654	biosynthetic process;cellular biosynthetic process;cellular macromolecule biosynthetic process;cellular macromolecule metabolic process;cellular metabolic process;cellular nitrogen compound metabolic process;cellular process;DNA metabolic process;DNA replication;macromolecule biosynthetic process;macromolecule metabolic process;metabolic process;nitrogen compound metabolic process;nucleic acid me…				+	1.97578	0.307027	+	2.64145	-0.489889	+	2.52445	-0.768792
Q2G2W6	SAOUHSC_02626	Uncharacterized protein	8.71265	8.56229	8.68931	8.52375	8.66464	8.63347	8.66932	8.68124	8.61805	8.68753	8.7356	8.62839	8.47712	8.50106	8.52375	8.69984	8.63548	8.70672											+	2.61804	0.598071
Q2G2W5	SAOUHSC_02630	Biotin_lipoyl_2 domain-containing protein	8.10037	8.03743	8.01703	8.46982	8.4014	8.35793	8.32015	8.28103	8.29885	8.6637	8.69548	8.60097	8.17319	8.04139	8.13354	8.57519	8.57634	8.58092					+	3.01957	1.18961	+	3.52807	1.17388	+	3.53108	1.53289
Q2G2W4	SAOUHSC_02631	HTH tetR-type domain-containing protein	8.3032	8.33041	8.28103	8.44091	8.45484	8.38917	8.13672	8.17026	8.37658	8.11727	8.14613	8.19033	8.43616	8.52114	8.39093	8.43457	8.38382	8.43297	biological regulation;biosynthetic process;cellular biosynthetic process;cellular macromolecule biosynthetic process;cellular macromolecule metabolic process;cellular metabolic process;cellular nitrogen compound metabolic process;cellular process;macromolecule biosynthetic process;macromolecule metabolic process;metabolic process;nitrogen compound metabolic process;nucleic acid metabolic process;…	binding;DNA binding;nucleic acid binding			+	2.13344	0.410011
Q2G2W3	SAOUHSC_02627	Abhydrolase_3 domain-containing protein	7.26951	0	7.1038	0	0	0	7.15534	7.10721	7.02938	7.12205	0	7.07555	7.0086	7.0569	7.08991	7.13988	6.99826	7.10037
Q2G2W2	SAOUHSC_02628	Uncharacterized protein	9.17898	9.06819	9.0607	8.14922	8.0086	7.87622	9.18184	9.07918	9.13672	7.78675	7.79518	7.81558	8.92221	8.92891	8.95713	7.98453	7.98767	7.92324					+	3.62187	-3.62514	+	5.76252	-4.42949	+	5.68489	-3.22538
Q2G2W1	SAOUHSC_02629	Drug resistance transporter, EmrB/QacA subfamily, putative	0	6.97543	6.81358	0	0	0	6.76938	6.81224	6.81823	6.82672	6.85248	6.80618	6.8202	6.86332	6.84942	6.62531	0	0	cellular process;establishment of localization;transmembrane transport;transport		cell part;integral to membrane;intrinsic to membrane;membrane;membrane part;plasma membrane								+	1.33455	-1.88228
Q2G2V9	SAOUHSC_02006	Uncharacterized protein	8.09342	8.03743	7.90255	7.89542	7.94399	8.17609	8.17898	8.08279	8.2014	7.96614	8.08636	8.04922	8.14301	8.04922	8.17319	7.95231	7.98046	7.98091											+	1.75986	-0.500217
Q2G2V2	menC	o-succinylbenzoate synthase	7.65896	7.65992	7.24304	7.47276	7.45484	7.68753	7.47712	7.41497	7.60853	7.49831	7.55388	7.59439	7.53782	7.58771	7.4183	7.61805	7.74663	7.76042	biosynthetic process;cellular biosynthetic process;cellular ketone metabolic process;cellular metabolic process;cellular process;coenzyme biosynthetic process;coenzyme metabolic process;cofactor biosynthetic process;cofactor metabolic process;fat-soluble vitamin biosynthetic process;fat-soluble vitamin metabolic process;menaquinone biosynthetic process;menaquinone metabolic process;metabolic proc…	binding;carbon-oxygen lyase activity;catalytic activity;cation binding;hydro-lyase activity;ion binding;lyase activity;magnesium ion binding;metal ion binding		Ubiquinone and other terpenoid-quinone biosynthesis							+	1.33902	0.64365
Q2G2U9	sarA	Transcriptional regulator SarA	0	0	0	0	0	0	6.15063	0	0	0	0	0	0	0	0	0	0	0
Q2G2U6	walR	Transcriptional regulatory protein WalR	0	0	7.29144	0	0	0	0	7.44091	7.38739	7.32408	0	0	7.30103	7.35025	7.58771	7.28556	0	0
Q2G2U5	SAOUHSC_00024	Lactamase_B domain-containing protein	7.30535	7.37475	7.31597	7.32838	7.19312	0	7.31597	7.32015	7.31806	7.3032	7.19033	7.28103	6.81624	6.83569	6.9058	7.19312	6.89873	6.95904
Q2G2U4	walK	Sensor protein kinase WalK	8.44405	8.50106	8.44091	8.03743	8.06446	7.5966	8.16137	8.14922	8.11727	7.94448	7.94841	8.09691	8.11394	8.23045	8.13354	8.0569	8.01703	8.03743		adenyl nucleotide binding;adenyl ribonucleotide binding;ATP binding;binding;catalytic activity;kinase activity;molecular transducer activity;nucleotide binding;phosphotransferase activity, alcohol group as acceptor;phosphotransferase activity, nitrogenous group as acceptor;protein histidine kinase activity;protein kinase activity;purine nucleotide binding;purine ribonucleoside triphosphate bindin…	cell part;integral to membrane;intrinsic to membrane;membrane;membrane part;plasma membrane	Two-component system	+	1.67314	-1.86862	+	1.31834	-0.48506	+	1.49583	-0.405903
Q2G2U3	SAOUHSC_00022	YycH domain-containing protein	6.93601	6.97081	6.935	0	0	6.94458	6.91169	6.93802	6.87737	6.91803	6.96802	6.94939	6.90687	7	6.90037	6.75051	6.84011	6.8537											+	1.24443	-0.401873
Q2G2U1	saeS	Histidine protein kinase SaeS	0	0	0	0	0	0	0	0	5.34402	0	0	0	0	0	0	0	0	0
Q2G2U0	SAOUHSC_00710	N-acetylglucosamine-6-phosphate deacetylase	6.7007	0	6.71433	0	0	0	6.73239	6.75435	0	0	0	6.74586	6.77743	6.7767	6.79029	0	0	0	alcohol metabolic process;amino sugar metabolic process;carbohydrate metabolic process;cellular carbohydrate metabolic process;cellular metabolic process;cellular process;glucosamine metabolic process;metabolic process;monosaccharide metabolic process;N-acetylglucosamine metabolic process;primary metabolic process;small molecule metabolic process	catalytic activity;deacetylase activity;hydrolase activity;hydrolase activity, acting on carbon-nitrogen (but not peptide) bonds;hydrolase activity, acting on carbon-nitrogen (but not peptide) bonds, in linear amides;N-acetylglucosamine-6-phosphate deacetylase activity		Amino sugar and nucleotide sugar metabolism							+	1.17497	-0.957573
Q2G2T9	SAOUHSC_00711	Uncharacterized protein	7.49693	7.44871	7.32634	0	0	0	6.68574	0	6.63548	7.11394	7.11394	7.07188	0	0	0	6.52634	0	6.95328		binding;catalytic activity;coenzyme binding;cofactor binding;flavin adenine dinucleotide binding;oxidoreductase activity;oxidoreductase activity, acting on CH-OH group of donors			+	2.03697	-2.61056	+	2.5229	1.71775
Q2G2T8	SAOUHSC_00712	Aldo_ket_red domain-containing protein	0	0	6.39601	0	0	0	6.45788	6.36361	0	6.42975	6.53275	6.34242	0	6.31387	0	6.42325	0	0
Q2G2T6	SAOUHSC_00015	Cyclic-di-AMP phosphodiesterase	7.08636	6.87099	6.98408	6.97818	6.90255	0	7	7.07555	7.06819	6.993	7.04532	7.1038	6.93902	7.00432	7.11727	6.90848	7.00432	0
Q2G2T3	rplI	50S ribosomal protein L9	8.18752	8.19866	8.01703	8.29447	8.29667	8.60314	7.91062	7.86392	7.60314	7.8451	7.84634	8.03342	7.35025	0	0	0	0	0
Q2G2T1	SAOUHSC_01973	HD domain-containing protein	7.0086	7.1038	6.89542	0	0	0	0	0	0	0	0	0	7.15836	7.24551	7.08991	0	0	0		binding;nucleic acid binding			+	2.33328	-1.17547				+	1.56631	-2.92834
Q2G2T0	SAOUHSC_01969	Uncharacterized protein	6.39445	0	6.61066	6.48144	6.55267	0	6.86806	6.73239	6.88081	6.62118	6.64345	6.70329	6.73799	6.67578	6.66464	6.49969	6.66087	6.66087								+	1.48348	-0.56843
Q2G2S8	SAOUHSC_01974	AAA_27 domain-containing protein	0	0	0	0	0	0	0	0	0	0	0	0	0	6.41996	0	0	0	0
Q2G2S7	SAOUHSC_01975	Metallophos domain-containing protein	7.36922	7.3927	7.40483	0	7.24304	7.66652	7.19033	7.20412	7.24551	0	0	0	7.48996	7.55871	7.44091	6.8488	6.91803	6.89708		catalytic activity;hydrolase activity						+	2.02567	-2.94812	+	3.97006	-2.02157
Q2G2S6	prsA	Foldase protein PrsA	0	0	0	0	0	0	7.38561	7.29003	7.16732	7.49415	7.81491	7.38917	8.44405	8.4843	8.62325	9.88366	9.85309	9.76118	cellular macromolecule metabolic process;cellular metabolic process;cellular process;cellular protein metabolic process;macromolecule metabolic process;metabolic process;primary metabolic process;protein folding;protein metabolic process	catalytic activity;cis-trans isomerase activity;isomerase activity;peptidyl-prolyl cis-trans isomerase activity	cell part;membrane;plasma membrane								+	4.43806	4.36981
Q2G2S0	purB	Adenylosuccinate lyase	0	0	0	0	0	0	0	0	0	0	0	6.03342	0	0	0	0	0	0
Q2G2R9	SAOUHSC_02131	UPF0316 protein SAOUHSC_02131	0	0	0	0	0	0	0	0	0	0	0	0	0	0	5.93247	0	0	0
Q2G2R8	sspP	Staphopain A	0	0	0	0	0	0	0	0	6.93207	0	0	0	0	0	0	0	0	0
Q2G2R7	SAOUHSC_02129	Staphostatin_A domain-containing protein	8.16137	8.15229	8.02119	8.44091	8.44871	8.34439	8.50106	8.54407	8.53275	8.94101	8.993	8.93752	8.55751	8.48714	8.51587	9.22789	9.2014	9.23045		cysteine-type endopeptidase inhibitor activity;endopeptidase inhibitor activity;endopeptidase regulator activity;enzyme inhibitor activity;enzyme regulator activity;peptidase inhibitor activity;peptidase regulator activity	cell part;cytoplasm;intracellular part		+	2.22084	0.99565	+	4.39231	1.43247	+	5.20055	2.32448
Q2G2R6	SAOUHSC_02130	Uncharacterized protein	0	0	0	0	0	0	7.38021	7.26717	7.49969	0	0	0	7.42975	7.40312	7.58206	0	0	0								+	1.94158	-3.25537	+	3.1594	-3.58788
Q2G2Q7	SAOUHSC_00276	Uncharacterized protein	7.91855	8.02119	7.96567	0	7.62634	7.43775	9.07918	9.06446	9.11394	8.50651	8.62221	8.45025	9.79865	9.67117	9.5682	9.65801	9.63548	9.66932								+	3.35104	-1.85874
Q2G2Q6	SAOUHSC_00277	Uncharacterized protein	0	6.97727	7.26245	8.4609	8.53275	8.57054	7.4216	7.14922	7.36922	8.56937	8.83059	8.91009	0	0	7.33244	8.36549	8.34242	8.50786					+	2.15207	5.74664	+	3.41011	4.83896	+	2.00494	6.23068
Q2G2Q4	rbfA	Ribosome-binding factor A	7.76864	7.75205	7.67669	7.38382	7.35984	7.07918	8.18469	8.31806	8.13033	7.94743	7.67669	7.79309	8.64048	8.87506	8.54407	8.25285	8.04532	8.13988	cellular macromolecule metabolic process;cellular metabolic process;cellular nitrogen compound metabolic process;cellular process;macromolecule metabolic process;metabolic process;ncRNA metabolic process;ncRNA processing;nitrogen compound metabolic process;nucleic acid metabolic process;nucleobase-containing compound metabolic process;primary metabolic process;RNA metabolic process;RNA processing…		cell part;cytoplasm;intracellular part		+	1.96589	-1.52205	+	1.86762	-1.34634	+	2.02927	-1.79556
Q2G2Q3	truB	tRNA pseudouridine synthase B	7.83632	7.91855	7.85309	7.83187	7.70672	7.67852	8.03342	8.34439	8.14301	7.99432	7.70586	7.94694	8.38561	8.80754	8.33445	7.88874	7.71433	7.84198	cellular macromolecule metabolic process;cellular metabolic process;cellular nitrogen compound metabolic process;cellular process;macromolecule metabolic process;macromolecule modification;metabolic process;ncRNA metabolic process;ncRNA processing;nitrogen compound metabolic process;nucleic acid metabolic process;nucleobase-containing compound metabolic process;primary metabolic process;pseudouri…	binding;catalytic activity;intramolecular transferase activity;isomerase activity;nucleic acid binding;pseudouridine synthase activity;RNA binding									+	1.92338	-2.30602
Q2G2Q2	SAOUHSC_01249	Riboflavin biosynthesis protein	0	0	0	0	0	0	0	0	5.85251	0	0	0	0	0	0	0	0	0
Q2G2Q1	rpsO	30S ribosomal protein S15	0	7.0086	6.93349	0	0	0	6.97035	6.98811	6.98588	0	0	6.76864	6.89818	6.94939	6.9196	6.78247	0	0	biosynthetic process;cellular biosynthetic process;cellular macromolecule biosynthetic process;cellular macromolecule metabolic process;cellular metabolic process;cellular process;cellular protein metabolic process;macromolecule biosynthetic process;macromolecule metabolic process;metabolic process;primary metabolic process;protein metabolic process;translation	binding;nucleic acid binding;RNA binding;rRNA binding;structural constituent of ribosome;structural molecule activity	cell part;cytoplasmic part;intracellular non-membrane-bounded organelle;intracellular organelle;intracellular part;macromolecular complex;non-membrane-bounded organelle;organelle;ribonucleoprotein complex;ribosome	Ribosome				+	1.71552	-1.3632	+	1.2936	-1.44286
Q2G2Q0	gyrA	DNA gyrase subunit A	0	0	6.64787	6.73843	0	0	6.6587	0	0	6.65706	6.69373	6.5966	0	0	0	6.76042	6.78032	6.61909
Q2G2P8	nnrD	ADP-dependent (S)-NAD(P)H-hydrate dehydratase	6.78032	0	6.89321	0	0	0	7.02531	7.06446	7.02119	0	0	0	7.10037	7.08636	7.14922	6.943	0	0	cellular metabolic process;cellular nitrogen compound metabolic process;cellular process;coenzyme metabolic process;cofactor metabolic process;heterocycle metabolic process;metabolic process;nicotinamide nucleotide metabolic process;nitrogen compound metabolic process;nucleobase-containing compound metabolic process;nucleobase-containing small molecule metabolic process;nucleoside phosphate metab…	adenyl nucleotide binding;adenyl ribonucleotide binding;ATP binding;binding;nucleotide binding;purine nucleotide binding;purine ribonucleoside triphosphate binding;purine ribonucleotide binding;ribonucleotide binding									+	1.16073	-1.49086
Q2G2P5	nikA	Nickel-binding protein NikA	6.93399	7.29667	7.14922	0	0	0	7.65801	7.67943	7.72591	0	0	0	6.92634	6.90741	7.23045	0	0	0	cellular process;establishment of localization;transmembrane transport;transport		ATP-binding cassette (ABC) transporter complex;cell part;macromolecular complex;membrane part;protein complex	ABC transporters				+	4.48532	-3.9779	+	1.34922	-2.65056
Q2G2P2	SAOUHSC_00204	Nitric oxide dioxygenase	0	0	0	0	0	0	0	0	6.54701	0	0	0	0	0	0	0	0	0
Q2G2N7	SAOUHSC_02250	Phage terminase, small subunit, putative	0	0	0	0	0	0	0	0	0	0	0	5.90417	0	0	0	0	0	0
Q2G2N5	SAOUHSC_01354	Sodium:alanine symporter family protein, putative	6.75967	6.74819	6.83187	7.01703	6.77379	6.8739	6.617	6.54777	6.64933	6.71349	6.68305	6.63548	0	6.72673	0	6.66745	0	0
Q2G2N4	glcT	Protein GlcT	0	0	0	0	0	0	0	0	0	0	0	0	0	5.86747	0	0	0	0
Q2G2N2	SAOUHSC_01358	Uncharacterized protein	0	0	5.90103	0	0	0	0	0	0	0	0	0	0	0	0	0	0	0
Q2G2N1	SAOUHSC_02001	Uncharacterized protein	0	0	0	7.03342	7.01703	7.10721	6.79099	6.91328	7.03342	6.99078	7.0569	6.989	6.72346	0	0	0	0	0					+	3.10164	1.52326
Q2G2M8	SAOUHSC_02004	UPF0374 protein SAOUHSC_02004	8.03342	7.98363	8.01703	7.25768	7.58771	7.70415	8.0086	8.10037	8.04532	7.79796	7.83822	7.89376	8.14613	8.15229	8.22272	7.98543	7.93095	7.92065					+	1.67314	-1.64385	+	2.24624	-0.691352	+	2.70152	-0.757524
Q2G2M7	SAOUHSC_00510	Serine acetyltransferase	9.08279	9.03342	9.01703	9.06446	9.09691	8.96	9.11394	9.13988	9.13988	9.06819	9.06819	9.07918	9.25042	9.27416	9.29003	9.01284	8.99255	9	amine biosynthetic process;amine metabolic process;biosynthetic process;carboxylic acid biosynthetic process;carboxylic acid metabolic process;cellular amine metabolic process;cellular amino acid biosynthetic process;cellular amino acid metabolic process;cellular biosynthetic process;cellular ketone metabolic process;cellular metabolic process;cellular nitrogen compound biosynthetic process;cellu…	acetyltransferase activity;catalytic activity;O-acetyltransferase activity;O-acyltransferase activity;serine O-acetyltransferase activity;serine O-acyltransferase activity;transferase activity;transferase activity, transferring acyl groups;transferase activity, transferring acyl groups other than amino-acyl groups	cell part;cytoplasm;intracellular part	Cysteine and methionine metabolism;Sulfur metabolism				+	2.49495	-0.197265	+	4.50381	-0.89606
Q2G2M6	cysS	Cysteine--tRNA ligase	9.6149	9.55871	9.6053	9.76193	9.77597	9.84819	9.57054	9.61909	9.67761	9.5611	9.52763	9.58659	9.40483	9.51455	9.52634	9.0899	9.07188	9.12385	amine metabolic process;amino acid activation;carboxylic acid metabolic process;cellular amine metabolic process;cellular amino acid metabolic process;cellular ketone metabolic process;cellular macromolecule metabolic process;cellular metabolic process;cellular nitrogen compound metabolic process;cellular process;cysteinyl-tRNA aminoacylation;macromolecule metabolic process;metabolic process;ncRN…	adenyl nucleotide binding;adenyl ribonucleotide binding;aminoacyl-tRNA ligase activity;ATP binding;binding;catalytic activity;cation binding;cysteine-tRNA ligase activity;ion binding;ligase activity;ligase activity, forming aminoacyl-tRNA and related compounds;ligase activity, forming carbon-oxygen bonds;metal ion binding;nucleotide binding;purine nucleotide binding;purine ribonucleoside triphosp…	cell part;cytoplasm;intracellular part	Aminoacyl-tRNA biosynthesis	+	2.50207	0.672337				+	3.1286	-1.28457
Q2G2M5	SAOUHSC_00514	Uncharacterized protein	7.01703	7.0607	7.03342	0	0	0	6.71265	6.68664	6.76492	0	0	0	0	0	6.6637	0	0	0											+	1.31546	-0.939228
Q2G2M3	SAOUHSC_00513	Putative TrmH family tRNA/rRNA methyltransferase	0	0	0	0	0	0	0	0	0	0	0	0	0	0	0	6.51851	6.89154	0
Q2G2M2	mprF	Phosphatidylglycerol lysyltransferase	7.65992	7.68842	7.62325	7.57054	7.56937	7.4843	7.31597	7.38382	7.47567	7.54654	7.47712	7.48996	7.31175	7.47567	7.35984	6.85974	6.95231	6.98227	lipid metabolic process;metabolic process;multi-organism process;pathogenesis;primary metabolic process;response to antibiotic;response to chemical stimulus;response to stimulus	catalytic activity;lysyltransferase activity;transferase activity;transferase activity, transferring acyl groups;transferase activity, transferring amino-acyl groups	cell part;integral to membrane;intrinsic to membrane;membrane;membrane part;plasma membrane	Staphylococcus aureus infection	+	1.55757	-0.384644				+	2.74711	-1.49813
Q2G2M0	SAOUHSC_01362	Tautomerase	7.21219	7.23805	7.18752	7.08991	7.18469	0	7.32015	7.25285	7.24304	7.16137	7.17026	7.22531	7.2014	7.24797	7.22789	7.17609	7.21748	7.20683	cellular aromatic compound metabolic process;cellular metabolic process;cellular process;metabolic process	catalytic activity;isomerase activity		Benzoate degradation;Dioxin degradation				+	1.28876	-0.286902
Q2G2L8	SAOUHSC_02810	HTH merR-type domain-containing protein	7.84261	7.85431	7.81889	8.0569	8.10037	8.04139	0	0	7.31275	0	0	0	0	0	0	0	0	0	biological regulation;regulation of biological process;regulation of biosynthetic process;regulation of cellular biosynthetic process;regulation of cellular macromolecule biosynthetic process;regulation of cellular metabolic process;regulation of cellular process;regulation of gene expression;regulation of macromolecule biosynthetic process;regulation of macromolecule metabolic process;regulation…	binding;DNA binding;nucleic acid binding			+	3.42705	0.756145
Q2G2L7	SAOUHSC_02811	RelA_SpoT domain-containing protein	7.6149	7.87506	7.78176	8.2014	8.08279	8.08279	7.44091	7.48572	7.5302	7.38917	7.07918	7.16435	7.22272	7.24551	7.34439	0	0	0	cellular metabolic process;cellular nitrogen compound metabolic process;cellular process;guanosine tetraphosphate metabolic process;heterocycle metabolic process;metabolic process;nitrogen compound metabolic process;nucleobase-containing compound metabolic process;nucleobase-containing small molecule metabolic process;nucleoside bisphosphate metabolic process;nucleoside phosphate metabolic proces…				+	1.88334	1.21279	+	1.33876	-0.912567	+	1.83605	-3.32971
Q2G2L6	SAOUHSC_02812	Uncharacterized protein	7.10721	0	7.09342	0	0	0	0	0	0	0	0	0	0	0	0	0	0	0
Q2G2L3	tarA	N-acetylglucosaminyldiphosphoundecaprenol N-acetyl-beta-D-mannosaminyltransferase	0	0	0	0	0	0	0	0	0	0	0	0	0	0	0	0	6.21219	0
Q2G2L2	SAOUHSC_00637	ABC transporter domain-containing protein	7.72591	7.65514	7.62839	7.5563	7.6561	7.75967	7.64444	7.60531	7.52634	7.70672	7.74115	7.80754	7.52634	7.49969	7.48855	7.8055	7.74586	7.74586		adenyl nucleotide binding;adenyl ribonucleotide binding;ATP binding;ATPase activity;binding;catalytic activity;hydrolase activity;hydrolase activity, acting on acid anhydrides;hydrolase activity, acting on acid anhydrides, in phosphorus-containing anhydrides;nucleoside-triphosphatase activity;nucleotide binding;purine nucleotide binding;purine ribonucleoside triphosphate binding;purine ribonucleo…						+	1.60458	0.530757	+	3.47581	0.866618
Q2G2L1	tagH	Teichoic acids export ATP-binding protein TagH	0	0	0	0	0	0	6.50106	6.66652	6.66745	6.66061	0	6.62428	6.68305	6.7796	6.89321	0	0	0	carbohydrate transport;establishment of localization;organic substance transport;polysaccharide transport;teichoic acid transport;transport	active transmembrane transporter activity;adenyl nucleotide binding;adenyl ribonucleotide binding;ATP binding;ATPase activity;ATPase activity, coupled;ATPase activity, coupled to movement of substances;ATPase activity, coupled to transmembrane movement of substances;binding;carbohydrate transmembrane transporter activity;catalytic activity;hydrolase activity;hydrolase activity, acting on acid anh…	ATP-binding cassette (ABC) transporter complex;cell part;macromolecular complex;membrane part;protein complex	ABC transporters	+	1.44167	1.68912				+	2.13011	-1.1028
Q2G2L0	SAOUHSC_00638	HTH dtxR-type domain-containing protein	0	0	0	0	0	0	6.3557	0	0	0	0	0	0	0	0	0	0	0
Q2G2K8	ureE	Urease accessory protein UreE	6.91698	6.86332	6.95231	7.45179	7.38021	7.26951	6.82217	6.86806	7.06819	0	6.88652	0	7.29667	7.1038	7.06446	7.2014	7.27416	7.26007	cellular amide metabolic process;cellular component assembly;cellular component organization;cellular component organization or biogenesis;cellular macromolecule metabolic process;cellular metabolic process;cellular nitrogen compound metabolic process;cellular process;cellular protein metabolic process;enzyme active site formation;macromolecular complex assembly;macromolecular complex subunit org…	binding;cation binding;ion binding;metal ion binding;nickel ion binding;transition metal ion binding	cell part;cytoplasm;intracellular part		+	2.82252	1.5158
Q2G2J8	SAOUHSC_01413	Uncharacterized protein SAOUHSC_01413	7.78032	7.83442	7.82151	8.07188	7.87795	7.7767	7.734	7.87622	7.89873	7.92737	7.90363	7.95856	8.09691	8.23045	8.06446	7.8537	7.83948	7.72428		adenyl nucleotide binding;adenyl ribonucleotide binding;ATP binding;ATPase activity;binding;catalytic activity;hydrolase activity;hydrolase activity, acting on acid anhydrides;hydrolase activity, acting on acid anhydrides, in phosphorus-containing anhydrides;nucleoside-triphosphatase activity;nucleotide binding;purine nucleotide binding;purine ribonucleoside triphosphate binding;purine ribonucleo…									+	2.11833	-1.07892
Q2G2J7	SAOUHSC_01414	Uncharacterized protein	7.30103	7.33846	7.34242	7.46538	7.32838	7.08279	6.96661	7.04139	7.02531	0	0	0	7.02938	7.24551	7.10721	6.75051	0	6.85491								+	4.05647	-2.12539	+	1.29529	-1.61434
Q2G2J2	ssaA2	Staphylococcal secretory antigen ssaA2	0	0	0	0	0	0	0	0	5.63146	0	0	0	0	0	0	0	0	0
Q2G2I1	tcaA	Membrane-associated protein TcaA	0	0	0	0	0	0	0	0	0	0	0	0	0	5.89763	0	0	0	0
Q2G2H8	mnhE1	Na(+)/H(+) antiporter subunit E1	0	0	6.08196	0	0	0	0	0	0	0	0	0	0	0	0	0	0	0
Q2G2H7	mnhD1	Na(+)/H(+) antiporter subunit D1	9.22789	9.27184	9.21748	10.1139	10.0828	10.2122	9.13354	9.25527	9.08636	9.92169	9.89982	9.75664	9.49136	9.35218	9.60206	9.92737	9.85914	9.94939	ATP synthesis coupled electron transport;cation transport;cellular metabolic process;cellular process;electron transport chain;establishment of localization;generation of precursor metabolites and energy;ion transport;metabolic process;metal ion transport;monovalent inorganic cation transport;oxidation-reduction process;respiratory electron transport chain;sodium ion transport;transport	active transmembrane transporter activity;antiporter activity;catalytic activity;cation transmembrane transporter activity;cation:cation antiporter activity;hydrogen ion transmembrane transporter activity;inorganic cation transmembrane transporter activity;ion transmembrane transporter activity;metal ion transmembrane transporter activity;monovalent cation:hydrogen antiporter activity;monovalent …	cell part;integral to membrane;intrinsic to membrane;membrane;membrane part;plasma membrane		+	4.53038	2.98055	+	3.20095	2.32864	+	2.29309	1.42876
Q2G2H5	dnaA	Chromosomal replication initiator protein DnaA	7.02531	7.04922	7.02531	0	0	0	7.04922	6.99123	6.88366	6.99123	7.01284	7.09342	0	6.78888	0	0	6.85794	6.95134
Q2G2H4	SAOUHSC_00002	Beta sliding clamp	6.75128	6.84386	6.80209	0	0	0	6.77452	6.78817	6.92942	0	0	0	6.75511	0	6.63849	7.06819	7.17609	7.03342	biosynthetic process;cellular biosynthetic process;cellular macromolecule biosynthetic process;cellular macromolecule metabolic process;cellular metabolic process;cellular nitrogen compound metabolic process;cellular process;DNA metabolic process;DNA replication;macromolecule biosynthetic process;macromolecule metabolic process;metabolic process;nitrogen compound metabolic process;nucleic acid me…	3'-5' exonuclease activity;binding;catalytic activity;DNA binding;DNA polymerase activity;DNA-directed DNA polymerase activity;exonuclease activity;hydrolase activity;hydrolase activity, acting on ester bonds;nuclease activity;nucleic acid binding;nucleotidyltransferase activity;transferase activity;transferase activity, transferring phosphorus-containing groups	cell part;cytoplasm;DNA polymerase complex;DNA polymerase III complex;intracellular part;macromolecular complex;protein complex	DNA replication;Homologous recombination;Mismatch repair;Purine metabolism;Pyrimidine metabolism				+	1.4395	-1.21385	+	1.43627	1.90383
Q2G2H3	SAOUHSC_02009	ABC transporter domain-containing protein	0	0	0	0	0	0	7.02119	6.96614	7.02531	0	0	0	7.08991	6.85003	6.99739	0	0	0		adenyl nucleotide binding;adenyl ribonucleotide binding;ATP binding;ATPase activity;binding;catalytic activity;hydrolase activity;hydrolase activity, acting on acid anhydrides;hydrolase activity, acting on acid anhydrides, in phosphorus-containing anhydrides;nucleoside-triphosphatase activity;nucleotide binding;purine nucleotide binding;purine ribonucleoside triphosphate binding;purine ribonucleo…		ABC transporters				+	2.77836	-1.68788	+	2.59328	-2.62861
Q2G2H1	SAOUHSC_02014	Uncharacterized protein	0	0	0	0	0	0	0	0	0	0	0	0	6.78176	6.82347	6.88423	0	0	0
Q2G2H0	SAOUHSC_02010	Uncharacterized protein	0	0	0	0	0	0	0	0	0	0	0	0	6.66181	6.78247	6.51188	6.3962	0	6.39445
Q2G2G9	recX	Regulatory protein RecX	0	0	0	0	0	0	6.61595	6.43136	6.59439	0	0	6.44871	6.86923	6.90417	6.92891	0	0	0	biological regulation;regulation of biological process;regulation of cellular metabolic process;regulation of cellular process;regulation of cellular response to stress;regulation of DNA metabolic process;regulation of DNA repair;regulation of macromolecule metabolic process;regulation of metabolic process;regulation of nitrogen compound metabolic process;regulation of nucleobase-containing compo…		cell part;cytoplasm;intracellular part								+	1.05487	-1.52348
Q2G2G7	SAOUHSC_01054	UPF0637 protein SAOUHSC_01054	0	0	6.64428	0	0	0	6.72099	6.70329	6.62737	0	0	6.57864	7.23045	7.22531	7.04532	0	0	0											+	2.88597	-2.78952
Q2G2G6	SAOUHSC_01050	DUF4064 domain-containing protein	7.88762	8.02119	8.15534	8.42975	8.23553	8.21219	8.68574	8.66932	8.5682	8.50243	8.62014	8.48001	8.77379	8.58206	8.67761	8.83315	8.79657	8.72181
Q2G2G5	SAOUHSC_01051	DUF4064 domain-containing protein	0	0	6.56647	0	0	0	6.9196	6.84634	6.86629	0	0	0	7.08636	7.04532	7.05308	0	0	0								+	2.6581	-1.73881	+	2.05702	-2.50042
Q2G2G4	SAOUHSC_01055	Inositol monophosphatase family protein, putative	0	0	0	0	0	0	0	0	0	0	0	0	0	0	0	6.38021	0	0
Q2G2G3	mntH	Divalent metal cation transporter MntH	6.71433	6.83251	7.01703	0	6.50844	0	6.95713	6.87157	6.80003	0	0	0	8.74819	8.82737	8.47129	8.2833	8.29003	8.2014	cation transport;establishment of localization;ion transport;metal ion transport;transport	active transmembrane transporter activity;binding;cation binding;ion binding;metal ion binding;secondary active transmembrane transporter activity;symporter activity;transmembrane transporter activity;transporter activity	cell part;integral to membrane;intrinsic to membrane;membrane;membrane part;plasma membrane					+	1.26128	-1.4501	+	1.71824	-1.40863
Q2G2G2	saeR	Response regulator SaeR	0	0	0	0	0	0	0	0	0	0	5.83756	0	0	0	0	0	0	0
Q2G2G1	SAOUHSC_00716	Uncharacterized protein	9.11059	9.0899	9.10721	9.12057	9.04139	8.95856	8.99739	9.04139	9.11727	9.22531	9.17898	9.26482	8.98989	9.17319	9.11059	8.94448	8.88762	8.92634								+	1.78712	0.56811	+	1.41909	-0.570517
Q2G2G0	SAOUHSC_00717	DM13 domain-containing protein	0	0	6.16322	0	0	0	0	0	0	0	0	0	0	0	0	0	0	0
Q2G2F8	atpF	ATP synthase subunit b	8.48996	8.45179	8.47129	8.17898	8.18469	8.3784	8.0086	8.07555	8.04532	8.27184	8.26482	8.25527	8.33244	8.34044	8.27184	8.21484	8.17319	8.19033	ATP biosynthetic process;ATP metabolic process;ATP synthesis coupled proton transport;biosynthetic process;cation transport;cellular biosynthetic process;cellular metabolic process;cellular nitrogen compound biosynthetic process;cellular nitrogen compound metabolic process;cellular process;energy coupled proton transport, down electrochemical gradient;establishment of localization;heterocycle bio…	cation transmembrane transporter activity;hydrogen ion transmembrane transporter activity;hydrogen ion transporting ATP synthase activity, rotational mechanism;inorganic cation transmembrane transporter activity;ion transmembrane transporter activity;monovalent inorganic cation transmembrane transporter activity;substrate-specific transmembrane transporter activity;substrate-specific transporter …	cell part;integral to membrane;intracellular part;intrinsic to membrane;macromolecular complex;membrane;membrane part;plasma membrane;protein complex;proton-transporting ATP synthase complex, coupling factor F(o);proton-transporting two-sector ATPase complex, proton-transporting domain	Oxidative phosphorylation;Photosynthesis	+	1.55023	-0.742971	+	3.42212	0.73355	+	2.10195	-0.405677
Q2G2F6	atpE	ATP synthase subunit c	7.7348	7.94399	8.00432	7.79934	7.58092	0	7.95472	7.92117	7.85974	7.73799	7.9345	7.8657	7.76492	7.86273	7.81157	7.82995	7.9345	7.8848
Q2G2F5	SAOUHSC_02352	UDP-N-acetylglucosamine 2-epimerase	7.2957	0	0	0	0	0	8.0569	8.00432	8.00432	0	0	0	7.84073	7.72591	7.94988	0	0	0	alcohol metabolic process;amino sugar metabolic process;carbohydrate metabolic process;cellular carbohydrate metabolic process;cellular metabolic process;cellular nitrogen compound metabolic process;cellular process;glucosamine metabolic process;metabolic process;monosaccharide metabolic process;N-acetylglucosamine metabolic process;nitrogen compound metabolic process;nucleobase-containing compou…	catalytic activity;isomerase activity;racemase and epimerase activity;racemase and epimerase activity, acting on carbohydrates and derivatives;UDP-N-acetylglucosamine 2-epimerase activity		Amino sugar and nucleotide sugar metabolism				+	3.1973	-4.80868	+	3.07152	-4.8381
Q2G2F4	atpB	ATP synthase subunit a	0	6.78247	6.82672	0	0	0	6.8202	6.81224	6.74351	6.80889	6.74429	6.82086	6.77815	6.74741	6.83187	0	6.77305	6.74741
Q2G2F3	traP	Signal transduction protein TRAP	7.5977	7.82086	7.81624	0	7.33244	7.49415	7.69723	7.77525	7.79449	7.79796	7.81425	7.88423	8.03743	8.13988	8.0086	7.95952	7.89321	7.93601	multi-organism process;pathogenesis		cell part;membrane		+	1.32105	-1.58155				+	1.39329	-0.439789
Q2G2F2	SAOUHSC_01966	Uncharacterized protein	6.81823	6.89098	6.8893	0	0	6.68372	6.62118	6.67302	6.64933	0	6.75484	6.80277	0	6.55267	6.63849	6.68753	6.58206	6.79865
Q2G2F1	SAOUHSC_01967	ABC transporter, ATP-binding protein, putative	0	0	0	0	0	0	0	0	0	0	0	0	0	6.10721	0	0	0	0
Q2G2F0	SAOUHSC_01968	HIT domain-containing protein	7.67302	7.72673	7.65992	0	0	0	7.8014	7.79309	7.77305	7.6149	7.63246	7.60206	7.93349	8.01703	7.98767	7.65514	7.64444	7.68931		catalytic activity			+	2.52699	-2.88278	+	3.84247	-0.573737	+	3.45902	-1.05117
Q2G2E5	SAOUHSC_00647	Uncharacterized protein	7.29226	7.25768	7.22531	0	0	0	7.25042	7.28103	7.27875	0	0	0	7.0569	7.01284	7.1038	0	0	0		active transmembrane transporter activity;adenyl nucleotide binding;adenyl ribonucleotide binding;ATP binding;ATPase activity;ATPase activity, coupled;ATPase activity, coupled to movement of substances;ATPase activity, coupled to transmembrane movement of substances;binding;catalytic activity;hydrolase activity;hydrolase activity, acting on acid anhydrides;hydrolase activity, acting on acid anhyd…	cell part;integral to membrane;intrinsic to membrane;membrane part		+	2.99962	-2.73652	+	2.04102	-2.48059	+	4.03646	-3.41093
Q2G2E4	SAOUHSC_00648	Uncharacterized protein	0	0	0	0	0	0	0	0	0	0	0	0	0	0	0	5.63849	0	0
Q2G2E2	SAOUHSC_00651	DUF2179 domain-containing protein	8.24055	8.18469	8.14922	0	0	0	7.90363	8.00432	7.8488	7.89265	7.82607	7.81157	7.86747	7.96802	7.7839	7.93752	7.99432	8.1038					+	3.52021	-5.50529
Q2G2E0	SAOUHSC_00633	Na_H_Exchanger domain-containing protein	6.83123	6.98091	6.94201	0	0	0	7.0086	6.90146	6.88762	6.80821	6.91645	6.9952	7.3032	7.38202	7.26482	6.99211	6.9284	6.96614		active transmembrane transporter activity;antiporter activity;cation transmembrane transporter activity;hydrogen ion transmembrane transporter activity;inorganic cation transmembrane transporter activity;ion transmembrane transporter activity;monovalent inorganic cation transmembrane transporter activity;secondary active transmembrane transporter activity;solute:cation antiporter activity;solute:…	cell part;integral to membrane;intrinsic to membrane;membrane part								+	3.08398	-1.17749
Q2G2D8	SAOUHSC_00634	ABC transporter, substrate-binding protein, putative	0	0	0	0	0	0	0	0	0	0	0	0	0	5.90091	0	0	0	0
Q2G2D7	SAOUHSC_02447	PKS_ER domain-containing protein	7.96095	8.2878	8.21484	8.50379	8.35984	8.13672	8.40483	8.58546	8.62737	8.27184	8.27416	8.22011	8.74351	8.69285	8.62531	8.65897	8.58092	8.63246		binding;catalytic activity;cation binding;ion binding;metal ion binding;oxidoreductase activity;transition metal ion binding;zinc ion binding						+	1.80149	-0.942932
Q2G2D6	SAOUHSC_02448	Uncharacterized protein	0	0	0	0	0	0	0	5.83163	0	0	0	0	0	0	0	0	0	0
Q2G2D3	rimP	Ribosome maturation factor RimP	6.74507	6.73078	6.82801	0	0	0	6.88309	6.90795	6.88309	6.71767	6.85914	6.7364	7.11394	7.34635	7.16435	6.84572	6.85914	6.90309	cellular component biogenesis;cellular component biogenesis at cellular level;cellular component organization or biogenesis;cellular component organization or biogenesis at cellular level;cellular process;ribonucleoprotein complex biogenesis;ribosomal small subunit biogenesis		cell part;cytoplasm;intracellular part					+	1.25138	-0.399661	+	2.01915	-1.1258
Q2G2D2	nusA	Transcription termination/antitermination protein NusA	7.38917	7.25527	7.33846	0	0	7.45326	7.5092	7.4216	7.48001	7.31175	7.32222	7.35218	7.48855	7.48855	7.47129	7.37658	7.24551	7.35793	biological regulation;biosynthetic process;cellular biosynthetic process;cellular macromolecule metabolic process;cellular metabolic process;cellular nitrogen compound metabolic process;cellular process;macromolecule metabolic process;metabolic process;nitrogen compound metabolic process;nucleic acid metabolic process;nucleobase-containing compound metabolic process;primary metabolic process;regu…	binding;nucleic acid binding;nucleic acid binding transcription factor activity;RNA binding;sequence-specific DNA binding transcription factor activity	cell part;cytoplasm;intracellular part					+	2.11745	-0.470227	+	1.71016	-0.518629
Q2G2D1	SAOUHSC_01244	YlxR domain-containing protein	6.48714	6.70672	6.64933	0	6.40663	0	6.69461	6.65896	6.70586	6.69548	6.75205	6.78675	0	6.77012	0	6.85003	6.69197	6.81558
Q2G2D0	infB	Translation initiation factor IF-2	7.50243	7.38021	7.60746	7.82737	7.83569	7.71096	7.19866	7.24797	7.32838	6.97497	6.85248	6.96142	7.2014	7.17319	7.26717	6.83632	6.81157	6.83123		binding;catalytic activity;GTP binding;GTPase activity;guanyl nucleotide binding;guanyl ribonucleotide binding;hydrolase activity;hydrolase activity, acting on acid anhydrides;hydrolase activity, acting on acid anhydrides, in phosphorus-containing anhydrides;nucleic acid binding;nucleoside-triphosphatase activity;nucleotide binding;purine nucleotide binding;purine ribonucleoside triphosphate bind…	cell part;cytoplasm;intracellular part		+	1.72836	0.978783	+	2.42945	-1.09196	+	3.75051	-1.28739
Q2G2C9	SAOUHSC_01245	Ribosomal_L7Ae domain-containing protein	6.68034	6.66464	6.75587	0	0	0	6.7356	6.74429	6.66087	6.50651	6.71181	6.75967	6.64048	6.66839	6.66181	6.6149	6.6637	6.62221
Q2G2C4	tarI	Ribitol-5-phosphate cytidylyltransferase 2	0	0	0	0	0	0	0	0	0	0	0	0	0	0	0	6.52375	0	0
Q2G2C3	SAOUHSC_01062	UPF0358 protein SAOUHSC_01062	7.27646	7.5611	7.34044	7.90956	7.90146	7.71517	7.35603	7.17609	7.1038	7.4624	7.51587	7.59218	0	0	0	0	0	0					+	1.86239	1.49285	+	1.68588	1.03481
Q2G2C2	SAOUHSC_01063	Uncharacterized protein	0	0	0	0	0	6.83801	0	0	0	0	0	0	0	0	0	0	0	0
Q2G2C1	SAOUHSC_01064	Pyruvate carboxylase	0	0	0	0	0	0	0	6.7355	0	0	0	0	7.0607	7.18469	6.95037	0	0	0
Q2G2B6	SAOUHSC_00215	PTS system component, putative	8.02531	8.00432	8.03342	7.92169	7.98272	7.97405	7.66558	7.72346	7.87737	7.943	7.93044	7.96614	7.88252	8.08636	7.94939	7.59329	7.78176	7.66839	carbohydrate transport;establishment of localization;organic substance transport;phosphoenolpyruvate-dependent sugar phosphotransferase system;transport	active transmembrane transporter activity;carbohydrate transmembrane transporter activity;catalytic activity;phosphotransferase activity, alcohol group as acceptor;protein-N(PI)-phosphohistidine-sugar phosphotransferase activity;substrate-specific transmembrane transporter activity;substrate-specific transporter activity;transferase activity;transferase activity, transferring phosphorus-containin…		Galactose metabolism;Phosphotransferase system (PTS)	+	1.37179	-0.204398	+	1.39109	0.63468	+	1.63885	-0.968727
Q2G2B2	sasG	Surface protein G	0	0	0	0	0	0	0	6.16313	0	0	0	0	0	0	0	0	0	0
Q2G2A8	SAOUHSC_01049	Spermidine/putrescine ABC transporter, spermidine/putrescine-binding protein, putative	0	0	0	0	6.85999	0	0	0	0	6.76567	6.85914	6.71096	0	0	0	0	6.72591	0
Q2G2A7	potA	Spermidine/putrescine import ATP-binding protein PotA	0	0	6.41692	0	0	0	6.32539	0	0	0	0	0	0	6.21219	0	0	0	0
Q2G2A5	SAOUHSC_01041	Pyruvate dehydrogenase complex, E1 component, pyruvate dehydrogenase beta subunit, putative	7.84073	7.60638	7.63949	0	0	0	7.91645	7.83759	7.89154	7.48996	7.60423	7.62531	7.65418	7.6981	7.62839	7.64738	7.5092	7.62221		catalytic activity;oxidoreductase activity;oxidoreductase activity, acting on the aldehyde or oxo group of donors;oxidoreductase activity, acting on the aldehyde or oxo group of donors, disulfide as acceptor;pyruvate dehydrogenase (acetyl-transferring) activity;pyruvate dehydrogenase activity		Butanoate metabolism;Citrate cycle (TCA cycle);Glycolysis / Gluconeogenesis;Pyruvate metabolism;Valine, leucine and isoleucine biosynthesis	+	2.05414	-2.90126	+	2.51998	-1.02546
Q2G2A4	SAOUHSC_01042	Dihydrolipoamide acetyltransferase component of pyruvate dehydrogenase complex	0	0	0	0	0	0	0	0	0	0	0	0	0	0	6.40312	0	0	0
Q2G2A3	SAOUHSC_01043	Dihydrolipoyl dehydrogenase	0	0	0	0	0	0	6.79657	6.77743	6.86392	0	0	0	6.91116	6.97451	6.88593	0	0	0	biological regulation;cell redox homeostasis;cellular homeostasis;cellular process;homeostatic process;regulation of biological process;regulation of biological quality;regulation of cellular process	binding;catalytic activity;coenzyme binding;cofactor binding;dihydrolipoyl dehydrogenase activity;flavin adenine dinucleotide binding;oxidoreductase activity;oxidoreductase activity, acting on a sulfur group of donors;oxidoreductase activity, acting on a sulfur group of donors, NAD or NADP as acceptor;oxidoreductase activity, acting on NADH or NADPH		Citrate cycle (TCA cycle);Glycine, serine and threonine metabolism;Glycolysis / Gluconeogenesis;Pyruvate metabolism;Valine, leucine and isoleucine degradation							+	1.63161	-2.68168
Q2G2A2	SAOUHSC_01044	UPF0223 protein SAOUHSC_01044	0	0	0	0	0	0	6.90037	6.87099	6.993	0	0	0	6.93197	6.96942	7.08991	0	0	0					+	1.32041	0.756908	+	1.26672	-1.74482	+	2.9464	-1.49465
Q2G2A1	SAOUHSC_01692	CMP/dCMP-type deaminase domain-containing protein	0	6.85733	6.8169	0	0	0	6.91434	6.83251	6.94988	0	0	6.96895	7.01284	6.98989	7.11727	6.95665	0	6.87967	cellular metabolic process;cellular nitrogen compound metabolic process;cellular process;heterocycle metabolic process;metabolic process;nitrogen compound metabolic process;nucleobase-containing compound metabolic process;nucleobase-containing small molecule metabolic process;nucleoside phosphate metabolic process;nucleotide metabolic process;primary metabolic process;pyrimidine nucleotide metabo…	binding;catalytic activity;cation binding;dCMP deaminase activity;deaminase activity;hydrolase activity;hydrolase activity, acting on carbon-nitrogen (but not peptide) bonds;hydrolase activity, acting on carbon-nitrogen (but not peptide) bonds, in cyclic amidines;ion binding;metal ion binding;transition metal ion binding;zinc ion binding		Pyrimidine metabolism							+	1.32968	-0.491382
Q2G2A0	SAOUHSC_01694	Methyltransf_25 domain-containing protein	0	6.716	6.74036	0	0	0	7.28103	7.33041	7.30963	0	0	0	7.27646	7.46389	7.4216	0	0	0								+	3.64221	-3.05344	+	3.00034	-2.66747
Q2G298	rsfS	Ribosomal silencing factor RsfS	7.32428	7.3784	7.3927	0	7.19151	0	7.66181	7.55871	7.50786	7.3483	7.37291	7.38917	6.92583	7.24797	6.88196	7.16137	7.17319	7.19312	biological regulation;cellular component assembly;cellular component assembly at cellular level;cellular component organization;cellular component organization at cellular level;cellular component organization or biogenesis;cellular component organization or biogenesis at cellular level;cellular macromolecular complex assembly;cellular macromolecular complex subunit organization;cellular process;…		cell part;cytoplasm;intracellular part					+	1.93206	-0.684311
Q2G297	SAOUHSC_01696	HD domain-containing protein	6.87622	6.85248	6.89098	7.06371	0	0	6.92065	7	7.0569	6.90795	7.04532	6.96284	6.96142	7.233	7.06819	6.88649	6.94988	6.99034
Q2G296	fhs	Formate--tetrahydrofolate ligase	0	0	0	0	0	0	0	0	6.32997	0	0	0	0	0	0	0	0	0
Q2G295	SAOUHSC_01850	Catabolite control protein A	0	0	0	0	0	0	0	0	6.37546	0	0	0	0	0	0	0	0	0
Q2G294	SAOUHSC_01846	Acyl-CoA synthetase	0	0	0	0	0	0	0	0	0	0	6.17397	0	0	0	0	0	0	0
Q2G285	SAOUHSC_02692	Antitoxin	6.77159	6.70927	6.78319	0	6.67117	6.90526	6.68574	6.60959	6.58433	0	0	0	0	6.4014	0	0	0	0
Q2G283	hemL2	Glutamate-1-semialdehyde 2,1-aminomutase 2	7.3032	7.22789	7.31175	7.45025	7.45332	7.5682	0	0	0	0	6.77327	0	0	0	0	0	0	0	biosynthetic process;cellular aromatic compound metabolic process;cellular biosynthetic process;cellular metabolic process;cellular nitrogen compound biosynthetic process;cellular nitrogen compound metabolic process;cellular process;cofactor biosynthetic process;cofactor metabolic process;heterocycle biosynthetic process;heterocycle metabolic process;metabolic process;nitrogen compound metabolic …	binding;catalytic activity;cofactor binding;glutamate-1-semialdehyde 2,1-aminomutase activity;intramolecular transferase activity;intramolecular transferase activity, transferring amino groups;isomerase activity;pyridoxal phosphate binding;transaminase activity;transferase activity;transferase activity, transferring nitrogenous groups;vitamin B6 binding;vitamin binding	cell part;cytoplasm;intracellular part	Porphyrin and chlorophyll metabolism	+	1.94993	0.696423
Q2G282	perR	Peroxide-responsive repressor PerR	0	0	0	0	0	0	0	0	0	0	7.64115	0	0	0	0	0	0	0
Q2G281	SAOUHSC_01998	Uncharacterized protein	0	0	0	0	0	0	0	0	0	0	0	5.90417	0	0	0	0	0	0
Q2G280	SAOUHSC_01999	NADH-dependent peroxiredoxin	0	0	0	0	0	0	6.71349	6.71012	6.80277	0	0	0	6.86747	6.993	6.80072	6.5955	0	6.69723		antioxidant activity;catalytic activity;oxidoreductase activity			+	1.52837	1.59759				+	1.47997	-1.05282
Q2G278	SAOUHSC_00773	Probable autolysin LDP	7.32015	7.46982	7.45939	7.76343	7.73719	7.77379	7.07555	7.00432	7.18752	7.03342	6.97267	7.03342	6.75435	6.75511	6.94694	0	0	0					+	2.63763	1.13504				+	1.10316	-0.716671
Q2G277	SAOUHSC_00774	Uncharacterized protein	7.78958	7.79796	7.82995	0	7.52892	7.72428	7.65514	7.79796	7.63849	7.55388	7.65225	7.66464	7.61595	7.6637	7.63949	7.85974	7.92531	7.82347		molecular transducer activity;signal transducer activity									+	2.65879	0.763365
Q2G276	SAOUHSC_00003	S4 RNA-binding domain-containing protein	8.34242	8.4609	8.36549	8.07918	8.29885	8.2014	9.94743	9.8651	9.79796	8.99078	9.08279	9.01703	9.59439	9.52504	9.53908	9.78817	9.617	9.58433		binding;nucleic acid binding;RNA binding			+	1.26012	-0.652623	+	4.09396	-2.79031
Q2G275	recF	DNA replication and repair protein RecF	8.53908	8.62531	8.52634	8.22272	8.56703	8.13672	10.1206	9.989	10.0531	9.16137	9.32838	9.17026	9.48855	9.40824	9.52244	9.88138	9.79796	9.85914	biosynthetic process;cell communication;cellular biosynthetic process;cellular macromolecule biosynthetic process;cellular macromolecule metabolic process;cellular metabolic process;cellular nitrogen compound metabolic process;cellular process;cellular response to external stimulus;cellular response to extracellular stimulus;cellular response to stimulus;cellular response to stress;DNA metabolic …	adenyl nucleotide binding;adenyl ribonucleotide binding;ATP binding;binding;DNA binding;nucleic acid binding;nucleotide binding;purine nucleotide binding;purine ribonucleoside triphosphate binding;purine ribonucleotide binding;ribonucleotide binding;single-stranded DNA binding;structure-specific DNA binding	cell part;cytoplasm;intracellular part	Homologous recombination				+	3.64089	-2.77121	+	3.04963	1.23935
Q2G274	gyrB	DNA gyrase subunit B	6.16732	6.43457	0	0	0	0	8.32428	8.27184	8.31175	7.2878	7.35793	6.78675	8.88309	8.76343	8.83948	9.21484	9.18752	9.13033	biosynthetic process;cellular biosynthetic process;cellular macromolecule biosynthetic process;cellular macromolecule metabolic process;cellular metabolic process;cellular nitrogen compound metabolic process;cellular process;DNA conformation change;DNA metabolic process;DNA replication;DNA topological change;DNA-dependent DNA replication;macromolecule biosynthetic process;macromolecule metabolic …	adenyl nucleotide binding;adenyl ribonucleotide binding;ATP binding;ATPase activity;ATPase activity, coupled;binding;catalytic activity;cation binding;DNA binding;DNA topoisomerase (ATP-hydrolyzing) activity;DNA topoisomerase activity;DNA-dependent ATPase activity;hydrolase activity;hydrolase activity, acting on acid anhydrides;hydrolase activity, acting on acid anhydrides, in phosphorus-containi…	cell part;chromosome;cytoplasm;intracellular non-membrane-bounded organelle;intracellular organelle;intracellular part;non-membrane-bounded organelle;organelle					+	2.5183	-3.84833	+	2.90445	1.15902
Q2G273	ureG	Urease accessory protein UreG	9.16435	9.14922	8.97818	9.4133	9.56585	9.47712	8.93902	8.92686	8.86034	9.43457	9.54033	9.43297	9.14301	9.01703	8.98363	9.62118	9.5563	9.63649	metabolic process;nitrogen compound metabolic process	binding;catalytic activity;cation binding;GTP binding;GTPase activity;guanyl nucleotide binding;guanyl ribonucleotide binding;hydrolase activity;hydrolase activity, acting on acid anhydrides;hydrolase activity, acting on acid anhydrides, in phosphorus-containing anhydrides;ion binding;metal ion binding;nickel ion binding;nucleoside-triphosphatase activity;nucleotide binding;purine nucleotide bind…	cell part;cytoplasm;intracellular part		+	2.19333	1.28948	+	3.69429	1.86211	+	3.28934	1.84953
Q2G270	SAOUHSC_02568	bPH_3 domain-containing protein	0	0	0	0	0	0	0	0	0	0	0	6.64246	0	0	0	0	0	0
Q2G268	coaBC	Coenzyme A biosynthesis bifunctional protein CoaBC	8.38382	8.13354	8.51322	6.90037	6.86392	0	8.67669	8.74351	8.82282	7.4133	7.4183	6.9345	8.74273	8.9196	8.76938	7.5092	7.78032	7.32838	amine catabolic process;amine metabolic process;biosynthetic process;carboxylic acid catabolic process;carboxylic acid metabolic process;catabolic process;cellular amine metabolic process;cellular amino acid catabolic process;cellular amino acid metabolic process;cellular biosynthetic process;cellular catabolic process;cellular ketone metabolic process;cellular metabolic process;cellular modified…	acid-amino acid ligase activity;binding;carbon-carbon lyase activity;carboxy-lyase activity;catalytic activity;coenzyme binding;cofactor binding;FMN binding;ligase activity;ligase activity, forming carbon-nitrogen bonds;lyase activity;nucleotide binding;phosphopantothenate--cysteine ligase activity;phosphopantothenoylcysteine decarboxylase activity		Pantothenate and CoA biosynthesis	+	3.5008	-5.08715	+	3.07279	-4.95734	+	3.06021	-4.22306
Q2G266	priA	Primosomal protein N	8.18752	8.17319	8.16137	7.97174	7.98677	7.95713	8.22531	8.14922	8.18184	8.02119	8.08279	7.97313	7.81491	7.80754	7.85309	8.03342	8.03743	8.03342	biosynthetic process;cellular biosynthetic process;cellular macromolecule metabolic process;cellular metabolic process;cellular nitrogen compound metabolic process;cellular process;DNA conformation change;DNA duplex unwinding;DNA geometric change;DNA metabolic process;DNA replication, synthesis of RNA primer;DNA unwinding involved in replication;macromolecule metabolic process;metabolic process;n…	adenyl nucleotide binding;adenyl ribonucleotide binding;ATP binding;ATPase activity;ATPase activity, coupled;ATP-dependent DNA helicase activity;ATP-dependent helicase activity;binding;catalytic activity;cation binding;DNA binding;DNA helicase activity;DNA-dependent ATPase activity;helicase activity;hydrolase activity;hydrolase activity, acting on acid anhydrides;hydrolase activity, acting on aci…		Homologous recombination	+	4.2231	-0.671511	+	1.84048	-0.530699	+	3.91371	0.696206
Q2G265	def	Peptide deformylase	6.59882	0	0	0	0	0	0	0	0	0	0	6.48996	0	0	0	0	0	0
Q2G263	SAOUHSC_00096	Transcriptional regulator, GntR family, putative	7.08636	6.94349	7.08991	0	0	0	7.12385	7.06446	7.13033	7.13672	7.06819	7.18752	6.97405	6.94349	7.09342	6.98543	7.02938	7.11059
Q2G261	sodM	Superoxide dismutase [Mn/Fe] 2	0	0	0	0	0	0	0	0	0	0	0	0	0	5.91434	0	0	0	0
Q2G260	SAOUHSC_00094	Uncharacterized protein SAOUHSC_00094	7.13988	7.06819	7.13672	0	0	0	7.21748	7.22531	7.23045	0	0	0	6.77525	6.81823	6.82607	6.8202	0	6.81425			extracellular region					+	1.65993	-2.35208
Q2G258	birA	Bifunctional ligase/repressor BirA	8.21748	8.08636	8.09691	7.60746	7.62839	7.28103	8.07188	7.97909	7.91275	7.76716	7.70842	7.80618	7.50106	7.4014	7.08636	7.58771	7.36361	7.55023	biological regulation;biosynthetic process;cellular biosynthetic process;cellular macromolecule biosynthetic process;cellular macromolecule metabolic process;cellular metabolic process;cellular nitrogen compound metabolic process;cellular process;cellular protein metabolic process;macromolecule biosynthetic process;macromolecule metabolic process;macromolecule modification;metabolic process;nitro…	adenyl nucleotide binding;adenyl ribonucleotide binding;ATP binding;binding;biotin-[acetyl-CoA-carboxylase] ligase activity;biotin-protein ligase activity;catalytic activity;DNA binding;ligase activity;ligase activity, forming carbon-nitrogen bonds;nucleic acid binding;nucleotide binding;purine nucleotide binding;purine ribonucleoside triphosphate binding;purine ribonucleotide binding;ribonucleot…		Biotin metabolism	+	2.19495	-2.08603	+	1.86159	-0.755154
Q2G257	SAOUHSC_01477	Uncharacterized protein	8.22789	8.1959	8.15229	8.36922	8.34635	8.29447	7.83822	7.73078	7.81358	7.55023	7.52375	7.65706	0	0	0	0	0	0					+	2.01394	0.480529	+	1.85195	-0.721469
Q2G255	SAOUHSC_01475	Uncharacterized protein	0	0	6.03535	0	0	0	0	0	0	0	0	0	0	0	0	0	0	0
Q2G254	SAOUHSC_01476	MazG domain-containing protein	8.06446	7.9248	7.94498	0	0	0	7.52114	7.62839	7.43136	0	0	0	7.06819	7.00432	7.13354	6.04139	0	0					+	2.76686	-3.61835	+	2.53356	-4.17838	+	1.85992	-2.3631
Q2G253	SAOUHSC_00025	GRAM_POS_ANCHORING domain-containing protein	7.12057	7.05308	7.14613	0	0	0	6.92531	6.85552	6.86273	0	0	0	0	0	0	0	0	0	catabolic process;cellular catabolic process;cellular metabolic process;cellular nitrogen compound catabolic process;cellular nitrogen compound metabolic process;cellular process;metabolic process;nitrogen compound metabolic process;nucleobase-containing compound catabolic process;nucleobase-containing compound metabolic process;nucleobase-containing small molecule metabolic process;nucleoside ph…	binding;catalytic activity;cation binding;hydrolase activity;hydrolase activity, acting on ester bonds;ion binding;metal ion binding;nucleotide binding						+	1.79598	-1.79395
Q2G252	rlmH	Ribosomal RNA large subunit methyltransferase H	6.7731	0	0	0	0	0	6.7791	0	0	0	0	0	0	0	0	0	0	0
Q2G248	SAOUHSC_01852	Chorismate mutase domain-containing protein	0	0	0	0	0	0	0	0	0	0	0	0	0	0	0	0	0	0
Q2G247	SAOUHSC_01855	UPF0478 protein SAOUHSC_01855	0	0	0	0	0	0	0	0	0	0	0	0	0	0	0	0	0	0
Q2G245	SAOUHSC_01854	Uncharacterized protein	0	0	6.36222	0	0	0	0	0	0	0	0	0	0	0	0	0	0	0
Q2G243	radA	DNA repair protein RadA	6.02938	0	6.13354	0	0	0	6.20683	6.23553	0	0	6.03096	6.27875	5.98046	6.0086	0	0	0	6.19312
Q2G242	SAOUHSC_00508	TRAM domain-containing protein	0	7.4183	7.45332	0	0	0	7.41497	0	7.4609	0	0	0	0	0	0	0	0	0
Q2G241	gltX	Glutamate--tRNA ligase	7.43297	7.47712	7.41497	7.47712	7.47276	7.52892	6.86806	6.92324	7.03743	0	0	0	7.13988	7.17609	7.13354	0	0	0	amine metabolic process;amino acid activation;carboxylic acid metabolic process;cellular amine metabolic process;cellular amino acid metabolic process;cellular ketone metabolic process;cellular macromolecule metabolic process;cellular metabolic process;cellular nitrogen compound metabolic process;cellular process;glutamyl-tRNA aminoacylation;macromolecule metabolic process;metabolic process;ncRNA…	adenyl nucleotide binding;adenyl ribonucleotide binding;aminoacyl-tRNA ligase activity;ATP binding;binding;catalytic activity;glutamate-tRNA ligase activity;ligase activity;ligase activity, forming aminoacyl-tRNA and related compounds;ligase activity, forming carbon-oxygen bonds;nucleic acid binding;nucleotide binding;purine nucleotide binding;purine ribonucleoside triphosphate binding;purine rib…	cell part;cytoplasm;intracellular part	Aminoacyl-tRNA biosynthesis				+	2.05924	-1.70225
Q2G240	SAOUHSC_00706	Lactose phosphotransferase system repressor	7.5563	7.47567	7.52892	7.41497	7.4183	7.59439	7.61595	7.47712	7.4609	7.46687	7.5611	7.67486	6.97451	7.08991	7.03743	7.49554	7.53148	7.5955	biosynthetic process;cellular biosynthetic process;cellular macromolecule biosynthetic process;cellular macromolecule metabolic process;cellular metabolic process;cellular nitrogen compound metabolic process;cellular process;macromolecule biosynthetic process;macromolecule metabolic process;metabolic process;nitrogen compound metabolic process;nucleic acid metabolic process;nucleobase-containing …	binding;DNA binding;nucleic acid binding;nucleic acid binding transcription factor activity;sequence-specific DNA binding transcription factor activity	cell part;intracellular								+	3.47571	1.68386
Q2G239	SAOUHSC_00708	EIIA	7.42325	7.36549	7.37658	0	7.21672	0	7.42651	7.43775	7.38021	7.1038	7.12385	7.22272	7.16137	7.06446	7.14922	7.22789	7.17898	7.19312	carbohydrate transport;establishment of localization;organic substance transport;phosphoenolpyruvate-dependent sugar phosphotransferase system;transport	active transmembrane transporter activity;carbohydrate transmembrane transporter activity;catalytic activity;cation transmembrane transporter activity;cation:sugar symporter activity;fructose transmembrane transporter activity;hexose transmembrane transporter activity;ion transmembrane transporter activity;monosaccharide transmembrane transporter activity;phosphotransferase activity, alcohol grou…	cell part;integral to membrane;intrinsic to membrane;membrane;membrane part;plasma membrane	Fructose and mannose metabolism;Phosphotransferase system (PTS)	+	1.39167	-1.69732	+	2.53785	-0.879315	+	1.04306	0.249082
Q2G238	SAOUHSC_00707	Tagatose-6-phosphate kinase	0	0	0	0	0	0	0	0	0	0	0	0	0	0	0	0	0	6.94002
Q2G236	nadE	NH(3)-dependent NAD(+) synthetase	8.10037	8.0569	8.01284	7.7796	8.02938	8.02531	8.1271	8.07555	8.13672	7.98722	7.99564	7.96802	7.97681	7.92531	8.00432	7.92273	7.80889	7.88138	biosynthetic process;cellular biosynthetic process;cellular metabolic process;cellular nitrogen compound biosynthetic process;cellular nitrogen compound metabolic process;cellular process;coenzyme biosynthetic process;coenzyme metabolic process;cofactor biosynthetic process;cofactor metabolic process;heterocycle biosynthetic process;heterocycle metabolic process;metabolic process;NAD biosynthetic…	acid-ammonia (or amide) ligase activity;adenyl nucleotide binding;adenyl ribonucleotide binding;ATP binding;binding;carbon-nitrogen ligase activity, with glutamine as amido-N-donor;catalytic activity;ligase activity;ligase activity, forming carbon-nitrogen bonds;NAD+ synthase (glutamine-hydrolyzing) activity;NAD+ synthase activity;nucleotide binding;purine nucleotide binding;purine ribonucleoside…		Nicotinate and nicotinamide metabolism;Nitrogen metabolism				+	2.47945	-0.430192	+	1.13485	-0.324936
Q2G235	SAOUHSC_02133	Nicotinate phosphoribosyltransferase	7.5092	7.5832	7.48714	7.79099	7.7356	7.76343	7.63849	7.68664	7.86392	7.5172	7.56937	7.5682	7.72181	7.94988	7.98227	7.47857	7.60206	7.54777	biosynthetic process;cellular biosynthetic process;cellular metabolic compound salvage;cellular metabolic process;cellular nitrogen compound biosynthetic process;cellular nitrogen compound metabolic process;cellular process;coenzyme biosynthetic process;coenzyme metabolic process;cofactor biosynthetic process;cofactor metabolic process;heterocycle biosynthetic process;heterocycle metabolic proces…	catalytic activity;ligase activity;nicotinate phosphoribosyltransferase activity;nicotinate-nucleotide diphosphorylase (carboxylating) activity;transferase activity;transferase activity, transferring glycosyl groups;transferase activity, transferring pentosyl groups		Nicotinate and nicotinamide metabolism	+	2.69186	0.786716	+	1.18476	-0.591603	+	1.72764	-1.13561
Q2G234	SAOUHSC_02134	Nitric oxide synthase oxygenase	8.02938	8.19866	8.11059	8.26482	8.11394	0	7.94841	8.07188	7.96661	7.92583	8.13354	8.15534	7.49831	7.46538	7.75358	7.80686	8.13988	7.88705	biosynthetic process;cellular biosynthetic process;cellular metabolic process;cellular nitrogen compound biosynthetic process;cellular nitrogen compound metabolic process;cellular process;metabolic process;nitric oxide biosynthetic process;nitric oxide metabolic process;nitrogen compound metabolic process	binding;catalytic activity;cation binding;heme binding;ion binding;iron ion binding;metal ion binding;monooxygenase activity;nitric-oxide synthase activity;oxidoreductase activity;oxidoreductase activity, acting on paired donors, with incorporation or reduction of molecular oxygen;oxidoreductase activity, acting on paired donors, with incorporation or reduction of molecular oxygen, NADH or NADPH …		Arginine and proline metabolism							+	1.28761	1.23633
Q2G233	SAOUHSC_02135	Prephenate dehydratase	0	0	0	0	0	0	0	0	0	0	0	6.06446	0	0	0	0	0	0
Q2G230	tmk	Thymidylate kinase	0	0	0	0	0	0	0	0	6.56373	0	0	0	0	0	0	0	0	0
Q2G229	SAOUHSC_00452	Uncharacterized protein	0	0	0	0	0	0	0	0	0	0	0	0	0	6.53656	0	0	0	0
Q2G227	deoB	Phosphopentomutase	7.67486	7.74507	7.7364	7.5832	7.62428	0	7.85673	7.76641	7.76492	7.79518	7.7679	7.86094	7.79449	7.84572	7.82607	7.76492	7.70243	7.72181	5-phosphoribose 1-diphosphate biosynthetic process;5-phosphoribose 1-diphosphate metabolic process;alcohol biosynthetic process;alcohol metabolic process;biosynthetic process;carbohydrate biosynthetic process;carbohydrate metabolic process;catabolic process;cellular biosynthetic process;cellular carbohydrate biosynthetic process;cellular carbohydrate metabolic process;cellular catabolic process;c…	binding;catalytic activity;cation binding;intramolecular transferase activity;intramolecular transferase activity, phosphotransferases;ion binding;isomerase activity;magnesium ion binding;manganese ion binding;metal ion binding;phosphopentomutase activity;transition metal ion binding	cell part;cytoplasm;intracellular part	Pentose phosphate pathway;Purine metabolism							+	1.7524	-0.306854
Q2G224	deoC	Deoxyribose-phosphate aldolase	6.74819	6.92531	6.81954	0	0	0	6.73239	6.75128	6.71433	0	0	0	6.83759	6.85003	6.86864	6.82282	0	6.70415	carbohydrate catabolic process;carbohydrate metabolic process;catabolic process;cellular catabolic process;cellular metabolic process;cellular nitrogen compound catabolic process;cellular nitrogen compound metabolic process;cellular process;deoxyribonucleotide catabolic process;deoxyribonucleotide metabolic process;deoxyribose phosphate catabolic process;deoxyribose phosphate metabolic process;me…	aldehyde-lyase activity;carbon-carbon lyase activity;catalytic activity;deoxyribose-phosphate aldolase activity;lyase activity	cell part;cytoplasm;intracellular part	Pentose phosphate pathway				+	1.69508	-1.37108
Q2G223	SAOUHSC_02976	Mannose-6-phosphate isomerase	7.95617	7.90956	7.92428	0	7.76623	0	8.36736	8.47422	8.39967	8.0899	8.16137	8.13672	8.44716	8.36922	8.45484	8.49554	8.5955	8.66087	carbohydrate metabolic process;metabolic process;primary metabolic process	binding;catalytic activity;cation binding;intramolecular oxidoreductase activity;intramolecular oxidoreductase activity, interconverting aldoses and ketoses;ion binding;isomerase activity;mannose-6-phosphate isomerase activity;metal ion binding;transition metal ion binding;zinc ion binding		Amino sugar and nucleotide sugar metabolism;Fructose and mannose metabolism				+	2.77061	-0.944815	+	1.3541	0.53227
Q2G222	SAOUHSC_02979	N-acetylmuramoyl-L-alanine amidase domain-containing protein SAOUHSC_02979	0	0	0	0	0	0	0	0	0	0	0	0	6.48996	0	6.49415	0	0	0
Q2G221	SAOUHSC_02978	Phage infection protein, putative	7.62941	7.75587	7.75587	7.5302	7.49969	7.66745	7.76492	7.64738	7.84261	7.49693	7.53908	7.63849	7.55023	7.51054	7.58092	7.54407	7.55751	7.63043								+	1.28536	-0.642705
Q2G220	SAOUHSC_02980	Isochorismatase domain-containing protein	6.69984	6.71684	7.00432	0	6.6902	6.87737	7.17609	7.24304	7.10037	6.80821	6.4843	6.79865	7.82347	8.02938	7.83315	7.37107	7.23805	7.32634		catalytic activity						+	1.8537	-1.58161	+	2.77541	-1.93841
Q2G219	SAOUHSC_00209	PTS system, glucose-specific IIBC component, putative	6.96284	6.91855	6.96473	0	0	7.03691	7.03743	6.95279	6.82413	0	6.95511	0	6.69984	0	0	0	0	0
Q2G218	ldh1	L-lactate dehydrogenase 1	0	0	6.36421	0	0	0	6.36736	0	6.4183	0	6.53219	0	6.46538	0	6.38202	0	0	0	alcohol catabolic process;alcohol metabolic process;carbohydrate catabolic process;carbohydrate metabolic process;catabolic process;cellular carbohydrate catabolic process;cellular carbohydrate metabolic process;cellular metabolic process;cellular process;generation of precursor metabolites and energy;glucose catabolic process;glucose metabolic process;glycolysis;hexose catabolic process;hexose m…	catalytic activity;lactate dehydrogenase activity;L-lactate dehydrogenase activity;oxidoreductase activity;oxidoreductase activity, acting on CH-OH group of donors;oxidoreductase activity, acting on the CH-OH group of donors, NAD or NADP as acceptor	cell part;cytoplasm;intracellular part	Cysteine and methionine metabolism;Glycolysis / Gluconeogenesis;Propanoate metabolism;Pyruvate metabolism	+	2.92847	1.60198
Q2G217	SAOUHSC_00211	IU_nuc_hydro domain-containing protein	0	0	0	0	0	0	6.49831	6.45637	0	0	0	0	6.68574	0	6.69636	0	0	0
Q2G204	SAOUHSC_00942	GTP pyrophosphokinase, putative	6.55023	0	6.57054	0	0	0	6.55023	0	0	0	0	0	6.63548	0	0	0	0	0
Q2G202	SAOUHSC_00939	Uncharacterized protein	7.06819	6.94841	7.02119	7.12385	0	7.06446	6.72016	6.86213	6.83696	0	0	6.65128	6.89321	6.91908	6.71933	0	0	0	establishment of localization;gas transport;oxygen transport;transport	binding;cation binding;heme binding;ion binding;iron ion binding;metal ion binding;oxygen binding;tetrapyrrole binding;transition metal ion binding						+	1.23149	-1.2487	+	1.77874	-1.92642
Q2G201	SAOUHSC_00940	CYTH domain-containing protein	0	8.03743	7.92221	0	0	0	8.05381	0	0	0	0	0	7.97955	0	7.85431	0	0	0
Q2G200	SAOUHSC_00941	UPF0738 protein SAOUHSC_00941	7.10237	0	0	0	0	0	0	0	0	0	0	0	6.83251	6.92993	0	6.94201	0	0
Q2G1Z9	nadK	NAD kinase	0	7.17609	7.11727	0	0	0	6.91275	7.02938	6.90633	0	0	0	0	6.71181	0	6.86034	0	0	biosynthetic process;cellular biosynthetic process;cellular metabolic process;cellular nitrogen compound biosynthetic process;cellular nitrogen compound metabolic process;cellular process;coenzyme biosynthetic process;coenzyme metabolic process;cofactor biosynthetic process;cofactor metabolic process;heterocycle biosynthetic process;heterocycle metabolic process;metabolic process;NAD metabolic pr…	adenyl nucleotide binding;adenyl ribonucleotide binding;ATP binding;binding;catalytic activity;cation binding;ion binding;kinase activity;metal ion binding;NAD+ kinase activity;nucleotide binding;phosphotransferase activity, alcohol group as acceptor;purine nucleotide binding;purine ribonucleoside triphosphate binding;purine ribonucleotide binding;ribonucleotide binding;transferase activity;trans…	cell part;cytoplasm;intracellular part	Nicotinate and nicotinamide metabolism				+	1.62808	-2.266
Q2G1Z8	polC	DNA polymerase III PolC-type	0	6.88024	6.82086	0	0	0	0	6.80691	0	0	0	0	6.96095	7.17319	6.99564	0	0	0	biosynthetic process;cellular biosynthetic process;cellular macromolecule biosynthetic process;cellular macromolecule metabolic process;cellular metabolic process;cellular nitrogen compound metabolic process;cellular process;DNA metabolic process;DNA replication;DNA-dependent DNA replication;macromolecule biosynthetic process;macromolecule metabolic process;metabolic process;nitrogen compound met…	3'-5' exonuclease activity;binding;catalytic activity;DNA binding;DNA polymerase activity;DNA-directed DNA polymerase activity;exonuclease activity;hydrolase activity;hydrolase activity, acting on ester bonds;nuclease activity;nucleic acid binding;nucleotidyltransferase activity;transferase activity;transferase activity, transferring phosphorus-containing groups	cell part;cytoplasm;intracellular part	DNA replication;Homologous recombination;Mismatch repair;Purine metabolism;Pyrimidine metabolism							+	1.93676	-2.06232
Q2G1Z7	SAOUHSC_01237	Isoprenyl transferase	0	0	0	0	0	0	0	0	0	0	0	0	0	0	0	0	0	0
Q2G1Z6	SAOUHSC_01238	Phosphatidate cytidylyltransferase	0	0	6.8253	0	0	0	0	0	0	0	0	0	7.04532	7.24797	7.12057	0	0	0
Q2G1Z5	SAOUHSC_01239	Zinc metalloprotease	0	0	0	0	0	0	0	0	0	0	0	0	6.84572	6.87274	6.45179	0	0	0
Q2G1Z4	proS	Proline--tRNA ligase	6.98989	7.3075	7.25527	0	0	0	7.54283	7.64246	7.66276	7.36736	7.3927	7.3483	8.07555	8.17898	8.11727	7.7364	7.72754	7.72428	amine metabolic process;amino acid activation;carboxylic acid metabolic process;cellular amine metabolic process;cellular amino acid metabolic process;cellular ketone metabolic process;cellular macromolecule metabolic process;cellular metabolic process;cellular nitrogen compound metabolic process;cellular process;macromolecule metabolic process;metabolic process;ncRNA metabolic process;nitrogen c…	adenyl nucleotide binding;adenyl ribonucleotide binding;aminoacyl-tRNA editing activity;aminoacyl-tRNA ligase activity;ATP binding;binding;carboxylic ester hydrolase activity;catalytic activity;hydrolase activity;hydrolase activity, acting on ester bonds;ligase activity;ligase activity, forming aminoacyl-tRNA and related compounds;ligase activity, forming carbon-oxygen bonds;nucleotide binding;pr…	cell part;cytoplasm;intracellular part	Aminoacyl-tRNA biosynthesis	+	1.6939	-1.26832	+	2.48512	-0.819066	+	3.69951	-1.31059
Q2G1Z3	SAOUHSC_00652	Iron compound ABC transporter, ATP-binding protein	7.62428	7.41996	7.48144	7.26245	7.45484	7.29003	7.35793	7.3962	7.27646	7.4133	7.48996	7.5563	7.60746	7.62941	7.69548	7.44716	7.43933	7.53529		adenyl nucleotide binding;adenyl ribonucleotide binding;ATP binding;ATPase activity;binding;catalytic activity;hydrolase activity;hydrolase activity, acting on acid anhydrides;hydrolase activity, acting on acid anhydrides, in phosphorus-containing anhydrides;nucleoside-triphosphatase activity;nucleotide binding;purine nucleotide binding;purine ribonucleoside triphosphate binding;purine ribonucleo…		ABC transporters				+	1.23562	0.474997	+	1.86145	-0.56535
Q2G1Z0	SAOUHSC_00655	DhaK domain-containing protein	0	0	0	0	0	0	6.04044	0	0	0	0	0	0	0	0	0	0	0
Q2G1Y9	SAOUHSC_01060	Uncharacterized protein	0	0	6.10796	0	0	0	6.03189	0	0	0	0	0	0	0	0	0	0	0
Q2G1Y7	SAOUHSC_01061	Uncharacterized protein	6.90741	6.9619	6.94399	0	0	0	6.91855	6.92273	6.91645	7.09342	6.93702	7.02938	7.04532	6.95182	7.08279	7.0086	7.02938	7.11727
Q2G1Y6	SAOUHSC_01058	GTP-binding protein TypA, putative	0	0	0	0	0	0	0	0	6.8255	0	0	0	0	0	0	0	0	0
Q2G1Y5	ldh2	L-lactate dehydrogenase 2	6.73719	6.98137	7	0	7.03743	6.73878	6.98856	6.97267	7	6.97543	6.90848	7.0086	6.81491	6.83442	0	6.9058	0	6.81823
Q2G1Y1	SAOUHSC_02125	Uncharacterized protein	0	0	0	0	0	0	0	0	6.75571	0	0	0	0	0	0	0	0	0
Q2G1Y0	ligA	DNA ligase	0	7.01703	7.07188	0	0	0	7.18184	7.13988	7.08991	6.87448	6.98046	7.0569	7.18752	7.26245	7.3075	0	0	0	biosynthetic process;cellular biosynthetic process;cellular macromolecule biosynthetic process;cellular macromolecule metabolic process;cellular metabolic process;cellular nitrogen compound metabolic process;cellular process;cellular response to stimulus;cellular response to stress;DNA metabolic process;DNA repair;DNA replication;macromolecule biosynthetic process;macromolecule metabolic process;…	binding;catalytic activity;cation binding;DNA binding;DNA ligase (NAD+) activity;DNA ligase activity;ion binding;ligase activity;ligase activity, forming phosphoric ester bonds;metal ion binding;nucleic acid binding		Base excision repair;DNA replication;Mismatch repair;Nucleotide excision repair				+	1.3179	-0.553415	+	3.47317	-3.23349
Q2G1X7	queE	7-carboxy-7-deazaguanine synthase	0	0	0	0	0	0	0	0	0	0	0	0	0	5.91062	0	0	0	0
Q2G1X6	queC	7-cyano-7-deazaguanine synthase	8.35411	8.33244	8.27184	8.61278	8.65992	8.72263	8.69197	8.60097	8.61595	8.81425	8.86034	8.81491	8.4216	8.37107	8.37475	8.66464	8.63849	8.69723	7-methylguanosine biosynthetic process;7-methylguanosine metabolic process;biosynthetic process;cellular biosynthetic process;cellular macromolecule metabolic process;cellular metabolic process;cellular nitrogen compound biosynthetic process;cellular nitrogen compound metabolic process;cellular process;guanosine biosynthetic process;guanosine metabolic process;heterocycle biosynthetic process;het…	adenyl nucleotide binding;adenyl ribonucleotide binding;ATP binding;binding;catalytic activity;cation binding;ion binding;ligase activity;ligase activity, forming carbon-nitrogen bonds;metal ion binding;nucleotide binding;purine nucleotide binding;purine ribonucleoside triphosphate binding;purine ribonucleotide binding;ribonucleotide binding;transition metal ion binding;zinc ion binding			+	2.99644	1.14822	+	2.42193	0.642915	+	3.53041	0.922322
Q2G1X5	SAOUHSC_00720	6-carboxy-5,6,7,8-tetrahydropterin synthase	7.29226	7.50243	7.83506	0	7.10456	0	7.95761	8.02531	8.11727	7.41497	7.53908	7.22531	8.51587	8.61384	8.55509	8.0607	8.09342	7.99432	7-methylguanosine biosynthetic process;7-methylguanosine metabolic process;biosynthetic process;cellular biosynthetic process;cellular macromolecule metabolic process;cellular metabolic process;cellular nitrogen compound biosynthetic process;cellular nitrogen compound metabolic process;cellular process;guanosine biosynthetic process;guanosine metabolic process;heterocycle biosynthetic process;het…	binding;catalytic activity;cation binding;ion binding;lyase activity;metal ion binding		Folate biosynthesis	+	1.50354	-2.86794	+	2.47841	-2.12695	+	3.63706	-1.70124
Q2G1X1	SAOUHSC_01120	Uncharacterized protein	7.65031	7.6721	7.61278	7.67025	7.54033	7.72099	7.47712	7.47276	7.60746	7.47422	7.40483	7.47712	7.65321	7.81624	7.56585	7.63144	7.60314	7.61909
Q2G1X0	hly	Alpha-hemolysin	0	0	0	0	0	0	6.76042	6.86332	0	0	0	0	0	0	0	0	0	0
Q2G1W8	SAOUHSC_02191	Phage major capsid protein, HK97 family	7.17026	7.13354	7.17898	0	0	0	7.24304	7.16435	7.14922	0	0	0	7.13672	7.15229	7.19866	7.08991	7.05308	7.10037					+	1.27572	-1.19767	+	1.6703	-1.61055	+	1.59089	-0.270529
Q2G1W5	SAOUHSC_01908	NERD domain-containing protein	8.10721	8.20951	8.18469	8.21219	8.23553	8.233	8.30963	8.34242	8.26717	8.25285	8.25768	8.26007	8.57749	8.65031	8.56703	8.29885	8.23553	8.23045											+	3.25645	-1.14052
Q2G1W4	metK	S-adenosylmethionine synthase	0	0	0	0	0	0	0	0	0	0	0	0	0	5.99782	0	0	0	0
Q2G1W2	pckA	Phosphoenolpyruvate carboxykinase (ATP)	7.37291	7.32838	7.41664	0	0	0	7.46687	7.27875	7.32634	0	0	0	6.81954	6.76492	6.90363	7.05308	7.07918	7.11727	alcohol biosynthetic process;alcohol metabolic process;biosynthetic process;carbohydrate biosynthetic process;carbohydrate metabolic process;cellular biosynthetic process;cellular carbohydrate biosynthetic process;cellular carbohydrate metabolic process;cellular metabolic process;cellular process;gluconeogenesis;glucose metabolic process;hexose biosynthetic process;hexose metabolic process;metabo…	adenyl nucleotide binding;adenyl ribonucleotide binding;ATP binding;binding;carbon-carbon lyase activity;carboxy-lyase activity;catalytic activity;cation binding;ion binding;lyase activity;metal ion binding;nucleotide binding;phosphoenolpyruvate carboxykinase (ATP) activity;phosphoenolpyruvate carboxykinase activity;purine nucleotide binding;purine ribonucleoside triphosphate binding;purine ribon…	cell part;cytoplasm;intracellular part	Carbon fixation in photosynthetic organisms;Citrate cycle (TCA cycle);Glycolysis / Gluconeogenesis;Pyruvate metabolism	+	4.61581	-2.45173	+	4.18499	-3.29616	+	2.33274	0.84314
Q2G1W1	SAOUHSC_02576	Secretory antigen SsaA, putative	0	0	5.82918	0	0	0	0	0	0	0	0	0	0	0	0	0	0	0
Q2G1W0	SAOUHSC_02574	6-phosphogluconate dehydrogenase, decarboxylating	0	0	6.23431	0	0	0	0	0	0	0	0	0	0	0	0	0	0	0
Q2G1V8	SAOUHSC_02575	Uncharacterized protein	7.35603	7.44404	7.48855	0	7.24007	0	7.60423	7.66745	7.57749	7.57905	0	7.58883	7.51188	7.4014	7.38917	7.7679	7.7007	7.76864					+	1.34663	-1.8939				+	2.63932	1.0351
Q2G1V6	SAOUHSC_00334	Uncharacterized protein	6.73878	6.77379	6.77232	0	0	0	6.67117	6.6561	6.74819	6.77012	6.78032	6.74586	6.67486	6.78958	6.64933	6.64836	6.75435	0								+	1.1427	0.244526
Q2G1V4	SAOUHSC_00333	ABC transporter, ATP-binding protein, putative	6.74194	6.80346	6.8202	0	0	0	0	0	0	0	0	0	0	0	0	0	0	0
Q2G1V0	SAOUHSC_02687	Formate/nitrite transporter, putative	6.96614	6.93802	6.9345	0	0	0	7.0569	7.05308	6.9284	7.07188	6.94939	6.9952	7.23553	7.39093	7.2014	6.90633	0	0		transporter activity	cell part;membrane								+	1.49632	-3.03036
Q2G1U9	SAOUHSC_02689	Uncharacterized protein	0	6.56858	0	0	0	0	0	0	0	0	0	0	0	0	0	0	0	0
Q2G1U8	SAOUHSC_02690	ZinT domain-containing protein	7.48855	7.84819	7.58995	7.89376	8.00432	7.99739	7.76938	7.76492	7.75891	7.75358	7.77597	7.75051	7.81224	7.69636	7.80209	7.97772	8.02531	7.98137	biological adhesion;cation transport;cell adhesion;cellular process;establishment of localization;ion transport;metal ion transport;transport	binding;cation binding;ion binding;metal ion binding;transition metal ion binding;zinc ion binding		ABC transporters	+	1.33836	1.07274				+	2.30241	0.746
Q2G1U6	spx	Global transcriptional regulator Spx	7.4843	7.42975	7.46389	7.47712	7.42651	0	7.53782	7.56703	7.4624	7.57171	7.57403	7.5611	7.13672	7.24055	7.3032	7.60097	7.61805	7.62428	biological regulation;biosynthetic process;cellular biosynthetic process;cellular macromolecule biosynthetic process;cellular macromolecule metabolic process;cellular metabolic process;cellular nitrogen compound metabolic process;cellular process;macromolecule biosynthetic process;macromolecule metabolic process;metabolic process;negative regulation of biological process;negative regulation of bi…		cell part;cytoplasm;intracellular part								+	2.85813	1.28762
Q2G1U5	mecA	Adapter protein MecA	6.3483	6.35793	6.47712	0	0	0	6.39794	6.3784	6.26951	0	6.36023	6.32222	0	6.21484	0	0	0	6.27646
Q2G1U3	SAOUHSC_00937	Oligoendopeptidase F	7.80346	7.68124	7.75511	7.42975	7.32428	7.52244	7.69723	7.72099	7.72916	7.716	7.76641	7.77597	7.76641	7.87564	7.87274	7.69984	7.6637	7.70672		catalytic activity;endopeptidase activity;hydrolase activity;metalloendopeptidase activity;metallopeptidase activity;peptidase activity;peptidase activity, acting on L-amino acid peptides			+	2.05222	-1.06671				+	1.74329	-0.492238
Q2G1U2	SAOUHSC_01174	3-dmu-9_3-mt domain-containing protein	6.88081	6.99255	6.96942	0	0	0	7.10037	6.93902	7.13033	0	6.85178	6.74272	7.08279	7.12057	7.28556	6.78032	6.74351	6.88309								+	1.78637	-0.924531	+	2.06652	-1.1981
Q2G1U1	rqcH	Rqc2 homolog RqcH	7.74272	7.76118	7.65992	7.98	8.08636	7.85794	8.14301	8.12385	8.0899	8.09691	8.10037	8.06819	8.5682	8.41497	8.34635	8.82217	8.76118	8.78176					+	1.59361	0.842089				+	2.14928	1.1467
Q2G1U0	gmk	Guanylate kinase	0	0	0	0	0	0	0	0	0	0	0	0	6.67852	6.78817	6.61909	6.62118	0	6.55509
Q2G1T9	rpoZ	DNA-directed RNA polymerase subunit omega	7.02938	6.95569	6.97543	0	0	0	6.89982	6.82413	6.78247	0	0	0	0	0	0	0	0	0	biosynthetic process;cellular biosynthetic process;cellular macromolecule biosynthetic process;cellular macromolecule metabolic process;cellular metabolic process;cellular nitrogen compound metabolic process;cellular process;macromolecule biosynthetic process;macromolecule metabolic process;metabolic process;nitrogen compound metabolic process;nucleic acid metabolic process;nucleobase-containing …	binding;catalytic activity;DNA binding;DNA-directed RNA polymerase activity;nucleic acid binding;nucleotidyltransferase activity;RNA polymerase activity;transferase activity;transferase activity, transferring phosphorus-containing groups		Purine metabolism;Pyrimidine metabolism;RNA polymerase	+	2.05222	-1.53253	+	1.21173	-1.14402
Q2G1T6	gtaB	UTP--glucose-1-phosphate uridylyltransferase	0	0	0	0	0	0	0	0	5.98731	0	0	0	0	0	0	0	0	0
Q2G1T4	SAOUHSC_00830	N-acetyltransferase domain-containing protein	8.64542	8.66932	8.85248	7.49554	7.60531	7.51851	8.43775	8.549	8.37291	7.41497	7.51188	7.58659	8.0607	8.20951	8.04139	7.67486	7.59218	7.82543		acetyltransferase activity;catalytic activity;N-acetyltransferase activity;N-acyltransferase activity;transferase activity;transferase activity, transferring acyl groups;transferase activity, transferring acyl groups other than amino-acyl groups			+	4.06042	-3.92857	+	3.72955	-3.15165	+	2.03041	-1.34997
Q2G1T3	SAOUHSC_00831	Organic hydroperoxide resistance protein-like	9.00432	8.84136	8.90255	8.3032	8.30535	8.34044	8.59218	8.63548	8.57519	8.11059	8.13354	8.11059	8.37107	8.44716	8.43933	8.1038	8.02938	8.0899	response to chemical stimulus;response to oxidative stress;response to stimulus;response to stress				+	3.59076	-1.99231	+	4.80009	-1.60353	+	3.31129	-1.14547
Q2G1T2	SAOUHSC_00826	Uncharacterized protein	8.92737	8.87274	8.89982	8.63347	8.66839	8.80618	8.85126	8.86392	8.78958	8.57749	8.60206	8.49276	8.64147	8.59329	8.5832	8.29003	8.26951	8.34439					+	1.63713	-0.655411	+	2.63268	-0.921773	+	3.35228	-1.0121
Q2G1T1	SAOUHSC_00827	Uncharacterized protein	9.09342	8.88874	8.90526	7.95376	7.89708	7.92117	8.6561	8.71181	8.73719	7.88366	7.87622	7.87332	8.40483	8.37107	8.46538	8.22531	8.17319	8.26482					+	3.97801	-3.44973	+	5.35655	-2.73716	+	2.13558	-0.639993
Q2G1S8	ssl4	Staphylococcal superantigen-like 4	8.71684	8.45025	8.50243	8.64147	8.5966	8.58433	8.32222	8.25042	8.27416	8.7679	8.82151	8.78746	8.20951	8.24551	8.08279	8.72346	8.56229	8.72673	multi-organism process;pathogenesis		extracellular region					+	4.38039	1.69426	+	2.58827	1.63291
Q2G1S6	ssl5	Staphylococcal superantigen-like 5	9.27875	9.17609	9.17319	9.30103	9.37658	9.26482	9.34242	9.24304	9.27184	9.38382	9.43297	9.40483	9.14613	9.13672	9.16732	9.25042	9.18752	9.26007	multi-organism process;pathogenesis		extracellular region					+	1.68309	0.403411	+	1.5541	0.274443
Q2G1S4	SAOUHSC_00018	Replicative DNA helicase	8.29447	8.13033	8.24797	0	0	7.12749	8.20951	8.18184	8.20683	7.36736	7.40312	7.3962	8.13033	8.22011	7.99476	7.69285	7.72346	7.83632	biosynthetic process;cellular biosynthetic process;cellular macromolecule biosynthetic process;cellular macromolecule metabolic process;cellular metabolic process;cellular nitrogen compound metabolic process;cellular process;DNA metabolic process;DNA replication;macromolecule biosynthetic process;macromolecule metabolic process;metabolic process;nitrogen compound metabolic process;nucleic acid me…	adenyl nucleotide binding;adenyl ribonucleotide binding;ATP binding;binding;catalytic activity;DNA binding;DNA helicase activity;helicase activity;hydrolase activity;hydrolase activity, acting on acid anhydrides;hydrolase activity, acting on acid anhydrides, in phosphorus-containing anhydrides;nucleic acid binding;nucleoside-triphosphatase activity;nucleotide binding;purine nucleotide binding;pur…		Cell cycle - Caulobacter;DNA replication	+	2.99406	-4.68015	+	6.26636	-2.69243	+	2.00767	-1.20982
Q2G1S3	purA	Adenylosuccinate synthetase	9.02531	8.85854	8.95037	9.02119	8.96708	8.549	8.51322	8.49554	8.59218	8.79309	8.79099	8.80482	8.33244	8.35793	8.32015	8.55751	8.50786	8.52244	AMP biosynthetic process;AMP metabolic process;biosynthetic process;cellular biosynthetic process;cellular metabolic process;cellular nitrogen compound biosynthetic process;cellular nitrogen compound metabolic process;cellular process;'de novo' AMP biosynthetic process;heterocycle biosynthetic process;heterocycle metabolic process;metabolic process;nitrogen compound metabolic process;nucleobase-c…	adenylosuccinate synthase activity;binding;catalytic activity;cation binding;GTP binding;guanyl nucleotide binding;guanyl ribonucleotide binding;ion binding;ligase activity;ligase activity, forming carbon-nitrogen bonds;magnesium ion binding;metal ion binding;nucleotide binding;purine nucleotide binding;purine ribonucleoside triphosphate binding;purine ribonucleotide binding;ribonucleotide binding	cell part;cytoplasm;intracellular part	Alanine, aspartate and glutamate metabolism;Purine metabolism				+	3.02684	0.872518	+	3.31982	0.639236
Q2G1S2	SAOUHSC_00462	Uncharacterized protein	9.0086	8.63347	8.83442	8.39093	8.39967	8.5611	8.89927	8.93044	8.83632	8.23045	8.36173	8.25527	8.58883	8.56937	8.73078	8.34044	8.39794	8.35793		catalytic activity;deoxyribonuclease activity;endodeoxyribonuclease activity;endodeoxyribonuclease activity, producing 5'-phosphomonoesters;endonuclease activity;endonuclease activity, active with either ribo- or deoxyribonucleic acids and producing 5'-phosphomonoesters;hydrolase activity;hydrolase activity, acting on ester bonds;nuclease activity			+	1.43306	-1.24548	+	3.615	-2.01374	+	2.10254	-0.87773
Q2G1R9	metG	Methionine--tRNA ligase	8.83315	8.71096	8.78176	8.63849	8.62221	8.77452	8.82995	8.8451	8.73159	8.59988	8.65801	8.58883	8.59106	8.46389	8.54654	8.31597	8.33846	8.33646	amine metabolic process;amino acid activation;carboxylic acid metabolic process;cellular amine metabolic process;cellular amino acid metabolic process;cellular ketone metabolic process;cellular macromolecule metabolic process;cellular metabolic process;cellular nitrogen compound metabolic process;cellular process;macromolecule metabolic process;metabolic process;methionyl-tRNA aminoacylation;ncRN…	adenyl nucleotide binding;adenyl ribonucleotide binding;aminoacyl-tRNA ligase activity;ATP binding;binding;catalytic activity;ligase activity;ligase activity, forming aminoacyl-tRNA and related compounds;ligase activity, forming carbon-oxygen bonds;methionine-tRNA ligase activity;nucleic acid binding;nucleotide binding;purine nucleotide binding;purine ribonucleoside triphosphate binding;purine ri…	cell part;cytoplasm;intracellular part	Aminoacyl-tRNA biosynthesis;Selenocompound metabolism				+	1.96296	-0.619991	+	2.23434	-0.676139
Q2G1R3	SAOUHSC_00039	tRNA-dihydrouridine synthase	8.64542	8.40824	8.53908	8.09691	8.04532	8.32634	8.20412	8.25042	8.25768	7.96095	8.01703	7.98272	8.02531	8.06819	7.90795	8.17026	8.17609	8.13033		binding;catalytic activity;coenzyme binding;cofactor binding;flavin adenine dinucleotide binding;oxidoreductase activity;oxidoreductase activity, acting on the CH-CH group of donors;tRNA dihydrouridine synthase activity			+	1.56325	-1.2448	+	3.36459	-0.83216	+	1.4695	0.526245
Q2G1Q4	SAOUHSC_00049	AAA_12 domain-containing protein	9.22789	9.10721	9.10721	9.1038	9.11727	9.19312	9.11059	9.05308	9.04532	9.13988	9.14922	9.18184	8.78462	8.76118	8.80482	8.89598	8.89982	8.94349								+	1.64609	0.29006	+	2.5514	0.430384
Q2G1Q3	SAOUHSC_00050	Uncharacterized protein	7.6902	7.63849	7.67394	0	0	0	7.67394	7.78319	7.60638	0	0	0	0	0	0	0	0	0					+	4.45796	-3.18353	+	3.38912	-3.49264
Q2G1Q2	plc	1-phosphatidylinositol phosphodiesterase	9.01284	8.86392	8.93702	8.8202	8.86213	8.96988	8.92428	8.8704	8.8704	8.87967	8.91645	8.89376	8.60959	8.5977	8.57519	8.70757	8.74974	8.76418	catabolic process;lipid catabolic process;lipid metabolic process;metabolic process;multi-organism process;pathogenesis;primary metabolic process	catalytic activity;hydrolase activity;hydrolase activity, acting on ester bonds;lyase activity;molecular transducer activity;phosphatidylinositol diacylglycerol-lyase activity;phosphoric diester hydrolase activity;phosphoric ester hydrolase activity;phosphorus-oxygen lyase activity;signal transducer activity	extracellular region	Inositol phosphate metabolism							+	2.75178	0.486114
Q2G1Q1	SAOUHSC_00052	Uncharacterized lipoprotein SAOUHSC_00052	8.935	8.67025	8.86094	8.73719	8.80956	8.8014	8.91275	8.91116	8.87622	8.9058	8.95424	8.87679	8.76343	8.76118	8.70842	8.85431	8.81224	8.85793			cell part;membrane;plasma membrane								+	1.85943	0.322739
Q2G1P9;Q2G1P8	SAOUHSC_00054	Uncharacterized lipoprotein SAOUHSC_00055	8.96895	8.91062	8.95713	8.734	8.67761	8.75664	8.38202	8.51054	8.36922	8.57171	8.62941	8.51851	8.06446	8.11394	8.07918	8.22531	8.18184	8.27416			cell part;membrane;plasma membrane		+	2.78466	-0.740193	+	1.29287	0.506987	+	2.01206	0.469199
Q2G1P4	SAOUHSC_00060	PhoU domain-containing protein	9.17026	9.04922	9.04139	8.77743	8.91908	9.10037	8.96332	8.93247	8.86451	9.09691	9.11394	9.18469	8.68484	8.70757	8.76641	9.02531	8.94988	8.94596		anion transmembrane transporter activity;inorganic anion transmembrane transporter activity;ion transmembrane transporter activity;phosphate ion transmembrane transporter activity;sodium-dependent phosphate transmembrane transporter activity;substrate-specific transmembrane transporter activity;substrate-specific transporter activity;transmembrane transporter activity;transporter activity	cell part;membrane					+	2.22644	0.703412	+	2.69736	0.844119
Q2G1P3	SAOUHSC_00061	Uncharacterized protein	8.549	8.56585	8.73878	8.58659	8.55388	8.68931	8.21748	8.27875	8.28556	7.9952	7.94349	8.04532	7.89873	8	8.06446	7.72509	7.85914	7.7356	carboxylic acid metabolic process;cellular ketone metabolic process;cellular lipid metabolic process;cellular metabolic process;cellular process;fatty acid metabolic process;lipid metabolic process;metabolic process;monocarboxylic acid metabolic process;organic acid metabolic process;oxoacid metabolic process;primary metabolic process;small molecule metabolic process	binding;carbon-oxygen lyase activity;catalytic activity;coenzyme binding;cofactor binding;FAD binding;flavin adenine dinucleotide binding;hydro-lyase activity;lyase activity;oleate hydratase activity						+	2.72411	-0.88339	+	1.53092	-0.712388
Q2G1N9	SAOUHSC_00067	L-lactate permease	7.99255	7.98677	8.02938	8.32428	8.41996	8.55023	7.99432	7.98227	8.06819	8.37107	8.41996	8.23045	8.24551	8.38917	8.16137	8.71684	8.63548	8.70757		carboxylic acid transmembrane transporter activity;lactate transmembrane transporter activity;monocarboxylic acid transmembrane transporter activity;organic acid transmembrane transporter activity;substrate-specific transmembrane transporter activity;substrate-specific transporter activity;transmembrane transporter activity;transporter activity	cell part;integral to membrane;integral to plasma membrane;intrinsic to membrane;intrinsic to plasma membrane;membrane part;plasma membrane part		+	2.51754	1.42373	+	2.18052	1.08151	+	2.38645	1.39947
Q2G1N7	sarS	HTH-type transcriptional regulator SarS	7.95279	7.79865	0	0	0	0	8.46389	8.29226	8.55145	0	0	0	8.42813	8.52892	8.4843	7.84261	7.85914	7.64246	biological regulation;biosynthetic process;cellular biosynthetic process;cellular macromolecule biosynthetic process;cellular macromolecule metabolic process;cellular metabolic process;cellular nitrogen compound metabolic process;cellular process;macromolecule biosynthetic process;macromolecule metabolic process;metabolic process;multi-organism process;nitrogen compound metabolic process;nucleic …	binding;DNA binding;nucleic acid binding	cell part;cytoplasm;intracellular part					+	4.39136	-6.87818	+	3.12132	-2.32218
Q2G1N4	SAOUHSC_00074	Periplasmic binding protein, putative	9.12385	8.95569	8.96	7.993	8.10037	7.68664	8.63347	8.65418	8.61805	8.17319	8.18184	8.28556	8.54407	8.52114	8.51455	8.25285	8.18184	8.29667				ABC transporters	+	2.87892	-3.60931	+	3.44437	-1.40086	+	2.91215	-0.939433
Q2G1N2	sbnB	N-((2S)-2-amino-2-carboxyethyl)-L-glutamate dehydrogenase	8.943	8.80889	8.76641	8.0569	8.10037	8.15534	8.61909	8.65418	8.52244	8.06819	8.07918	8.03743	8.40993	8.45332	8.38917	8.13033	8.14922	8.07188		ammonia-lyase activity;carbon-nitrogen lyase activity;catalytic activity;deaminase activity;lyase activity;ornithine cyclodeaminase activity		Arginine and proline metabolism	+	3.5839	-2.44238	+	3.69387	-1.78379	+	3.25296	-0.997667
Q2G1N1	sbnC	Staphyloferrin B synthase	8.80346	8.71096	8.70842	8.74896	8.73159	8.62531	8.70157	8.68034	8.69548	8.75815	8.77452	8.74974	8.57634	8.55023	8.52763	8.50379	8.44405	8.55509	biosynthetic process;cellular biosynthetic process;cellular metabolic process;cellular process;cofactor biosynthetic process;cofactor metabolic process;metabolic process;nonribosomal peptide biosynthetic process;peptide biosynthetic process;peptide metabolic process;siderophore biosynthetic process;siderophore metabolic process	cation transmembrane transporter activity;inorganic cation transmembrane transporter activity;ion transmembrane transporter activity;iron ion transmembrane transporter activity;metal ion transmembrane transporter activity;siderophore transmembrane transporter activity;siderophore transporter activity;substrate-specific transmembrane transporter activity;substrate-specific transporter activity;tra…						+	2.68115	0.227023
Q2G1M8	sbnF	2-[(L-alanin-3-ylcarbamoyl)methyl]-3-(2-aminoethylcarbamoyl)-2-hydroxypropanoate synthase	8.90687	8.7574	8.78319	8.89763	8.84942	8.55751	8.62014	8.66276	8.60423	8.88874	8.90687	8.92583	8.25285	8.33041	8.25527	8.69723	8.65992	8.71767	biosynthetic process;cellular biosynthetic process;cellular metabolic process;cellular process;cofactor biosynthetic process;cofactor metabolic process;metabolic process;nonribosomal peptide biosynthetic process;peptide biosynthetic process;peptide metabolic process;siderophore biosynthetic process;siderophore metabolic process	cation transmembrane transporter activity;inorganic cation transmembrane transporter activity;ion transmembrane transporter activity;iron ion transmembrane transporter activity;metal ion transmembrane transporter activity;siderophore transmembrane transporter activity;siderophore transporter activity;substrate-specific transmembrane transporter activity;substrate-specific transporter activity;tra…		Lysine degradation				+	3.76785	0.923852	+	3.75682	1.36894
Q2G1M1	SAOUHSC_00086	Acetoin(diacetyl) reductase	0	0	5.87321	0	0	0	0	0	0	0	0	0	0	0	0	0	0	0
Q2G1L6	SAOUHSC_00106	Uncharacterized protein	9.31597	9.20951	9.19866	9.18184	9.20951	9.16435	9.02119	9.03743	9.03743	9.12385	9.15836	9.16435	8.77159	8.7356	8.7767	8.88309	8.83822	8.89432								+	2.9802	0.388139	+	2.17119	0.367339
Q2G1K9	SAOUHSC_00113	Aldehyde-alcohol dehydrogenase	8.9248	8.80003	8.81823	8.52892	8.60206	8.60853	8.64048	8.60423	8.58771	8.48855	8.58092	8.48996	8.42488	8.40654	8.3962	8.55267	8.5563	8.63246	alcohol metabolic process;carbon utilization;metabolic process;small molecule metabolic process	acetaldehyde dehydrogenase (acetylating) activity;alcohol dehydrogenase (NAD) activity;binding;catalytic activity;cation binding;ion binding;metal ion binding;oxidoreductase activity;oxidoreductase activity, acting on CH-OH group of donors;oxidoreductase activity, acting on the aldehyde or oxo group of donors;oxidoreductase activity, acting on the aldehyde or oxo group of donors, NAD or NADP as a…		Benzoate degradation;Butanoate metabolism;Chloroalkane and chloroalkene degradation;Dioxin degradation;Fatty acid metabolism;Glycolysis / Gluconeogenesis;Naphthalene degradation;Pyruvate metabolism;Tyrosine metabolism;Xylene degradation	+	2.34489	-0.889778	+	1.24544	-0.302278	+	2.48033	0.568943
Q2G1K8	SAOUHSC_00114	Capsular polysaccharide biosynthesis protein, putative	8.27875	8.4216	8.41996	8.35411	8.34242	8.34044	8.34635	8.40654	8.40654	8.24304	8.13988	8.2014	8.54531	8.65897	8.63548	8.32634	8.26951	8.31175	biosynthetic process;carbohydrate biosynthetic process;carbohydrate metabolic process;carbohydrate transport;cellular biosynthetic process;cellular carbohydrate biosynthetic process;cellular carbohydrate metabolic process;cellular lipid metabolic process;cellular macromolecule biosynthetic process;cellular macromolecule metabolic process;cellular metabolic process;cellular polysaccharide biosynth…	active transmembrane transporter activity;carbohydrate transmembrane transporter activity;cation transmembrane transporter activity;cation:sugar symporter activity;ion transmembrane transporter activity;secondary active transmembrane transporter activity;solute:cation symporter activity;solute:hydrogen symporter activity;substrate-specific transmembrane transporter activity;substrate-specific tra…	cell part;integral to membrane;intrinsic to membrane;membrane part					+	2.22039	-0.636835	+	2.88814	-1.03218
Q2G1K6	SAOUHSC_00116	Tyrosine-protein phosphatase	8.57054	8.61595	8.55871	8.617	8.57978	8.49969	8.3032	8.37291	8.3784	7.87795	7.83569	7.87795	7.97909	8.20412	8.13988	7.63849	7.67669	7.73159		binding;catalytic activity;cation binding;hydrolase activity;hydrolase activity, acting on ester bonds;ion binding;manganese ion binding;metal ion binding;phosphatase activity;phosphoprotein phosphatase activity;phosphoric ester hydrolase activity;protein tyrosine phosphatase activity;transition metal ion binding						+	4.1948	-1.61991	+	2.38279	-1.41328
Q2G1J2	isdI	Heme oxygenase (staphylobilin-producing) 2	0	0	0	0	0	0	0	0	0	0	0	7.32015	0	0	0	0	0	0
Q2G1J0	aldA	Putative aldehyde dehydrogenase AldA	6.87448	6.87737	6.91908	0	0	0	6.90741	6.86982	6.95617	6.89114	0	6.89763	6.94694	6.96614	7.0086	0	0	0		aldehyde dehydrogenase (NAD) activity;catalytic activity;oxidoreductase activity;oxidoreductase activity, acting on the aldehyde or oxo group of donors;oxidoreductase activity, acting on the aldehyde or oxo group of donors, NAD or NADP as acceptor		Arginine and proline metabolism;Ascorbate and aldarate metabolism;beta-Alanine metabolism;Chloroalkane and chloroalkene degradation;Fatty acid metabolism;Glycerolipid metabolism;Glycolysis / Gluconeogenesis;Histidine metabolism;Limonene and pinene degradation;Lysine degradation;Pentose and glucuronate interconversions;Propanoate metabolism;Pyruvate metabolism;Tryptophan metabolism;Valine, leucine…							+	1.70276	-2.32125
Q2G1I9	SAOUHSC_00133	Uncharacterized protein	6.86273	6.83059	6.80754	0	0	0	7.05308	6.935	6.8739	0	6.85626	6.83759	7.11394	7.24797	7.04532	6.84011	6.75664	6.76118		cation transmembrane transporter activity;ion transmembrane transporter activity;substrate-specific transmembrane transporter activity;substrate-specific transporter activity;transmembrane transporter activity;transporter activity	cell part;integral to membrane;intrinsic to membrane;membrane part								+	2.23	-1.16192
Q2G1I8	SAOUHSC_00134	Uncharacterized protein	8.04532	8.0086	8.02938	7.76864	7.88423	7.90902	8.20951	8.27875	8.42325	8.09691	8.13354	8.13988	8.67578	8.75282	8.78104	8.42813	8.38917	8.3962					+	1.75658	-0.577372	+	1.31259	-0.599262	+	3.22717	-1.10303
Q2G1I7	SAOUHSC_00135	Uncharacterized protein	0	0	0	0	0	0	6.94448	6.82672	7.11727	6.97681	7.02119	7.02119	7.42813	7.57403	7.16732	7.33646	7.34439	7.42813
Q2G1I2	SAOUHSC_00141	DUF2294 domain-containing protein	9.42813	9.40483	9.49554	9.42813	9.38202	9.45484	9.55871	9.68034	9.7796	9.47129	9.56348	9.49693	9.76042	9.7839	9.76641	9.40993	9.52244	9.38739											+	2.83593	-1.09731
Q2G1I1	SAOUHSC_00142	Formate dehydrogenase	0	0	0	0	0	0	0	0	0	0	7.62496	7.71933	0	0	0	0	0	0
Q2G1H9	SAOUHSC_00144	Acyl-CoA synthetase	0	0	0	0	0	0	0	0	5.62969	0	0	0	0	0	0	0	0	0
Q2G1H2	SAOUHSC_00151	Branched-chain amino acid transport system carrier protein	7.29226	7.17026	7.24055	7.33445	7.549	7.69984	7.4216	7.25285	7.32428	7.54531	7.57749	7.59879	6.88593	6.9248	0	7.42325	7.41497	7.48996		active transmembrane transporter activity;amine transmembrane transporter activity;amino acid transmembrane transporter activity;branched-chain aliphatic amino acid transmembrane transporter activity;carboxylic acid transmembrane transporter activity;organic acid transmembrane transporter activity;substrate-specific transmembrane transporter activity;substrate-specific transporter activity;transm…	cell part;integral to membrane;intrinsic to membrane;membrane part					+	2.02964	0.800419	+	1.88338	2.32393
Q2G1H0	SAOUHSC_00153	Indolepyruvate decarboxylase, putative	0	0	0	0	0	0	0	0	6.09033	0	0	0	0	0	0	0	0	0
Q2G1G8	ptsG	PTS system glucose-specific EIICBA component	8.88705	9.07918	8.96095	9.13672	9.11059	9.16137	9.18469	9.24797	9.29885	9.18469	9.32838	9.19312	10.1959	10.0414	10.0374	10.0755	9.89927	9.97128	carbohydrate transport;establishment of localization;organic substance transport;phosphoenolpyruvate-dependent sugar phosphotransferase system;transport	active transmembrane transporter activity;carbohydrate transmembrane transporter activity;catalytic activity;glucose transmembrane transporter activity;hexose transmembrane transporter activity;kinase activity;monosaccharide transmembrane transporter activity;phosphotransferase activity, alcohol group as acceptor;protein-N(PI)-phosphohistidine-sugar phosphotransferase activity;substrate-specific …	cell part;integral to membrane;intrinsic to membrane;membrane;membrane part;plasma membrane	Amino sugar and nucleotide sugar metabolism;Phosphotransferase system (PTS)	+	1.30031	0.533166
Q2G1G5	SAOUHSC_00158	PTS system EIIBC component SAOUHSC_00158	0	0	0	0	0	0	0	0	0	0	5.7773	0	0	0	0	0	0	0
Q2G1F2	azoR	FMN-dependent NADH:quinone oxidoreductase	8.24797	8.13354	8.1959	7.77743	7.5977	7.32222	8.15534	8.13033	8.02119	8.05308	8.04922	8.01703	8.20412	8.26007	8.19033	8.00432	8.01284	7.93651		binding;catalytic activity;coenzyme binding;cofactor binding;electron carrier activity;FMN binding;FMN reductase activity;nucleotide binding;oxidoreductase activity;oxidoreductase activity, acting on NADH or NADPH;oxidoreductase activity, acting on NADH or NADPH, NAD or NADP as acceptor;oxidoreductase activity, acting on other nitrogenous compounds as donors;oxidoreductase activity, acting on the…			+	1.99639	-2.08182				+	2.7168	-0.776058
Q2G1E4	SAOUHSC_00181	AP_endonuc_2 domain-containing protein	6.08279	6.10721	6.17609	0	0	0	0	6.25563	0	0	0	0	0	0	0	0	0	0
Q2G1E3	SAOUHSC_00182	Uncharacterized protein	7.29003	7.32015	7.28556	0	7.35793	7.27875	7.3784	7.36361	7.38561	7.40993	7.46835	7.52504	7.46687	7.44716	7.45332	7.48855	7.46835	7.4216		carboxyl-O-methyltransferase activity;catalytic activity;methyltransferase activity;O-methyltransferase activity;protein carboxyl O-methyltransferase activity;protein C-terminal carboxyl O-methyltransferase activity;protein C-terminal S-isoprenylcysteine carboxyl O-methyltransferase activity;protein methyltransferase activity;S-adenosylmethionine-dependent methyltransferase activity;transferase a…	cell part;integral to membrane;intrinsic to membrane;membrane part					+	1.27338	0.305295
Q2G1E1	hptR	Transcriptional regulatory protein HptR	0	0	0	0	0	0	0	0	0	0	0	0	7.43297	7.36736	6.95037	0	0	0
Q2G1D8	pflB	Formate acetyltransferase	6.7767	6.78817	6.7356	0	0	0	6.74351	0	6.78888	0	0	0	6.78319	6.94151	6.83569	0	0	6.77159
Q2G1D7	pflA	Pyruvate formate-lyase-activating enzyme	7.50786	7.59439	7.5977	7.48094	0	0	7.63448	7.61805	7.63448	7.53403	7.54033	7.48855	7.62737	7.63649	7.72428	7.85794	7.8651	7.92117	alcohol metabolic process;carbohydrate metabolic process;cellular carbohydrate metabolic process;cellular metabolic process;cellular process;glucose metabolic process;hexose metabolic process;metabolic process;monosaccharide metabolic process;primary metabolic process;small molecule metabolic process	[formate-C-acetyltransferase]-activating enzyme activity;4 iron, 4 sulfur cluster binding;binding;catalysis of free radical formation;catalytic activity;cation binding;ion binding;iron-sulfur cluster binding;metal cluster binding;metal ion binding;oxidoreductase activity;radical SAM enzyme activity	cell part;cytoplasm;intracellular part					+	2.48347	-0.358876	+	2.39571	0.726479
Q2G1D3	SAOUHSC_00192	Coagulase	6.84136	6.88986	7.3927	7.60638	7.07918	7.52504	8.42651	8.49693	8.40993	8.16137	8.33041	7.89597	8.62634	8.66087	8.55751	9.3927	9.24304	9.31806								+	1.14716	-1.04709	+	3.73488	2.33541
Q2G1D0	SAOUHSC_00195	Acetoacetyl-CoA thiolase	7.6149	7.57978	7.63849	0	0	0	7.45788	7.54531	7.62428	7.60314	7.61909	7.63246	7.73239	7.83506	7.734	7.8169	7.75587	7.74974		catalytic activity;transferase activity;transferase activity, transferring acyl groups;transferase activity, transferring acyl groups other than amino-acyl groups		alpha-Linolenic acid metabolism;Benzoate degradation;Ethylbenzene degradation;Fatty acid metabolism;Geraniol degradation;Valine, leucine and isoleucine degradation	+	4.5467	-3.30597
Q2G1C9	SAOUHSC_00196	6-phosphogluconate dehydrogenase, decarboxylating	8.26717	8.49136	8.4216	8.90091	8.74663	8.65031	8.51322	8.59988	8.7332	8.617	8.60206	8.57171	8.75891	8.67669	8.67761	8.62428	8.56585	8.5563	carboxylic acid metabolic process;cellular ketone metabolic process;cellular lipid metabolic process;cellular metabolic process;cellular process;fatty acid metabolic process;lipid metabolic process;metabolic process;monocarboxylic acid metabolic process;organic acid metabolic process;oxoacid metabolic process;primary metabolic process;small molecule metabolic process	3-hydroxyacyl-CoA dehydrogenase activity;binding;catalytic activity;coenzyme binding;cofactor binding;oxidoreductase activity;oxidoreductase activity, acting on CH-OH group of donors;oxidoreductase activity, acting on the CH-OH group of donors, NAD or NADP as acceptor		Carbon fixation pathways in prokaryotes;Fatty acid metabolism	+	1.71143	1.23766				+	1.61865	-0.406139
Q2G1C8	SAOUHSC_00197	Uncharacterized protein	8.51983	8.53908	8.46389	8.4133	8.37107	8.30103	8.62221	8.60746	8.58883	8.51054	8.52892	8.50786	8.54531	8.58092	8.52114	8.46538	8.35984	8.44405		acyl-CoA dehydrogenase activity;binding;catalytic activity;coenzyme binding;cofactor binding;flavin adenine dinucleotide binding;oxidoreductase activity;oxidoreductase activity, acting on the CH-CH group of donors		Benzoate degradation;Fatty acid metabolism;Lysine degradation;Tryptophan metabolism	+	1.66887	-0.484336	+	2.81957	-0.300284	+	1.58152	-0.418681
Q2G1C7	SAOUHSC_00198	Acyl-CoA synthetase	7.08279	7.14922	7.11394	7.06856	0	0	6.77012	6.85552	6.89376	7.09342	7.02119	6.95376	6.89542	6.96802	6.88762	6.7796	6.84323	6.76193		catalytic activity		Adipocytokine signaling pathway;Fatty acid metabolism;Peroxisome;PPAR signaling pathway				+	1.54909	0.607885	+	1.57744	-0.405605
Q2G1C6	SAOUHSC_00199	Uncharacterized protein	0	0	0	0	0	0	0	0	0	0	0	0	0	6.9987	0	0	0	0
Q2G1C5	SAOUHSC_00200	Membrane protein, putative	7.58206	7.55145	7.65321	7.62737	7.58546	7.53275	7.85065	7.7185	7.81889	7.85065	7.89487	7.92583	7.91698	7.88536	7.84261	7.98767	8.07918	7.99078		catalytic activity;hydrolase activity;peptidase activity									+	1.69038	0.456964
Q2G1C4	tarJ	Ribulose-5-phosphate reductase 2	0	0	0	0	0	0	0	0	6.47744	0	0	0	0	0	0	0	0	0
Q2G1C2	tarK	Teichoic acid ribitol-phosphate polymerase TarK	0	0	0	0	0	0	0	0	5.78679	0	0	0	0	0	0	0	0	0
Q2G1C1	tarF	Teichoic acid glycerol-phosphate transferase	8.01703	8.03743	8.01703	8.00432	8.02938	8.15534	7.89927	8.0086	8.0607	8.08279	8.06446	8.08636	8.12385	8.22789	8.16435	8.12385	8.02938	8.06446		catalytic activity;CDP-glycerol glycerophosphotransferase activity;phosphotransferase activity, for other substituted phosphate groups;transferase activity;transferase activity, transferring phosphorus-containing groups	cell part;membrane								+	1.14233	-0.330419
Q2G1C0	tarI	Ribitol-5-phosphate cytidylyltransferase 1	7.36922	7.21748	0	7.32428	7.31806	7.26717	6.88252	6.76418	6.86213	0	6.77325	6.74507	6.68034	6.72835	6.75205	0	0	0	alcohol metabolic process;biosynthetic process;carbohydrate metabolic process;carboxylic acid metabolic process;cellular aldehyde metabolic process;cellular biosynthetic process;cellular carbohydrate metabolic process;cellular ketone metabolic process;cellular lipid metabolic process;cellular metabolic process;cellular process;glyceraldehyde-3-phosphate metabolic process;isopentenyl diphosphate b…	2-C-methyl-D-erythritol 4-phosphate cytidylyltransferase activity;catalytic activity;cytidylyltransferase activity;nucleotidyltransferase activity;transferase activity;transferase activity, transferring phosphorus-containing groups		Terpenoid backbone biosynthesis							+	1.43761	-1.09515
Q2G1B9	tarJ	Ribulose-5-phosphate reductase 1	7.4456	7.46835	7.45939	0	7.22817	0	7.51455	7.49969	7.4216	7.34044	7.35218	7.35025	7.3483	7.38021	7.35411	7.39445	7.28103	7.38382		binding;catalytic activity;cation binding;ion binding;metal ion binding;oxidoreductase activity;transition metal ion binding;zinc ion binding						+	1.96849	-0.435132
Q2G1B8	tarL	Teichoic acid ribitol-phosphate polymerase TarL	7.5302	7.46835	7.54654	0	0	0	7.58995	7.48287	7.48144	0	0	0	7.54033	7.65992	7.54283	7.12057	0	0		catalytic activity;CDP-glycerol glycerophosphotransferase activity;phosphotransferase activity, for other substituted phosphate groups;transferase activity;transferase activity, transferring phosphorus-containing groups	cell part;membrane		+	2.48247	-2.13291	+	4.28149	-3.59166	+	1.56484	-3.67036
Q2G1B7	SAOUHSC_00228	Uncharacterized protein	8.89818	8.86747	9.07918	8.27184	8.30963	8.45332	8.90037	8.97543	9.15534	7.91908	7.93852	7.96614	9.42813	9.63448	9.39093	8.12385	8.35218	8.2014					+	2.66027	-2.00427	+	3.80974	-3.55158	+	3.62018	-4.18133
Q2G1A9	SAOUHSC_00236	6-phospho-beta-glucosidase, putative	8.53782	8.38739	8.38202	8.42813	8.34044	8.51054	7.97543	7.98408	8.0569	7.83632	7.77305	7.85854	7.91169	8.01284	7.97727	7.5611	7.70757	7.68574	carbohydrate metabolic process;metabolic process;primary metabolic process	6-phospho-beta-glucosidase activity;beta-glucosidase activity;catalytic activity;glucosidase activity;hydrolase activity;hydrolase activity, acting on glycosyl bonds;hydrolase activity, hydrolyzing O-glycosyl compounds		Glycolysis / Gluconeogenesis				+	2.13345	-0.607356	+	2.35856	-1.04904
Q2G1A6	rbsK	Ribokinase	8.70927	8.5955	8.60423	8.6053	8.53908	8.46982	8.32222	8.31806	8.34242	8.22011	8.21484	8.2014	8.26482	8.33846	8.32634	8	7.98543	7.96284	alcohol metabolic process;carbohydrate metabolic process;cellular carbohydrate metabolic process;cellular metabolic process;cellular process;D-ribose metabolic process;heterocycle metabolic process;metabolic process;monosaccharide metabolic process;pentose metabolic process;primary metabolic process;small molecule metabolic process	carbohydrate kinase activity;catalytic activity;kinase activity;phosphotransferase activity, alcohol group as acceptor;ribokinase activity;transferase activity;transferase activity, transferring phosphorus-containing groups		Pentose phosphate pathway				+	3.60488	-0.383524	+	3.69006	-1.08665
Q2G193	SAOUHSC_00253	Uncharacterized protein	7.70243	7.77232	7.80618	7.62531	7.56229	7.24551	7.93247	7.97128	7.90309	7.86392	7.83123	7.8488	8.34439	8.44091	8.38739	8.04922	7.98722	8.03743								+	1.79359	-0.291098	+	3.38698	-1.21674
Q2G190	SAOUHSC_00256	Peptidase C51 domain-containing protein	8.68124	8.72346	8.64933	8.71181	8.72835	8.7679	8.36361	8.4183	8.38202	8.30103	8.27184	8.27875	8.04922	8.1038	8.11059	8.16435	8.12385	8.13988								+	2.32458	-0.345819	+	1.135	0.182121
Q2G189	esxA	Type VII secretion system extracellular protein A	6.39794	6.35603	6.54654	0	0	0	0	6.5302	6.44871	0	0	6.45637	0	0	6.44404	0	0	0					+	2.36454	1.43594
Q2G188	esaA	Type VII secretion system accessory factor EsaA	8.08636	8.13033	8.0899	7.84198	7.89653	7.91434	7.96942	7.97635	7.87332	7.78032	7.85126	7.85854	7.86153	7.86806	7.93146	0	0	0			cell part;integral to membrane;intrinsic to membrane;membrane part		+	2.9593	-0.723898	+	1.23885	-0.364275	+	3.71629	-5.66838
Q2G185	essB	Type VII secretion system protein EssB	0	6.87274	6.89154	0	6.87338	0	6.74272	6.69723	6.80003	0	6.79401	0	6.69373	6.71684	6.68485	0	6.80209	6.71265
Q2G183	SAOUHSC_00264	Uncharacterized protein	0	6.60959	6.617	0	0	0	6.53529	6.57634	0	0	6.56667	0	6.60206	6.68215	6.65992	6.53908	0	0											+	1.23723	-0.410063
Q2G178	essG	Type VII secretion system protein EsaG	8.8704	9.01703	8.8848	8.97543	8.99078	9.11727	8.5302	8.46538	8.60959	8.21219	8.24055	8.34635	8.10037	8.12057	8.29885	7.90309	7.77305	7.87622								+	2.00007	-0.892588	+	1.90818	-1.07125
Q2G172	SAOUHSC_00281	Uncharacterized protein	8.29447	8.24797	8.24551	7.96237	7.91908	8.0569	8.42325	8.41497	8.37475	8.27184	8.31387	8.34242	8.19866	8.17026	8.09342	8.3075	8.26717	8.27184		transporter activity	cell part;membrane		+	2.53435	-0.94077	+	1.69627	-0.315402	+	1.70981	0.425393
Q2G170	SAOUHSC_00284	5-nucleotidase, lipoprotein e(P4) family	0	0	0	0	0	0	0	0	0	0	6.26231	0	0	0	0	0	0	0
Q2G168	SAOUHSC_00285	Uncharacterized protein	9.42975	9.37475	9.41996	9.32428	9.32428	9.47712	8.95182	9.01284	9.07918	9	9	8.98945	8.86034	8.96142	8.8791	8.86982	8.90849	8.84198
Q2G157	nanE	Putative N-acetylmannosamine-6-phosphate 2-epimerase	7.27416	7.29885	7.35411	0	0	0	7.45025	7.39445	7.43933	7.39794	7.47422	7.3962	7.45179	7.43136	7.3962	7.4609	7.44091	7.45179	alcohol catabolic process;alcohol metabolic process;amino sugar catabolic process;amino sugar metabolic process;carbohydrate catabolic process;carbohydrate metabolic process;carboxylic acid metabolic process;catabolic process;cellular carbohydrate catabolic process;cellular carbohydrate metabolic process;cellular ketone metabolic process;cellular metabolic process;cellular process;mannosamine met…	catalytic activity;isomerase activity;N-acylglucosamine-6-phosphate 2-epimerase activity;racemase and epimerase activity;racemase and epimerase activity, acting on carbohydrates and derivatives		Amino sugar and nucleotide sugar metabolism	+	2.68323	-2.17828
Q2G155	lip2	Lipase 2	0	0	6.44023	0	6.55601	0	0	0	0	6.52114	6.57519	6.48144	0	0	0	6.38382	6.5092	6.54407	catabolic process;lipid catabolic process;lipid metabolic process;metabolic process;primary metabolic process	carboxylic ester hydrolase activity;catalytic activity;hydrolase activity;hydrolase activity, acting on ester bonds;lipase activity;triglyceride lipase activity	cell part;extracellular region;membrane	Glycerolipid metabolism	+	1.39064	0.60129
Q2G154	SAOUHSC_00301	Abhydrolase_3 domain-containing protein	8.40483	8.36922	8.38561	8.24055	8.25042	8.33846	8.40824	8.49969	8.51851	8.45332	8.49969	8.47422	8.6946	8.78462	8.73799	8.49415	8.46687	8.4624		catalytic activity;hydrolase activity			+	1.54738	-0.365667				+	3.16607	-0.878971
Q2G150	SAOUHSC_00305	Uncharacterized protein	7.66276	7.72099	7.69108	7.50243	7.62118	7.53529	7.64345	7.63749	7.60097	7.59329	7.57749	7.617	7.45484	7.41162	7.48001	7.54531	7.55871	7.58092					+	1.61867	-0.46056				+	2.12926	0.37479
Q2G147	SAOUHSC_00308	Lipoate--protein ligase	9.02119	9.02531	8.96567	9.19312	9.2014	9.01284	8.76268	8.77159	8.8537	8.98632	9.03342	8.96	8.94349	8.86923	8.84261	9.11727	9.0569	9.13033	cellular macromolecule metabolic process;cellular metabolic process;cellular process;cellular protein metabolic process;macromolecule metabolic process;macromolecule modification;metabolic process;primary metabolic process;protein lipoylation;protein metabolic process;protein modification process;protein-cofactor linkage	adenyl nucleotide binding;adenyl ribonucleotide binding;ATP binding;binding;catalytic activity;nucleotide binding;purine nucleotide binding;purine ribonucleoside triphosphate binding;purine ribonucleotide binding;ribonucleotide binding;transferase activity	cell part;cytoplasm;intracellular part	Lipoic acid metabolism				+	2.26482	0.655282	+	2.33981	0.718837
Q2G146	SAOUHSC_00309	3Beta_HSD domain-containing protein	7.16137	7.233	7.26245	0	0	0	7.07335	0	0	0	0	0	0	0	0	0	0	0
Q2G144	SAOUHSC_00311	PTS EIIB type-2 domain-containing protein	7.88705	7.92531	7.89154	7.99123	7.91698	7.88649	7.88024	7.86451	7.78746	7.74974	7.82282	7.80889	7.49831	7.53656	7.55991	7.4609	7.4014	7.49831	carbohydrate transport;establishment of localization;organic substance transport;phosphoenolpyruvate-dependent sugar phosphotransferase system;transport	active transmembrane transporter activity;carbohydrate transmembrane transporter activity;catalytic activity;phosphotransferase activity, alcohol group as acceptor;protein-N(PI)-phosphohistidine-sugar phosphotransferase activity;substrate-specific transmembrane transporter activity;substrate-specific transporter activity;transferase activity;transferase activity, transferring phosphorus-containin…		Ascorbate and aldarate metabolism;Phosphotransferase system (PTS)							+	1.0974	-0.259295
Q2G141	SAOUHSC_00314	HTH marR-type domain-containing protein	6.38739	6.63649	6.60853	6.65536	0	0	0	0	0	0	0	0	6.69984	0	6.56703	0	0	0	biosynthetic process;cellular biosynthetic process;cellular macromolecule biosynthetic process;cellular macromolecule metabolic process;cellular metabolic process;cellular nitrogen compound metabolic process;cellular process;macromolecule biosynthetic process;macromolecule metabolic process;metabolic process;nitrogen compound metabolic process;nucleic acid metabolic process;nucleobase-containing …	binding;DNA binding;nucleic acid binding;nucleic acid binding transcription factor activity;sequence-specific DNA binding transcription factor activity	cell part;intracellular								+	1.45393	-1.1587
Q2G136	SAOUHSC_00319	Bac_luciferase domain-containing protein	0	0	0	0	0	0	0	0	0	0	0	0	0	5.53275	0	0	0	0
Q2G135	SAOUHSC_00320	FMN-dependent NADPH-azoreductase	8.46389	8.3962	8.45637	8.21219	8.30103	8.20412	8.4456	8.4216	8.32015	8.39794	8.42813	8.43616	8.39445	8.4133	8.36736	8.30963	8.34044	8.35603		catalytic activity;oxidoreductase activity		Riboflavin metabolism	+	2.21401	-0.663413				+	1.37894	-0.187143
Q2G131	SAOUHSC_00325	Efem/EfeO family lipoprotein	8.2833	8.38382	8.37291	8.41996	8.23553	8.27646	8.50379	8.52375	8.55388	8.59106	8.56467	8.58433	8.46538	8.60314	8.50786	8.55991	8.54407	8.58546			cell part;membrane;plasma membrane					+	1.47888	0.175665
Q2G124	SAOUHSC_00336	Probable acetyl-CoA acyltransferase	8.01284	8.02531	8.03743	8.02938	7.98498	8.18469	8	7.91009	7.95952	7.95856	8.02531	8.04922	7.85248	7.85187	7.75435	8.13988	8.20951	8.16732		acetyl-CoA C-acetyltransferase activity;acetyl-CoA C-acyltransferase activity;acetyltransferase activity;C-acetyltransferase activity;C-acyltransferase activity;catalytic activity;transferase activity;transferase activity, transferring acyl groups;transferase activity, transferring acyl groups other than amino-acyl groups	cell part;cytoplasm;intracellular part	Benzoate degradation;Butanoate metabolism;Carbon fixation pathways in prokaryotes;Fatty acid metabolism;Glyoxylate and dicarboxylate metabolism;Lysine degradation;Propanoate metabolism;Pyruvate metabolism;Synthesis and degradation of ketone bodies;Terpenoid backbone biosynthesis;Tryptophan metabolism;Two-component system;Valine, leucine and isoleucine degradation							+	3.10816	1.17155
Q2G123	SAOUHSC_00337	Uncharacterized protein	9.03342	9	8.96895	8.83378	8.86392	8.77379	9.04922	9.01284	9.01703	8.93146	8.92428	8.93702	8.92376	8.8488	8.90037	8.89763	8.90849	8.90687	amine catabolic process;amine metabolic process;aromatic amino acid family catabolic process;aromatic amino acid family metabolic process;aromatic compound catabolic process;carboxylic acid catabolic process;carboxylic acid metabolic process;catabolic process;cellular amine metabolic process;cellular amino acid catabolic process;cellular amino acid metabolic process;cellular aromatic compound met…	arylformamidase activity;catalytic activity;hydrolase activity;hydrolase activity, acting on carbon-nitrogen (but not peptide) bonds;hydrolase activity, acting on carbon-nitrogen (but not peptide) bonds, in linear amides			+	2.26359	-0.587855	+	2.85916	-0.317061
Q2G122	metE	5-methyltetrahydropteroyltriglutamate--homocysteine methyltransferase	8.42651	8.3784	8.37475	8.33846	8.27875	8.36173	8.37658	8.39445	8.40483	8.26007	8.28556	8.30535	8.32015	8.26007	8.37291	8.15534	8.15534	8.15229	amine biosynthetic process;amine metabolic process;aspartate family amino acid biosynthetic process;aspartate family amino acid metabolic process;biosynthetic process;carboxylic acid biosynthetic process;carboxylic acid metabolic process;cellular amine metabolic process;cellular amino acid biosynthetic process;cellular amino acid metabolic process;cellular biosynthetic process;cellular ketone met…	5-methyltetrahydropteroyltriglutamate-homocysteine S-methyltransferase activity;5-methyltetrahydropteroyltri-L-glutamate-dependent methyltransferase activity;binding;catalytic activity;cation binding;ion binding;metal ion binding;methyltransferase activity;S-methyltransferase activity;transferase activity;transferase activity, transferring one-carbon groups;transition metal ion binding;zinc ion b…		Cysteine and methionine metabolism;Selenocompound metabolism				+	2.65738	-0.359745	+	2.12856	-0.542768
Q2G118	SAOUHSC_00342	Chromosome partioning protein, ParB family, putative	9.10721	9.21219	9.1959	9.01703	9.06446	9.0607	9.15534	9.12385	9.15229	9.07918	9.08636	9.0607	9.1271	9.07188	9.1038	9.02938	9.02938	9.03743		binding;DNA binding;nucleic acid binding			+	1.58618	-0.413146	+	2.25236	-0.227261	+	1.87849	-0.228765
Q2G117	SAOUHSC_00344	Uncharacterized protein	7.32838	6.98363	0	0	7.04922	7.24551	7.24304	7.11727	7.233	7.13033	7.12057	7.12057	7.233	7.22011	7.18184	7.13988	7.08991	7.15229	cellular process;establishment of localization;transmembrane transport;transport		cell part;membrane								+	1.58126	-0.280011
Q2G116	SAOUHSC_00345	Uncharacterized protein	8.05308	7.91169	7.98543	7.83506	7.98408	7.77597	8.00432	7.96848	8.01284	8.04139	8.07188	8.1038	7.99695	7.95231	8.02938	8.01703	8.06446	8.1271								+	1.57151	0.256272
Q2G115	ychF	Ribosome-binding ATPase YchF	7.78247	7.81023	7.7796	0	0	0	7.94498	7.96755	7.96614	0	0	0	7.35218	7.52114	7.35411	7.45939	7.4456	7.55509		adenyl nucleotide binding;adenyl ribonucleotide binding;ATP binding;ATPase activity;binding;catalytic activity;GTP binding;guanyl nucleotide binding;guanyl ribonucleotide binding;hydrolase activity;hydrolase activity, acting on acid anhydrides;hydrolase activity, acting on acid anhydrides, in phosphorus-containing anhydrides;nucleoside-triphosphatase activity;nucleotide binding;purine nucleotide …			+	2.53325	-3.42194	+	3.74288	-4.22675
Q2G114	SAOUHSC_00347	Uncharacterized protein	0	0	6.46495	0	0	0	0	0	0	0	0	0	0	6.41664	6.26245	0	0	0
Q2G113	rpsF	30S ribosomal protein S6	0	0	0	7.37291	7.30103	7.18469	0	0	0	7.12057	7.07555	7.11394	0	0	0	6.96237	6.97727	7.0607	biosynthetic process;cellular biosynthetic process;cellular macromolecule biosynthetic process;cellular macromolecule metabolic process;cellular metabolic process;cellular process;cellular protein metabolic process;macromolecule biosynthetic process;macromolecule metabolic process;metabolic process;primary metabolic process;protein metabolic process;translation	binding;nucleic acid binding;RNA binding;rRNA binding;structural constituent of ribosome;structural molecule activity	cell part;cytoplasmic part;intracellular non-membrane-bounded organelle;intracellular organelle;intracellular part;macromolecular complex;non-membrane-bounded organelle;organelle;ribonucleoprotein complex;ribosome	Ribosome	+	2.83909	3.05338	+	1.51698	2.46107	+	1.05446	2.56123
Q2G112	SAOUHSC_00349	Single-stranded DNA-binding protein	6.74507	6.76716	6.84819	0	0	0	6.83251	6.68215	7.04532	6.81491	6.74586	6.72673	0	7.08991	7.03342	0	0	6.69285
Q2G111	rpsR	30S ribosomal protein S18	0	0	0	0	0	0	6.89265	6.87448	6.80956	0	0	0	7.16435	7.08279	7.30963	6.75128	0	6.84757	biosynthetic process;cellular biosynthetic process;cellular macromolecule biosynthetic process;cellular macromolecule metabolic process;cellular metabolic process;cellular process;cellular protein metabolic process;macromolecule biosynthetic process;macromolecule metabolic process;metabolic process;primary metabolic process;protein metabolic process;translation	binding;nucleic acid binding;RNA binding;rRNA binding;structural constituent of ribosome;structural molecule activity	cell part;cytoplasmic part;intracellular non-membrane-bounded organelle;intracellular organelle;intracellular part;macromolecular complex;non-membrane-bounded organelle;organelle;ribonucleoprotein complex;ribosome	Ribosome				+	1.38153	-1.13437	+	1.44169	-1.81808
Q2G107	selX	Enterotoxin-like toxin X	0	0	6.67654	0	0	0	0	0	0	0	0	0	0	6.43457	0	0	0	0
Q2G105	SAOUHSC_00356	Uncharacterized protein	6.76641	6.98453	6.94841	7.04922	7.0607	7.23553	6.8704	6.91116	7.02119	6.85974	6.76641	6.77525	7.13988	7.14922	7.15534	6.83885	6.85431	6.7767								+	1.16561	-0.444422	+	3.75366	-1.07916
Q2G104	SAOUHSC_00357	HTH cro/C1-type domain-containing protein	7.47857	7.40654	7.38917	0	0	0	7.46982	7.3927	7.45939	0	0	0	7.32428	7.22011	7.25527	0	0	0		binding;DNA binding;nucleic acid binding;sequence-specific DNA binding			+	3.81303	-2.10101	+	3.13796	-3.69644	+	2.63638	-3.32263
Q2G101	SAOUHSC_00359	Phosphoglycerate mutase family protein	6.71349	6.78888	6.70927	0	0	0	6.91487	6.79934	6.76567	0	0	0	6.68215	6.72346	6.74663	0	0	0		catalytic activity		Glycolysis / Gluconeogenesis;Methane metabolism				+	2.54169	-2.23202
Q2G0Z9	SAOUHSC_00362	Uncharacterized protein	0	0	0	0	0	0	0	0	5.70196	0	0	0	0	0	0	0	0	0
Q2G0Z8	SAOUHSC_00363	Uncharacterized protein	7.32222	7.41497	7.24551	7.61909	7.68305	7.4609	7.69373	7.60853	7.60423	7.68124	7.81491	7.67578	7.3483	7.46687	7.38382	7.74896	7.69897	7.68034					+	1.46774	0.86407				+	2.79721	1.029
Q2G0Z5	nfrA	NADPH-dependent oxidoreductase	0	0	0	0	0	0	0	0	0	0	0	0	0	0	0	7.14301	7.16137	7.08636
Q2G0Z4	SAOUHSC_00367	Uncharacterized protein	0	0	0	0	0	0	0	0	0	0	0	0	0	0	0	5.07188	0	0
Q2G0Z2	SAOUHSC_00369	Uncharacterized protein	8.42488	8.40993	8.45179	8.25768	8.26951	8.27184	8.36361	8.41497	8.37291	8.27416	8.27875	8.28556	8.28103	8.31175	8.3784	8.21484	8.26951	8.27646					+	3.62716	-0.539889	+	2.53003	-0.346619
Q2G0Z1	SAOUHSC_00370	Uncharacterized protein	7.93349	7.94694	7.87099	7.92686	7.8893	7.96755	8.0607	8.0899	8.0607	7.98588	7.99826	8.02119	8.03743	7.98318	8.05308	7.902	7.8704	7.87564								+	2.07359	-0.22808	+	2.43247	-0.471307
Q2G0Z0	SAOUHSC_00371	YflT domain-containing protein	8.14922	8.16435	8.25042	7.66839	7.65801	7.5302	8.11059	8.12057	8.07918	7.74586	7.84198	7.84572	8.0086	8.0569	8.08636	7.82995	7.9425	8.0086					+	3.32395	-1.89061	+	2.94995	-0.970874
Q2G0Y9	xpt	Xanthine phosphoribosyltransferase	0	0	0	0	0	0	6.63144	6.76938	6.91222	0	0	0	7.13354	7.27184	7.24551	6.95424	7.02531	6.8704	biosynthetic process;cellular aromatic compound metabolic process;cellular biosynthetic process;cellular metabolic compound salvage;cellular metabolic process;cellular nitrogen compound biosynthetic process;cellular nitrogen compound metabolic process;cellular process;heterocycle biosynthetic process;heterocycle metabolic process;metabolic process;nitrogen compound metabolic process;nucleobase me…	catalytic activity;transferase activity;transferase activity, transferring glycosyl groups;transferase activity, transferring pentosyl groups;xanthine phosphoribosyltransferase activity	cell part;cytoplasm;intracellular part	Purine metabolism				+	1.53696	-1.86717	+	1.90833	-0.886889
Q2G0Y7	guaB	Inosine-5-monophosphate dehydrogenase	0	0	0	0	0	0	6.14922	6.21219	6.28103	0	0	0	6.56348	6.69984	6.74896	0	0	0	biosynthetic process;cellular biosynthetic process;cellular metabolic process;cellular nitrogen compound biosynthetic process;cellular nitrogen compound metabolic process;cellular process;GMP biosynthetic process;GMP metabolic process;heterocycle biosynthetic process;heterocycle metabolic process;metabolic process;nitrogen compound metabolic process;nucleobase-containing compound biosynthetic pro…	binding;catalytic activity;cation binding;IMP dehydrogenase activity;ion binding;metal ion binding;nucleotide binding;oxidoreductase activity;oxidoreductase activity, acting on CH-OH group of donors;oxidoreductase activity, acting on the CH-OH group of donors, NAD or NADP as acceptor		Drug metabolism - other enzymes;Purine metabolism							+	2.53596	-1.80342
Q2G0Y6	guaA	GMP synthase [glutamine-hydrolyzing]	0	0	0	0	0	0	7.07207	0	0	7.71349	7.86806	0	0	0	0	8.42975	8.4133	8.40654	amine metabolic process;biosynthetic process;carboxylic acid metabolic process;cellular amine metabolic process;cellular amino acid metabolic process;cellular biosynthetic process;cellular ketone metabolic process;cellular macromolecule metabolic process;cellular metabolic process;cellular nitrogen compound biosynthetic process;cellular nitrogen compound metabolic process;cellular process;glutami…	adenyl nucleotide binding;adenyl ribonucleotide binding;ATP binding;binding;carbon-nitrogen ligase activity, with glutamine as amido-N-donor;catalytic activity;GMP synthase (glutamine-hydrolyzing) activity;hydrolase activity;hydrolase activity, acting on acid anhydrides;hydrolase activity, acting on acid anhydrides, in phosphorus-containing anhydrides;ligase activity;ligase activity, forming carb…		Drug metabolism - other enzymes;Purine metabolism							+	3.22474	7.12526
Q2G0Y0	SAOUHSC_00382	NAD(P)-bd_dom domain-containing protein	0	6.48296	0	0	0	0	6.27875	0	6.28556	0	0	0	0	0	0	0	0	0
Q2G0X8	SAOUHSC_00384	Uncharacterized protein	0	0	0	0	0	0	7.35793	7.4609	0	0	0	0	7.11394	0	7.23805	7.40483	0	7.26245
Q2G0X3	SAOUHSC_00400	Uncharacterized protein	7.06819	7.15534	7.14922	7.15836	7.20683	7.19312	7.15836	7.0569	7.11059	7.16732	7.10037	7.18469	0	0	6.45025	7.11394	7.12385	7.11059											+	3.32843	2.27279
Q2G0X2	SAOUHSC_00401	Uncharacterized protein	0	6.75367	0	0	0	0	0	6.65128	6.65706	6.5682	6.54033	0	0	0	0	6.62014	0	6.62941					+	1.42146	1.13886
Q2G0X1;Q2G0W9	SAOUHSC_00402	Uncharacterized lipoprotein SAOUHSC_00405	7.13672	7.22011	7.24304	0	0	0	7.34242	7.30963	7.29447	7.1271	7.17898	7.15534	7.31175	7.32634	7.31387	7.15534	7.13033	7.24304			cell part;membrane;plasma membrane		+	2.0017	-1.58712	+	2.84538	-0.537157	+	1.82552	-0.468667
Q2G0X0	SAOUHSC_00404	Uncharacterized lipoprotein SAOUHSC_00404	8.16732	8.13354	8.13672	7.83251	7.89873	8.18752	8	7.9425	7.96047	8.05308	8.0569	8.1271	7.86923	7.96142	7.90091	7.78746	7.80209	7.77887			cell part;membrane;plasma membrane					+	1.71193	0.369967	+	1.91239	-0.40211
Q2G0W7	SAOUHSC_00407	Uncharacterized protein	6.82995	6.7574	6.81624	0	0	0	6.76567	6.70586	6.7007	6.7436	0	6.78247	0	0	0	0	0	0					+	1.30677	-0.64142
Q2G0W1	SAOUHSC_00413	UPF0753 protein SAOUHSC_00413	7.94547	7.99913	7.96755	8.0607	7.96942	8.0607	7.91698	7.90363	7.86213	7.82086	7.82995	7.89098	7.65031	7.62325	7.6637	7.64147	7.69285	7.67578
Q2G0W0	SAOUHSC_00414	DUF2294 domain-containing protein	0	0	0	0	0	0	0	0	0	0	0	0	6.69636	6.97313	6.54531	0	0	0
Q2G0V7	SAOUHSC_00417	Hydrolase_4 domain-containing protein	6.8014	6.76042	6.75051	0	0	0	6.7679	6.78104	6.70415	6.73719	6.64933	6.78888	6.63246	6.56585	6.70757	0	0	6.67025
Q2G0V3	SAOUHSC_00422	Trans-sulfuration enzyme family protein, putative	0	0	0	0	0	0	0	0	7.08558	0	0	0	0	0	0	0	7.01284	0
Q2G0V0	SAOUHSC_00426	Lipoprotein	6.71517	6.7839	6.78533	0	0	0	6.84634	6.86451	6.7767	0	0	0	6.59988	6.55751	6.71012	6.66181	0	0
Q2G0U9	sle1	N-acetylmuramoyl-L-alanine amidase sle1	6.63144	0	6.34439	0	0	0	6.81023	6.72835	6.6637	0	0	0	6.77597	6.86629	6.81224	6.29226	0	0	barrier septum formation;cell death;cell wall organization;cell wall organization or biogenesis;cellular component assembly;cellular component assembly at cellular level;cellular component organization;cellular component organization at cellular level;cellular component organization or biogenesis;cellular component organization or biogenesis at cellular level;cellular process;cytokinetic process;…	catalytic activity;hydrolase activity;hydrolase activity, acting on carbon-nitrogen (but not peptide) bonds;hydrolase activity, acting on carbon-nitrogen (but not peptide) bonds, in linear amides;N-acetylmuramoyl-L-alanine amidase activity	cell part;cell surface;extracellular region					+	2.48419	-1.32925	+	1.75798	-1.51104
Q2G0U8	SAOUHSC_00428	Uncharacterized protein	7.46982	7.48287	7.44716	0	7.09325	0	7.57054	7.47129	7.47276	7.42325	7.49276	7.43616	7.43457	7.39967	7.40824	7.3483	7.34242	7.32634					+	2.47381	-1.76662				+	2.42878	-0.249609
Q2G0U7	SAOUHSC_00429	MutT/nudix family protein, putative	8.07918	8.42488	8.22272	8.74741	8.73719	8.28103	8.34635	8.36736	8.41996	8.4133	8.45788	8.38382	7.84572	7.95713	7.85491	8.30963	8.4014	8.27646		catalytic activity;hydrolase activity									+	2.99347	1.47243
Q2G0U6	SAOUHSC_00430	N-acetyltransferase domain-containing protein	7.39967	7.20412	7.45788	0	0	0	7.60206	7.51455	7.56937	0	0	0	7.6721	7.6721	7.64933	6.85733	0	0		acetyltransferase activity;catalytic activity;N-acetyltransferase activity;N-acyltransferase activity;transferase activity;transferase activity, transferring acyl groups;transferase activity, transferring acyl groups other than amino-acyl groups			+	1.34838	-1.69311	+	2.70265	-3.34064	+	2.25583	-3.73026
Q2G0U4	SAOUHSC_00433	Uncharacterized protein	0	0	0	0	0	0	0	0	0	0	0	0	0	6.15229	0	0	0	0
Q2G0U2	SAOUHSC_00435	Glutamate synthase, large subunit, putative	7.21484	7.17319	7.19033	0	0	0	7.46389	7.4133	7.37291	6.88138	6.77379	7.10721	7.62941	7.67117	7.65896	7.26007	7.27646	7.20952	amine biosynthetic process;amine metabolic process;biosynthetic process;carboxylic acid biosynthetic process;carboxylic acid metabolic process;cellular amine metabolic process;cellular amino acid biosynthetic process;cellular amino acid metabolic process;cellular biosynthetic process;cellular ketone metabolic process;cellular metabolic process;cellular nitrogen compound biosynthetic process;cellu…	catalytic activity;glutamate synthase (NADPH) activity;glutamate synthase activity;glutamate synthase activity, NADH or NADPH as acceptor;oxidoreductase activity;oxidoreductase activity, acting on the CH-NH2 group of donors;oxidoreductase activity, acting on the CH-NH2 group of donors, NAD or NADP as acceptor		Alanine, aspartate and glutamate metabolism;Nitrogen metabolism	+	1.80442	-1.66208	+	2.08691	-1.64737	+	4.16357	-1.34372
Q2G0U1	SAOUHSC_00436	NADH-glutamate synthase small subunit, putative	0	0	0	0	0	0	0	0	0	0	0	0	0	6.10721	6.12057	0	0	0
Q2G0U0	SAOUHSC_00437	Uncharacterized protein	0	0	0	0	0	0	6.65706	0	6.71181	0	0	0	0	0	0	0	0	0
Q2G0T9	SAOUHSC_00438	Alpha amylase family protein, putative	8.21219	8.28103	8.22011	9.12057	9.17319	8.95037	8.5563	8.5563	8.46538	9.7679	9.87795	9.53656	9.35218	9.68484	8.47857	10.5551	10.7275	10.5944	carbohydrate catabolic process;carbohydrate metabolic process;catabolic process;cellular carbohydrate catabolic process;cellular carbohydrate metabolic process;cellular metabolic process;cellular process;disaccharide catabolic process;disaccharide metabolic process;glycoside catabolic process;glycoside metabolic process;metabolic process;oligosaccharide catabolic process;oligosaccharide metabolic…	alpha,alpha-phosphotrehalase activity;binding;catalytic activity;cation binding;hydrolase activity;hydrolase activity, acting on glycosyl bonds;hydrolase activity, hydrolyzing O-glycosyl compounds;ion binding;trehalase activity	cell part;cytoplasm;intracellular part	Starch and sucrose metabolism	+	3.54944	2.80237	+	3.47664	3.9912	+	1.79229	4.82946
Q2G0T8	SAOUHSC_00439	HTH gntR-type domain-containing protein	6.87622	7.01284	6.9284	0	6.83516	0	6.9652	7.02119	6.96848	7.0086	6.98989	7.02119	7.22789	7.24551	7.17898	6.99388	6.99255	7.0569	biosynthetic process;cellular biosynthetic process;cellular macromolecule biosynthetic process;cellular macromolecule metabolic process;cellular metabolic process;cellular nitrogen compound metabolic process;cellular process;macromolecule biosynthetic process;macromolecule metabolic process;metabolic process;nitrogen compound metabolic process;nucleic acid metabolic process;nucleobase-containing …	binding;DNA binding;nucleic acid binding;nucleic acid binding transcription factor activity;sequence-specific DNA binding transcription factor activity			+	1.39684	-0.605221				+	2.6535	-0.674397
Q2G0T6	SAOUHSC_00441	N-acetyltransferase domain-containing protein	0	0	0	0	0	0	6.89098	6.91908	0	0	0	0	6.8791	6.90146	6.67302	8.27875	8.23805	8.2014		acetyltransferase activity;catalytic activity;N-acetyltransferase activity;N-acyltransferase activity;transferase activity;transferase activity, transferring acyl groups;transferase activity, transferring acyl groups other than amino-acyl groups									+	4.31648	4.72226
Q2G0T5	dnaX	DNA polymerase III subunit gamma/tau	0	0	0	0	0	0	0	0	0	0	0	6.24055	0	0	0	0	0	0
Q2G0T4	SAOUHSC_00444	Nucleoid-associated protein SAOUHSC_00444	8.91645	9.04532	8.98046	9.29447	9.28103	9.43136	9.06446	9.16732	9.11059	8.96237	9.07188	8.97174	9.29226	9.18184	9.26245	9.29447	9.18469	9.22531		binding;DNA binding;nucleic acid binding	bacterial nucleoid;cell part;cytoplasm;intracellular non-membrane-bounded organelle;intracellular organelle;intracellular part;non-membrane-bounded organelle;nucleoid;organelle		+	2.36837	1.17887	+	1.14708	-0.37247
Q2G0T3	recR	Recombination protein RecR	8.90956	8.93044	8.89927	8.74194	8.70329	8.86451	8.66087	8.68215	8.6149	8.75205	8.79518	8.77452	8.60423	8.71517	8.68574	8.27416	8.29003	8.25285	cellular macromolecule metabolic process;cellular metabolic process;cellular nitrogen compound metabolic process;cellular process;cellular response to stimulus;cellular response to stress;DNA metabolic process;DNA recombination;DNA repair;macromolecule metabolic process;metabolic process;nitrogen compound metabolic process;nucleic acid metabolic process;nucleobase-containing compound metabolic pr…	binding;cation binding;DNA binding;ion binding;metal ion binding;nucleic acid binding		Homologous recombination	+	1.35327	-0.47562	+	2.17897	0.402885	+	3.46428	-1.31558
Q2G0T1	rnmV	Ribonuclease M5	0	0	0	0	0	0	0	0	0	0	0	0	0	5.75587	0	0	0	0
Q2G0T0	rsmA	Ribosomal RNA small subunit methyltransferase A	0	0	0	0	0	0	0	0	0	0	0	0	0	0	0	0	6.11059	0
Q2G0S9	SAOUHSC_00465	Uncharacterized protein	0	0	0	0	0	0	7.11394	7.15836	7.34242	0	0	0	7.29885	7.69197	7.48572	7.13033	0	0								+	1.51352	-2.11321	+	1.40867	-2.92464
Q2G0S8	SAOUHSC_00466	Putative 4-diphosphocytidyl-2-C-methyl-D-erythritol kinase	9.71433	9.91062	9.78533	8.97497	9.0569	8.94547	10.5315	10.5237	10.4857	9.24304	9.31806	9.16435	10.4216	10.356	10.2601	9.74273	9.68484	9.71265	alcohol metabolic process;biosynthetic process;carbohydrate metabolic process;carboxylic acid metabolic process;cellular aldehyde metabolic process;cellular biosynthetic process;cellular carbohydrate metabolic process;cellular ketone metabolic process;cellular lipid metabolic process;cellular metabolic process;cellular process;glyceraldehyde-3-phosphate metabolic process;isopentenyl diphosphate b…	4-(cytidine 5'-diphospho)-2-C-methyl-D-erythritol kinase activity;adenyl nucleotide binding;adenyl ribonucleotide binding;ATP binding;binding;catalytic activity;kinase activity;nucleotide binding;phosphotransferase activity, alcohol group as acceptor;purine nucleotide binding;purine ribonucleoside triphosphate binding;purine ribonucleotide binding;ribonucleotide binding;transferase activity;trans…		Terpenoid backbone biosynthesis	+	3.58933	-2.69402	+	4.97082	-4.22493	+	3.65513	-2.1011
Q2G0S7	SAOUHSC_00467	Pur operon repressor	9.43457	9.65801	9.52892	8.87448	8.94547	8.91222	10.2529	10.2279	10.1584	9.32634	9.41996	9.27875	10.1173	10.0682	9.9196	9.95856	9.90956	9.86273	biological regulation;cellular metabolic process;cellular nitrogen compound metabolic process;cellular process;metabolic process;negative regulation of biological process;negative regulation of biosynthetic process;negative regulation of cellular biosynthetic process;negative regulation of cellular macromolecule biosynthetic process;negative regulation of cellular metabolic process;negative regul…	binding;DNA binding;nucleic acid binding			+	3.12329	-2.09207	+	4.18952	-2.89457
Q2G0S6	SAOUHSC_00468	Uncharacterized protein	0	0	0	0	0	0	7.75891	7.75511	7.69723	0	0	0	7.74115	7.31597	0	7.71012	0	7.68931		catalytic activity;deaminase activity			+	1.95555	1.85273	+	3.72465	-5.315
Q2G0S3	glmU	Bifunctional protein GlmU	0	0	7.16065	0	0	0	0	0	0	0	0	0	0	0	0	0	0	0
Q2G0S2	prs	Ribose-phosphate pyrophosphokinase	0	0	0	0	0	0	0	0	0	0	0	0	0	0	0	0	6.13672	0
Q2G0S0	rplY	50S ribosomal protein L25	0	0	0	0	0	0	0	0	0	0	0	0	0	0	0	0	7.4014	0
Q2G0R9	pth	Peptidyl-tRNA hydrolase	0	0	0	0	0	0	0	0	0	0	0	0	0	0	0	0	6.00432	0
Q2G0R8	mfd	Transcription-repair-coupling factor	0	0	0	0	0	0	0	0	0	0	0	0	0	0	0	6.70157	0	0
Q2G0R6	SAOUHSC_00480	Uncharacterized protein	0	0	0	0	0	0	0	0	0	0	0	0	0	0	0	6.21748	6.36173	6.32015
Q2G0R5	SAOUHSC_00481	S4 RNA-binding domain-containing protein	0	0	0	0	0	0	0	0	0	0	0	0	6.96142	0	0	0	0	0
Q2G0R4	SAOUHSC_00482	Uncharacterized protein	0	0	0	0	0	0	0	0	0	0	0	0	0	0	0	0	0	6.56229
Q2G0R3	SAOUHSC_00483	S1 RNA binding domain protein	0	0	0	0	0	0	0	0	0	0	0	0	0	6.04532	0	0	0	0
Q2G0R1	SAOUHSC_00485	Hypoxanthine phosphoribosyltransferase	0	0	6.2714	8.24304	8.32222	7.75587	0	0	0	8.65031	8.74741	8.67025	0	6.51851	6.52763	8.02938	8.14922	8.22531	biosynthetic process;cellular biosynthetic process;cellular metabolic compound salvage;cellular metabolic process;cellular nitrogen compound biosynthetic process;cellular nitrogen compound metabolic process;cellular process;heterocycle biosynthetic process;heterocycle metabolic process;metabolic process;nitrogen compound metabolic process;nucleobase-containing compound biosynthetic process;nucleo…	catalytic activity;guanine phosphoribosyltransferase activity;hypoxanthine phosphoribosyltransferase activity;transferase activity;transferase activity, transferring glycosyl groups;transferase activity, transferring pentosyl groups	cell part;cytoplasm;intracellular part	Drug metabolism - other enzymes;Purine metabolism	+	2.77818	5.38527	+	4.66412	7.79835	+	3.42791	5.84412
Q2G0R0	ftsH	ATP-dependent zinc metalloprotease FtsH	8.39445	8.36922	0	8.91698	9.04139	8.82413	8.4624	7.39093	8.39794	9.18469	9.35218	9.22272	7.53782	8.28556	7.46687	9.3962	9.49276	9.02938	catabolic process;macromolecule catabolic process;macromolecule metabolic process;metabolic process;primary metabolic process;protein catabolic process;protein metabolic process	adenyl nucleotide binding;adenyl ribonucleotide binding;ATP binding;ATPase activity;binding;catalytic activity;cation binding;endopeptidase activity;hydrolase activity;hydrolase activity, acting on acid anhydrides;hydrolase activity, acting on acid anhydrides, in phosphorus-containing anhydrides;ion binding;metal ion binding;metalloendopeptidase activity;metallopeptidase activity;nucleoside-triph…	cell part;integral to membrane;intrinsic to membrane;membrane;membrane part;plasma membrane					+	1.53828	3.88479	+	2.18176	5.12474
Q2G0Q9	hslO	33 kDa chaperonin	9.40654	9.52634	9.32222	8.46982	8.61909	8.3962	10.6314	10.4669	10.601	8.85126	8.98722	8.84634	11.2765	11.1206	11.0645	9.92634	9.6946	9.68574	cellular macromolecule metabolic process;cellular metabolic process;cellular process;cellular protein metabolic process;macromolecule metabolic process;metabolic process;primary metabolic process;protein folding;protein metabolic process		cell part;cytoplasm;intracellular part		+	3.32446	-3.06723	+	4.77742	-5.55257	+	3.78345	-4.60065
Q2G0Q8	SAOUHSC_00488	Cysteine synthase	0	0	0	0	0	0	7.27184	7.16732	7.29226	0	0	0	8.34635	8.2878	7.91062	7.06819	0	6.85794	amine biosynthetic process;amine metabolic process;biosynthetic process;carboxylic acid biosynthetic process;carboxylic acid metabolic process;cellular amine metabolic process;cellular amino acid biosynthetic process;cellular amino acid metabolic process;cellular biosynthetic process;cellular ketone metabolic process;cellular metabolic process;cellular nitrogen compound biosynthetic process;cellu…	carbon-oxygen lyase activity;catalytic activity;cysteine synthase activity;lyase activity;transferase activity		Cysteine and methionine metabolism;Sulfur metabolism				+	3.07235	-3.01978	+	2.14178	-4.87516
Q2G0Q7	SAOUHSC_00489	Dihydropteroate synthase	7.95617	7.83569	7.88874	7.76343	7.68574	7.77159	7.97174	7.9284	7.93298	7.78104	7.82282	7.76864	7.94645	7.93752	7.95279	7.80346	7.74115	7.81491	amine biosynthetic process;amine metabolic process;aromatic compound biosynthetic process;biosynthetic process;carboxylic acid biosynthetic process;carboxylic acid metabolic process;cellular amine metabolic process;cellular amino acid biosynthetic process;cellular amino acid metabolic process;cellular aromatic compound metabolic process;cellular biosynthetic process;cellular ketone metabolic proc…	binding;catalytic activity;cation binding;dihydropteroate synthase activity;ion binding;metal ion binding;transferase activity;transferase activity, transferring alkyl or aryl (other than methyl) groups		Folate biosynthesis	+	1.58768	-0.509188	+	2.69991	-0.510049	+	2.61567	-0.528453
Q2G0Q5	SAOUHSC_00491	2-amino-4-hydroxy-6-hydroxymethyldihydropteridine pyrophosphokinase	0	0	0	0	0	0	0	0	5.90324	0	0	0	0	0	0	0	0	0
Q2G0Q3	lysS	Lysine--tRNA ligase	0	0	5.75066	0	0	0	0	0	0	0	0	0	0	0	0	0	0	0
Q2G0Q1	pdxS	Pyridoxal 5-phosphate synthase subunit PdxS	7.71181	7.65418	7.57403	0	0	0	7.65992	7.62428	7.6464	7.617	7.62839	7.60314	7.7679	7.78462	7.69548	7.67943	7.69984	7.62428	biosynthetic process;cellular biosynthetic process;cellular metabolic process;cellular process;coenzyme biosynthetic process;coenzyme metabolic process;cofactor biosynthetic process;cofactor metabolic process;heterocycle metabolic process;metabolic process;pyridoxal phosphate biosynthetic process;pyridoxal phosphate metabolic process;small molecule biosynthetic process;small molecule metabolic pr…			Vitamin B6 metabolism	+	1.68141	-2.37831				+	1.08019	-0.270681
Q2G0Q0	pdxT	Pyridoxal 5-phosphate synthase subunit PdxT	0	6.82543	6.95085	0	0	0	6.88196	6.65992	6.88649	6.89265	7.04922	6.93651	7.12057	7.07918	6.96755	6.88252	7.01284	0
Q2G0P9	SAOUHSC_00501	Uncharacterized protein	8.59439	8.53656	8.55991	8.32428	8.33846	8.40312	8.41497	8.46982	8.47712	8.32428	8.34044	8.33244	8.50786	8.5966	8.52375	8.24055	8.32838	8.22272		active transmembrane transporter activity;cation transmembrane transporter activity;inorganic cation transmembrane transporter activity;ion transmembrane transporter activity;metal ion transmembrane transporter activity;monovalent inorganic cation transmembrane transporter activity;nucleobase-containing compound transmembrane transporter activity;nucleoside transmembrane transporter activity;nucl…	cell part;membrane		+	2.67288	-0.692066	+	2.41905	-0.403892	+	2.55126	-0.926324
Q2G0P8	ctsR	Transcriptional regulator CtsR	7.15229	7.16435	7.22272	7.12385	7.04139	0	7.3032	7.25768	7.24797	7.11727	7.08636	7.13354	7.16732	7.08991	7.17898	7.22011	7.22531	7.17026	biological regulation;biosynthetic process;cellular biosynthetic process;cellular macromolecule biosynthetic process;cellular macromolecule metabolic process;cellular metabolic process;cellular nitrogen compound metabolic process;cellular process;macromolecule biosynthetic process;macromolecule metabolic process;metabolic process;nitrogen compound metabolic process;nucleic acid metabolic process;…	binding;DNA binding;nucleic acid binding			+	1.41464	-0.398562	+	2.69765	-0.522293
Q2G0P7	mcsA	Protein-arginine kinase activator protein	0	0	0	0	0	0	0	0	0	0	0	0	6.1959	0	0	0	0	0
Q2G0P6	mcsB	Protein-arginine kinase	8.09691	8.09691	7.98137	0	0	0	7.98543	7.92737	7.93247	8.0086	8.04922	8.0569	8.16435	8.2014	8.15836	8.09691	8.16732	8.11059		adenyl nucleotide binding;adenyl ribonucleotide binding;ATP binding;binding;catalytic activity;kinase activity;nucleotide binding;phosphotransferase activity, alcohol group as acceptor;phosphotransferase activity, nitrogenous group as acceptor;protein kinase activity;purine nucleotide binding;purine ribonucleoside triphosphate binding;purine ribonucleotide binding;ribonucleotide binding;transfera…			+	3.5526	-4.88038	+	1.70585	0.298368
Q2G0P5	clpC	ATP-dependent Clp protease ATP-binding subunit ClpC	8.35025	8.22531	8.17319	8.38382	8.44091	8.31387	8.00432	7.96047	7.98632	7.63347	7.5966	7.62941	7.90956	8.00432	7.93601	7.44091	7.0607	6.8014	macromolecule metabolic process;metabolic process;multi-organism process;pathogenesis;primary metabolic process;protein metabolic process	adenyl nucleotide binding;adenyl ribonucleotide binding;ATP binding;binding;nucleotide binding;purine nucleotide binding;purine ribonucleoside triphosphate binding;purine ribonucleotide binding;ribonucleotide binding						+	4.52312	-1.20878	+	1.97218	-2.82018
Q2G0P2	nusG	Transcription termination/antitermination protein NusG	7.48144	7.45179	7.46389	0	0	7.25423	7.68664	7.66276	7.64738	7.44091	7.51851	7.43457	8.0569	8.14922	7.97497	7.5563	7.55509	7.52375	biological regulation;biosynthetic process;cellular biosynthetic process;cellular macromolecule metabolic process;cellular metabolic process;cellular nitrogen compound metabolic process;cellular process;macromolecule metabolic process;metabolic process;nitrogen compound metabolic process;nucleic acid metabolic process;nucleobase-containing compound metabolic process;primary metabolic process;regu…				+	1.32674	-2.27521	+	2.62551	-0.667469	+	3.25305	-1.71185
Q2G0P0	rplA	50S ribosomal protein L1	8.68124	8.68395	8.69285	8.36736	8.37291	8.3784	8.62221	8.66276	8.54654	8.58433	8.59439	8.58995	8.62634	8.6464	8.65992	8.40824	8.36736	8.38202	biological regulation;biosynthetic process;cellular biosynthetic process;cellular macromolecule biosynthetic process;cellular macromolecule metabolic process;cellular metabolic process;cellular process;cellular protein metabolic process;macromolecule biosynthetic process;macromolecule metabolic process;metabolic process;posttranscriptional regulation of gene expression;primary metabolic process;p…	binding;nucleic acid binding;RNA binding;rRNA binding;structural constituent of ribosome;structural molecule activity;tRNA binding	cell part;intracellular organelle part;intracellular part;large ribosomal subunit;macromolecular complex;organelle part;ribonucleoprotein complex	Ribosome	+	6.50293	-1.04017				+	4.12727	-0.858217
Q2G0N9	rplJ	50S ribosomal protein L10	7.80072	7.7796	7.74194	7.58659	7.64444	7.62634	7.45788	7.36736	7.32838	7.51054	7.58546	7.54777	7.17609	7.20952	7.15229	7.27646	7.29885	7.35793	biosynthetic process;cellular biosynthetic process;cellular component biogenesis;cellular component biogenesis at cellular level;cellular component organization or biogenesis;cellular component organization or biogenesis at cellular level;cellular macromolecule biosynthetic process;cellular macromolecule metabolic process;cellular metabolic process;cellular process;cellular protein metabolic proc…	binding;LSU rRNA binding;nucleic acid binding;RNA binding;rRNA binding;structural constituent of ribosome;structural molecule activity	cell part;cytoplasmic part;intracellular non-membrane-bounded organelle;intracellular organelle;intracellular part;macromolecular complex;non-membrane-bounded organelle;organelle;ribonucleoprotein complex;ribosome	Ribosome	+	2.51254	-0.514773	+	1.68514	0.542761	+	1.9584	0.43778
Q2G0N7	SAOUHSC_00523	MTS domain-containing protein	0	0	0	0	0	0	0	0	0	0	0	0	0	6.35984	0	0	0	0
Q2G0N5	rpoC	DNA-directed RNA polymerase subunit beta	7.35218	7.38021	7.41162	7.4609	7.49276	7.34242	7.46982	7.50243	7.47276	7.54033	7.46538	7.48572	7.12057	7.18469	7.25042	7.27416	7.25042	7.25285
Q2G0N1	fusA	Elongation factor G	0	0	0	0	0	0	5.84701	0	0	0	0	0	0	0	0	0	0	0
Q2G0N0	tuf	Elongation factor Tu	8.68034	8.9058	8.88536	9.47276	9.33646	8.94841	9.25527	9.22789	9.35218	9.27416	9.31597	9.18752	9.4609	9.36922	9.4133	9.44405	9.36922	9.43297
Q2G0M9	SAOUHSC_00531	M20_dimer domain-containing protein	8.52763	8.56467	8.60423	8.45332	8.46835	8.43933	8.58546	8.60423	8.58433	8.49276	8.51188	8.52892	8.64246	8.65321	8.68664	8.33244	8.37658	8.38739		catalytic activity;hydrolase activity			+	2.04051	-0.371528	+	2.54642	-0.266261	+	3.79371	-0.980974
Q2G0M8	SAOUHSC_00532	Putative pyridoxal phosphate-dependent acyltransferase	8.73078	8.66464	8.67852	8.63949	8.65514	8.64542	8.70243	8.73799	8.69108	8.66932	8.72181	8.71349	8.66932	8.68215	8.70157	8.57287	8.55145	8.57749	biosynthetic process;metabolic process	binding;catalytic activity;cofactor binding;pyridoxal phosphate binding;transferase activity;vitamin B6 binding;vitamin binding		Glycine, serine and threonine metabolism							+	3.1621	-0.388905
Q2G0M7	hchA	Protein/nucleic acid deglycase HchA	7.07188	7.1038	7.12057	7.17319	7.07918	7.12057	7.1271	7.11394	7.09342	7.17319	7.16137	7.13354	7.04139	7.0569	7.03342	7.02938	7.08991	7.01703	cellular macromolecule metabolic process;cellular metabolic process;cellular process;cellular protein metabolic process;macromolecule metabolic process;metabolic process;primary metabolic process;protein folding;protein metabolic process;protein refolding	catalytic activity;lyase activity	cell part;cytoplasm;intracellular part					+	1.36005	0.147963
Q2G0M5	SAOUHSC_00535	Uncharacterized epimerase/dehydratase SAOUHSC_00535	0	0	0	0	0	0	0	0	0	5.87613	0	0	0	0	0	0	0	0
Q2G0M4	SAOUHSC_00536	Branched-chain-amino-acid aminotransferase	9.51188	9.59439	9.63949	9.14922	9.0899	9.09342	9.4014	9.4216	9.48714	8.83378	8.77232	8.78746	9.6721	9.68124	9.74194	8.86806	8.84819	8.85733	amine biosynthetic process;amine metabolic process;biosynthetic process;branched chain family amino acid biosynthetic process;branched chain family amino acid metabolic process;carboxylic acid biosynthetic process;carboxylic acid metabolic process;cellular amine metabolic process;cellular amino acid biosynthetic process;cellular amino acid metabolic process;cellular biosynthetic process;cellular …	branched-chain-amino-acid transaminase activity;catalytic activity;L-isoleucine transaminase activity;L-leucine transaminase activity;L-valine transaminase activity;transaminase activity;transferase activity;transferase activity, transferring nitrogenous groups		Pantothenate and CoA biosynthesis;Valine, leucine and isoleucine biosynthesis;Valine, leucine and isoleucine degradation	+	3.44345	-1.56487	+	4.4407	-2.12224	+	5.50153	-2.7923
Q2G0M2	SAOUHSC_00538	Haloacid dehalogenase-like hydrolase, putative	7.40483	7.33244	7.38561	0	0	7.44309	7.5302	7.45939	7.50786	7.3962	7.52244	7.45332	7.50651	7.43775	7.49554	7.37291	7.29226	7.48287
Q2G0M1	SAOUHSC_00539	dNK domain-containing protein	7.17609	7.18184	7.3784	7.26951	7.25285	6.6981	7.13354	7.24055	7.10721	7.10037	7.09342	7.16137	7.04922	7.13033	7.09342	6.95856	6.94547	6.91222		adenyl nucleotide binding;adenyl ribonucleotide binding;ATP binding;binding;catalytic activity;kinase activity;nucleobase-containing compound kinase activity;nucleoside kinase activity;nucleotide binding;purine nucleotide binding;purine ribonucleoside triphosphate binding;purine ribonucleotide binding;ribonucleotide binding;transferase activity;transferase activity, transferring phosphorus-contai…									+	2.30068	-0.50573
Q2G0M0	SAOUHSC_00540	dNK domain-containing protein	0	0	0	0	0	0	0	5.60426	0	0	0	0	0	0	0	0	0	0
Q2G0L8	SAOUHSC_00542	Uncharacterized protein	7.88649	7.94939	7.9154	7.5955	7.84448	7.87622	7.6981	7.71096	7.74974	7.85309	7.89653	7.8848	7.66181	7.72835	7.65896	7.59439	7.58433	7.60314		catalytic activity;hydrolase activity						+	2.84434	0.526648	+	1.72689	-0.295942
Q2G0L7	azo1	FMN-dependent NADPH-azoreductase	6.75587	6.84011	6.85126	0	0	0	6.74036	6.60206	6.64738	0	0	0	0	6.68305	6.56467	0	0	0		catalytic activity;oxidoreductase activity						+	1.30415	-1.0012
Q2G0L5	sdrC	Serine-aspartate repeat-containing protein C	0	0	0	0	0	0	6.70757	6.48001	6.61278	6.60206	6.61909	6.79099	6.5832	6.51983	6.57054	6.617	0	6.71767
Q2G0L4	sdrD	Serine-aspartate repeat-containing protein D	7.50106	7.43136	7.55871	7.35984	7.3483	7.25042	7.4843	7.45939	7.42813	7.51054	7.50651	7.58206	7.4183	7.47857	7.42488	7.26717	7.31175	7.29447	biological adhesion;cell adhesion;cellular process		cell part;cell wall;external encapsulating structure;extracellular region;membrane	Staphylococcus aureus infection	+	1.6072	-0.589721	+	1.20966	0.251675	+	2.53297	-0.496471
Q2G0L3	SAOUHSC_00547	Glycos_transf_1 domain-containing protein	7.1959	7.22789	7.10037	0	0	0	7.30103	7.2878	7.51054	0	0	0	7.38561	7.40993	7.49831	0	0	0	biosynthetic process;metabolic process							+	2.59184	-3.37885	+	2.66845	-3.68939
Q2G0L2	SAOUHSC_00548	Glycos_transf_1 domain-containing protein	8.08636	7.98	8.01703	7.96802	8.14301	0	8.02531	8.01284	8.06819	8.20683	8.23805	8.25042	8	8.04139	8.11394	8.23553	8.15836	8.25527	biosynthetic process;metabolic process							+	3.12181	0.652165	+	1.67984	0.54682
Q2G0L1	folE2	GTP cyclohydrolase FolE2	0	0	7.22264	0	0	0	7.14613	7.13033	7.27184	0	7.22922	7.12057	7.36173	7.37475	7.31175	7.08279	7.30103	0
Q2G0L0	SAOUHSC_00550	Uncharacterized protein	8.26007	8.42975	8.48144	8.89542	8.84942	8.57171	8.76042	8.8014	8.90956	8.79309	8.84942	8.77525	8.35603	8.19033	8.45637	8.37658	8.37658	8.35984					+	1.46172	1.26818
Q2G0K9	SAOUHSC_00551	Uncharacterized protein	8.0569	8.12057	8.19312	8.05308	8.03342	7.93651	7.57054	7.5563	7.5966	6.62634	6.67486	6.87157	7.55145	7.77379	7.70157	6.34242	6.63246	6.71349								+	3.44174	-2.82438	+	2.98656	-3.69668
Q2G0K8	nagB	Glucosamine-6-phosphate deaminase	0	0	0	0	0	0	5.86521	0	0	0	0	0	0	0	0	0	0	0
Q2G0K7	SAOUHSC_00553	3-hexulose-6-phosphate synthase	0	0	0	0	0	0	0	0	0	0	0	0	0	0	0	0	0	5.88874
Q2G0K6	SAOUHSC_00554	SIS domain protein	0	7.01703	0	0	0	0	0	0	0	0	0	0	0	0	0	0	0	0
Q2G0K5	SAOUHSC_00555	Hydrolase, haloacid dehalogenase-like	0	0	0	0	0	0	0	0	0	0	0	0	0	0	0	7.90902	7.82086	7.80209
Q2G0J9	SAOUHSC_00561	Protein VraX	0	0	0	0	0	0	0	0	0	0	0	0	0	6.65321	0	0	0	0
Q2G0J8	SAOUHSC_00562	Phosphomethylpyrimidine kinase	6.64048	6.61066	6.84011	0	6.96237	6.86982	6.87157	6.8704	6.96237	6.99651	6.92169	6.97727	6.82672	6.83822	6.80414	6.70927	6.76268	0
Q2G0J5	SAOUHSC_00567	UPF0382 membrane protein SAOUHSC_00567	8.60097	8.58092	8.6561	8.71933	8.78604	8.66087	8.52634	8.62325	8.71933	8.68484	8.67394	8.6946	8.66932	8.79239	8.72509	8.55388	8.59329	8.53908			cell part;integral to membrane;intrinsic to membrane;membrane;membrane part;plasma membrane								+	1.88735	-0.554272
Q2G0J4	SAOUHSC_00569	Uncharacterized protein	7.50651	7.7839	7.81491	8.30963	8.27875	0	8.49831	8.48144	8.62118	8.64836	8.716	8.56467	8.64542	8.56937	8.58995	8.92737	9.03743	8.89432		active transmembrane transporter activity;amine transmembrane transporter activity;amino acid transmembrane transporter activity;carboxylic acid transmembrane transporter activity;organic acid transmembrane transporter activity;substrate-specific transmembrane transporter activity;substrate-specific transporter activity;transmembrane transporter activity;transporter activity	cell part;integral to membrane;intrinsic to membrane;membrane part								+	2.70354	1.16751
Q2G0J1	chdC	Coproheme decarboxylase	0	0	0	0	0	0	0	0	0	0	6.12998	0	0	0	0	0	0	0
Q2G0J0	SAOUHSC_00574	Phosphate acetyltransferase	7.08991	0	7.1038	0	0	0	7.31175	7.19312	7.2014	6.7332	7.22789	7.08636	7.51188	7.63144	7.38561	7.32222	7.30103	7.29003		acetyltransferase activity;catalytic activity;phosphate acetyltransferase activity;transferase activity;transferase activity, transferring acyl groups;transferase activity, transferring acyl groups other than amino-acyl groups		Carbon fixation pathways in prokaryotes;Methane metabolism;Propanoate metabolism;Pyruvate metabolism;Taurine and hypotaurine metabolism							+	1.34057	-0.681714
Q2G0I9	lipL	Octanoyl-[GcvH]:protein N-octanoyltransferase	6.89927	6.83632	6.93551	0	0	0	6.89265	6.84261	6.78533	6.88512	0	6.82413	0	0	6.71265	0	0	0
Q2G0I8	SAOUHSC_00577	Mevalonate kinase	0	0	0	0	0	0	0	6.04493	0	0	0	0	0	0	0	0	0	0
Q2G0I7	SAOUHSC_00578	Diphosphomevalonate decarboxylase	8.26245	8.22531	8.2014	8.13354	8.10721	8.17898	8.30103	8.17609	8.17319	8.12057	8.14613	8.15836	7.74194	7.64246	7.549	7.71684	7.66181	7.74272	acetyl-CoA metabolic process;biosynthetic process;cellular biosynthetic process;cellular lipid metabolic process;cellular metabolic process;cellular process;coenzyme metabolic process;cofactor metabolic process;isopentenyl diphosphate biosynthetic process;isopentenyl diphosphate biosynthetic process, mevalonate pathway;isopentenyl diphosphate metabolic process;lipid biosynthetic process;lipid met…	adenyl nucleotide binding;adenyl ribonucleotide binding;ATP binding;binding;carbon-carbon lyase activity;carboxy-lyase activity;catalytic activity;diphosphomevalonate decarboxylase activity;lyase activity;nucleotide binding;purine nucleotide binding;purine ribonucleoside triphosphate binding;purine ribonucleotide binding;ribonucleotide binding	cell part;cytoplasmic part;cytosol;intracellular part	Terpenoid backbone biosynthesis	+	1.51114	-0.298344
Q2G0I6	SAOUHSC_00579	Phosphomevalonate kinase	0	0	0	0	0	0	0	0	6.21061	0	6.24758	0	0	6.14301	6.22011	0	0	0
Q2G0I5	SAOUHSC_00580	UPF0741 protein SAOUHSC_00580	9.90417	9.95279	9.80618	10.1959	10.1614	9.86747	9.94547	10.0569	10.0453	9.83759	9.88138	9.83123	10.2068	10.1644	10.1553	10.2695	10.3054	10.2455								+	1.89186	-0.55088	+	1.84956	0.325395
Q2G0I4	SAOUHSC_00581	Uncharacterized protein	7.15229	6.95713	6.93702	0	7.04622	0	7.11059	7.11727	7.10721	7.09342	7.17026	7.17609	7.07918	7.09691	7.1038	7.03743	7.07555	7.01703	biological regulation;cell redox homeostasis;cellular homeostasis;cellular process;homeostatic process;regulation of biological process;regulation of biological quality;regulation of cellular process	binding;catalytic activity;coenzyme binding;cofactor binding;flavin adenine dinucleotide binding;oxidoreductase activity;oxidoreductase activity, acting on a sulfur group of donors;oxidoreductase activity, acting on a sulfur group of donors, NAD or NADP as acceptor;oxidoreductase activity, acting on NADH or NADPH									+	1.25736	-0.165973
Q2G0G6	SAOUHSC_00603	Aldo_ket_red domain-containing protein	7.97772	7.96237	7.94645	7.94694	8.0086	8.08279	7.70757	7.68664	7.66087	7.63649	7.67669	7.65706	7.77232	7.8202	7.83759	7.549	7.48572	7.52634		catalytic activity;oxidoreductase activity									+	3.37525	-0.962304
Q2G0G4	SAOUHSC_00605	N-acetyltransferase domain-containing protein	7.46538	7.47857	7.50106	6.72509	6.52763	6.74974	7.52114	7.51851	7.48996	7.3784	7.36173	7.33041	7.47129	7.55145	7.55991	7.38382	7.33244	7.3784		acetyltransferase activity;catalytic activity;N-acetyltransferase activity;N-acyltransferase activity;transferase activity;transferase activity, transferring acyl groups;transferase activity, transferring acyl groups other than amino-acyl groups			+	3.48005	-2.70466	+	3.04976	-0.508334	+	2.1223	-0.540363
Q2G0G3	SAOUHSC_00606	HD domain-containing protein	7.24304	7.31806	7.4843	7.49136	7.52244	7.47567	7.39445	7.37658	7.40483	7.22272	7.25285	7.18469	7.3483	7.27646	7.39967	7.09691	7.21484	7.18752								+	2.88632	-0.57093	+	1.5915	-0.581521
Q2G0G2	SAOUHSC_00607	Uncharacterized protein	8.08279	8.13354	8.06446	7.91803	8.27875	7.6981	9.68395	9.52244	9.58771	8.76193	8.87622	8.77525	8.48855	8.46835	8.58092	9.55751	9.46982	9.44248								+	3.74744	-2.63618	+	4.42718	3.24662
Q2G0G1	adh	Alcohol dehydrogenase	7.84942	8.04922	7.93601	7.66745	7.68305	7.29667	9.06819	8.86747	8.89321	8.13672	8.15229	8.1038	8.4609	8.37475	8.57864	8.6902	8.59106	8.65128		alcohol dehydrogenase (NAD) activity;binding;catalytic activity;cation binding;ion binding;metal ion binding;oxidoreductase activity;oxidoreductase activity, acting on CH-OH group of donors;oxidoreductase activity, acting on the CH-OH group of donors, NAD or NADP as acceptor;transition metal ion binding;zinc ion binding		Chloroalkane and chloroalkene degradation;Drug metabolism - cytochrome P450;Fatty acid metabolism;Glycolysis / Gluconeogenesis;Metabolism of xenobiotics by cytochrome P450;Naphthalene degradation;Retinol metabolism;Tyrosine metabolism	+	1.33345	-1.31491	+	3.63583	-2.69746	+	1.23393	0.573866
Q2G0F8	argS	Arginine--tRNA ligase	7.28749	0	0	8.07918	8.17026	7.91222	7.56467	7.34242	7.37291	8.57403	8.67578	8.62839	7.26482	7.23045	7.4014	7.98632	8.03743	8.1271	amine metabolic process;amino acid activation;arginyl-tRNA aminoacylation;carboxylic acid metabolic process;cellular amine metabolic process;cellular amino acid metabolic process;cellular ketone metabolic process;cellular macromolecule metabolic process;cellular metabolic process;cellular nitrogen compound metabolic process;cellular process;macromolecule metabolic process;metabolic process;ncRNA …	adenyl nucleotide binding;adenyl ribonucleotide binding;aminoacyl-tRNA ligase activity;arginine-tRNA ligase activity;ATP binding;binding;catalytic activity;ligase activity;ligase activity, forming aminoacyl-tRNA and related compounds;ligase activity, forming carbon-oxygen bonds;nucleotide binding;purine nucleotide binding;purine ribonucleoside triphosphate binding;purine ribonucleotide binding;ri…	cell part;cytoplasm;intracellular part	Aminoacyl-tRNA biosynthesis	+	1.85358	4.745	+	4.03697	3.98432	+	3.4571	2.49608
Q2G0F6	SAOUHSC_00613	Iron compound ABC transporter, substrate-binding protein, putative	8.60423	8.60097	8.5172	9.38561	9.55751	9.38021	8.89209	8.72509	8.7767	9.78032	9.86923	9.77306	8.45179	8.41664	8.62941	9.63649	9.64147	9.79029				ABC transporters	+	3.7432	2.88003	+	4.18677	3.35372	+	3.86272	3.95355
Q2G0F3	SAOUHSC_00616	AB hydrolase-1 domain-containing protein	7.57519	7.44716	7.50786	8.10037	8.09691	8.07555	7.86153	7.75664	7.84634	8.24304	8.28556	8.33846	7.716	7.74507	7.89982	8.07918	8.26482	8.2878					+	3.98122	1.92963	+	3.39866	1.55305	+	2.0802	1.40728
Q2G0F2	SAOUHSC_00617	Uncharacterized protein	8.52114	8.47129	8.41162	9.75205	9.81291	9.55023	8.86392	8.69285	8.81425	10.1732	10.2601	10.2068	8.49415	8.45788	8.70415	10.017	9.97451	10.1072					+	3.87792	4.10938	+	4.82319	4.72718	+	4.1725	4.9193
Q2G0F1	SAOUHSC_00618	Uncharacterized protein	7.91698	7.83948	7.82413	9.23805	9.3032	9.21484	8.50651	8.29667	8.35793	9.63246	9.69636	9.6637	8.0899	8.03342	8.1038	9.27416	9.26717	9.3784					+	5.43183	4.62357	+	4.40334	4.24256	+	5.09659	4.08884
Q2G0E9	SAOUHSC_00656	DhaL domain-containing protein	7.05308	7.17898	7.25042	8.65225	8.79518	8.48001	7.71517	7.43457	7.62428	9.27184	9.34439	9.1959	7.46982	7.46687	7.64246	9.0569	9.08279	9.23045	alcohol metabolic process;alditol metabolic process;carbohydrate metabolic process;cellular carbohydrate metabolic process;cellular metabolic process;cellular process;glycerol metabolic process;metabolic process;polyol metabolic process;primary metabolic process;small molecule metabolic process	catalytic activity;glycerone kinase activity;kinase activity;phosphotransferase activity, alcohol group as acceptor;transferase activity;transferase activity, transferring phosphorus-containing groups		Glycerolipid metabolism	+	3.78889	4.92195	+	4.25521	5.57875	+	4.44471	5.3051
Q2G0E8	SAOUHSC_00658	Phosphoenolpyruvate--glycerone phosphotransferase	7.53403	7.51188	7.60853	7.79588	7.66558	7.62221	7.62737	7.62737	7.66276	7.50243	7.6149	7.54654	7.52892	7.51054	7.61384	7.36736	7.50106	7.48714	carbohydrate transport;establishment of localization;organic substance transport;phosphoenolpyruvate-dependent sugar phosphotransferase system;transport		cell part;integral to membrane;intrinsic to membrane;membrane part					+	1.14314	-0.280838
Q2G0E6	SAOUHSC_00660	Uncharacterized protein	7.11394	6.99913	7.03743	0	0	0	7.06446	7.02119	7.01284	6.83315	6.84572	6.67394	6.92686	6.93044	6.9154	6.85552	6.86213	6.85974					+	2.41683	-1.26039	+	1.90456	-0.825696	+	3.72119	-0.216265
Q2G0E5	SAOUHSC_00661	Abhydrolase_3 domain-containing protein	8.37475	8.34439	8.21219	8.31175	8.39445	8.50786	8.01284	7.97589	8.11059	7.6902	7.77159	7.83632	7.97589	8.02531	8.02531	7.60638	7.6981	7.68485		catalytic activity;hydrolase activity						+	1.99177	-0.887188	+	3.32752	-1.14847
Q2G0E2	SAOUHSC_00663	N-acetyltransferase domain-containing protein	0	0	0	0	0	0	0	0	0	0	0	0	0	0	0	0	0	0
Q2G0E1	graX	Auxiliary protein GraX	9.15229	9.12057	9.13672	8.92012	9.04139	9.18469	8.9722	8.98137	9.05308	8.37475	8.35984	8.40483	8.92993	9.0607	8.95182	8.43933	8.47276	8.4456								+	4.56734	-2.0676	+	3.64976	-1.75482
Q2G0E0	graR	Response regulator protein GraR	0	0	0	0	6.51348	0	6.43136	6.40993	6.4609	0	0	0	0	6.35218	6.45179	0	0	0	biological regulation;biosynthetic process;cellular biosynthetic process;cellular macromolecule biosynthetic process;cellular macromolecule metabolic process;cellular metabolic process;cellular nitrogen compound metabolic process;cellular process;cellular response to stimulus;macromolecule biosynthetic process;macromolecule metabolic process;metabolic process;multi-organism process;nitrogen compo…	binding;DNA binding;nucleic acid binding	cell part;cytoplasm;intracellular part	Two-component system				+	1.43347	0.834029
Q2G0D9	graS	Sensor histidine kinase GraS	6.80414	7.10721	6.84198	7.56703	7.54654	7.56937	7.21219	7.233	7.39093	7.48855	7.46687	7.27646	7.17026	7.13672	7.20683	7.19033	7.0569	7.18469	multi-organism process;pathogenesis;response to antibiotic;response to chemical stimulus;response to stimulus	adenyl nucleotide binding;adenyl ribonucleotide binding;ATP binding;binding;catalytic activity;kinase activity;molecular transducer activity;nucleotide binding;phosphotransferase activity, alcohol group as acceptor;phosphotransferase activity, nitrogenous group as acceptor;protein histidine kinase activity;protein kinase activity;purine nucleotide binding;purine ribonucleoside triphosphate bindin…	cell part;integral to membrane;intrinsic to membrane;membrane;membrane part;plasma membrane	Two-component system	+	2.59448	2.13667
Q2G0D8	SAOUHSC_00667	ABC transporter ATP-binding protein, putative	7.78176	7.65418	7.69897	0	0	0	7.84198	7.85733	7.83378	0	0	0	7.58206	7.48855	7.62118	7.7839	7.92273	7.83632		adenyl nucleotide binding;adenyl ribonucleotide binding;ATP binding;ATPase activity;binding;catalytic activity;hydrolase activity;hydrolase activity, acting on acid anhydrides;hydrolase activity, acting on acid anhydrides, in phosphorus-containing anhydrides;nucleoside-triphosphatase activity;nucleotide binding;purine nucleotide binding;purine ribonucleoside triphosphate binding;purine ribonucleo…		ABC transporters;Staphylococcus aureus infection;Two-component system	+	3.49296	-3.73948	+	3.79216	-3.86627	+	2.13362	0.942501
Q2G0D6	SAOUHSC_00669	Uncharacterized protein	7.03743	7.1959	7.14613	7.34242	7.47276	0	6.96284	6.97035	6.96284	0	0	0	7.16732	7.07555	7.01284	6.80414	6.8169	0								+	1.26018	-1.15147	+	2.115	-1.06684
Q2G0D4	SAOUHSC_00671	Probable autolysin SsaALP	0	0	0	0	0	0	0	5.83751	0	0	0	0	0	0	0	0	0	0
Q2G0D1	sarX	HTH-type transcriptional regulator SarX	6.84757	6.7839	6.98453	0	0	0	6.64246	0	6.81023	6.716	6.74819	6.79239	6.73799	7	6.92117	6.87448	6.89708	6.91222
Q2G0D0	SAOUHSC_00675	Probable transcriptional regulatory protein SAOUHSC_00675	0	0	0	0	0	0	0	0	0	0	0	0	7.24551	7.37107	6.64246	6.81954	6.98632	0
Q2G0C9	SAOUHSC_00676	Cupin_5 domain-containing protein	0	0	6.79155	0	0	0	6.81823	6.8169	6.78958	6.80889	6.79657	6.78462	6.72509	6.87274	6.81954	6.68395	6.76938	6.75128
Q2G0C7	SAOUHSC_00678	DUF402 domain-containing protein	0	0	0	0	0	0	6.56831	0	0	0	0	0	0	0	0	0	0	6.84136
Q2G0C6	SAOUHSC_00679	HTH lysR-type domain-containing protein	7.94498	7.91487	7.90741	0	0	0	7.55509	7.58883	7.55871	7.30963	7.26717	7.4183	7.31806	7.50106	7.43457	7.43616	7.42975	7.4216	biosynthetic process;cellular biosynthetic process;cellular macromolecule biosynthetic process;cellular macromolecule metabolic process;cellular metabolic process;cellular nitrogen compound metabolic process;cellular process;macromolecule biosynthetic process;macromolecule metabolic process;metabolic process;nitrogen compound metabolic process;nucleic acid metabolic process;nucleobase-containing …	binding;DNA binding;nucleic acid binding;nucleic acid binding transcription factor activity;sequence-specific DNA binding transcription factor activity			+	3.70974	-4.11507	+	2.15562	-0.783456
Q2G0B9	SAOUHSC_00686	Uncharacterized protein	8.0086	8.1959	7.9987	8.45332	8.3962	8.15229	8.24304	8.23045	8.21748	8.08279	8.12385	8.04922	8.16137	8.10721	8.17026	8.14613	8.12385	8.10721								+	2.50391	-0.481808
Q2G0B7	SAOUHSC_00688	Cytokinin riboside 5-monophosphate phosphoribohydrolase	0	0	0	0	0	0	0	0	0	0	0	0	6.40654	7.09691	0	8.16435	8.0086	8.09342
Q2G0B5	SAOUHSC_00690	Uncharacterized protein	0	0	0	0	0	0	0	6.37548	0	0	0	0	0	0	0	0	0	0
Q2G0B4	uppP	Undecaprenyl-diphosphatase	0	0	0	0	0	0	0	0	0	0	0	0	0	6.78533	0	0	0	0
Q2G0B3	SAOUHSC_00692	Uncharacterized protein	0	0	0	0	0	0	0	0	0	0	0	0	0	0	0	0	0	0
Q2G0B2	SAOUHSC_00693	Uncharacterized protein	8.66652	8.60097	8.61909	8.60853	8.55388	8.47129	8.78958	8.87852	8.92169	8.79518	8.86747	8.81491	9.09691	9.01284	9.04922	9.44716	9.23805	9.31597		active transmembrane transporter activity;adenyl nucleotide binding;adenyl ribonucleotide binding;ATP binding;ATPase activity;ATPase activity, coupled;ATPase activity, coupled to movement of substances;ATPase activity, coupled to transmembrane movement of substances;binding;catalytic activity;hydrolase activity;hydrolase activity, acting on acid anhydrides;hydrolase activity, acting on acid anhyd…	cell part;integral to membrane;intrinsic to membrane;membrane part	ABC transporters							+	1.88896	0.932587
Q2G0B1	mgrA	HTH-type transcriptional regulator MgrA	8.90849	8.96567	8.89542	9.07918	9.00432	8.89653	8.80686	8.83059	8.88423	8.4624	8.44405	8.49415	8.60959	8.7332	8.72591	8.32222	8.2833	8.32634	biosynthetic process;cellular biosynthetic process;cellular macromolecule biosynthetic process;cellular macromolecule metabolic process;cellular metabolic process;cellular nitrogen compound metabolic process;cellular process;macromolecule biosynthetic process;macromolecule metabolic process;metabolic process;multi-organism process;nitrogen compound metabolic process;nucleic acid metabolic process…	binding;DNA binding;nucleic acid binding;nucleic acid binding transcription factor activity;sequence-specific DNA binding transcription factor activity	cell part;cytoplasm;intracellular part					+	3.79101	-1.24138	+	3.0651	-1.25884
Q2G0B0	SAOUHSC_00695	CobW C-terminal domain-containing protein	8.90417	8.80821	8.8293	9.02938	8.95521	8.98901	8.70329	8.7185	8.75664	8.55267	8.55991	8.55991	8.55023	8.6053	8.66558	8.26245	8.28556	8.2878					+	1.78568	0.478253	+	3.33382	-0.560241	+	3.1783	-1.09104
Q2G0A6	SAOUHSC_00699	Deoxyribodipyrimidine photolyase, putative	0	0	0	0	0	0	0	0	0	0	0	0	0	6.46389	0	0	0	0
Q2G0A3	SAOUHSC_00702	PPC domain-containing protein	7.31806	7.33041	7.2878	0	7.26007	7.33445	7.16732	7.01284	7.18184	7.16435	7.16435	7.27416	7.02119	7.03342	6.98677	7.0569	7.04532	7.04922											+	1.19961	0.121871
Q2G0A0	SAOUHSC_00705	Cys-tRNA(Pro)/Cys-tRNA(Cys) deacylase	7.65321	7.61805	7.66745	7.4183	7.46835	7.3075	7.58771	7.63448	7.66181	7.5302	7.54654	7.59439	7.73078	7.81291	7.68485	7.26007	7.34635	7.20952	biosynthetic process;cellular biosynthetic process;cellular macromolecule biosynthetic process;cellular macromolecule metabolic process;cellular metabolic process;cellular process;cellular protein metabolic process;macromolecule biosynthetic process;macromolecule metabolic process;metabolic process;primary metabolic process;protein metabolic process;translation	aminoacyl-tRNA editing activity;carboxylic ester hydrolase activity;catalytic activity;hydrolase activity;hydrolase activity, acting on ester bonds;lyase activity			+	2.1223	-0.824469	+	1.15195	-0.235708	+	2.99767	-1.56419
Q2G097	SAOUHSC_00724	Chorismate binding enzyme, putative	8.69373	8.8202	8.64933	9.06819	9.0607	8.56229	9.02531	9	9.09342	8.98767	9.02531	9.01284	9.19866	9.07555	9.04922	9.12385	9.13033	9.11394
Q2G095	SAOUHSC_00726	AHS1 domain-containing protein	6.94349	6.97955	6.96473	0	6.96409	0	7.04922	6.97174	6.89265	7.02531	7.02938	6.99344	6.83315	6.80686	6.78817	6.88536	7.02531	6.98856											+	1.63468	0.521601
Q2G094	SAOUHSC_00727	AHS2 domain-containing protein	8.5611	8.51188	8.56467	8.29667	8.33041	8.38739	8.19312	8.233	8.21748	8.3032	8.29885	8.32428	8.11727	8.18469	8.21484	8.03743	8.0086	8.02119					+	2.56343	-0.690055	+	2.59431	0.313066	+	2.12277	-0.497836
Q2G093	ltaS	Lipoteichoic acid synthase	7.39967	7.3962	7.44404	0	0	0	7.14922	7.06446	7.00432	6.84559	0	7.11727	6.82737	6.96708	6.935	7.11727	6.84942	7.06446	biosynthetic process;carbohydrate biosynthetic process;carbohydrate metabolic process;cell wall macromolecule biosynthetic process;cell wall macromolecule metabolic process;cell wall organization;cell wall organization or biogenesis;cellular biosynthetic process;cellular carbohydrate metabolic process;cellular cell wall macromolecule metabolic process;cellular cell wall organization or biogenesis…	binding;catalytic activity;cation binding;hydrolase activity;hydrolase activity, acting on ester bonds;ion binding;metal ion binding;sulfuric ester hydrolase activity;transferase activity	cell part;extracellular region;integral to membrane;intrinsic to membrane;membrane;membrane part;plasma membrane		+	3.36932	-3.73757
Q2G091	SAOUHSC_00729	ABC transporter, ATP-binding protein	7.77743	7.81157	7.84073	7.61172	7.72181	7.80889	7.83059	7.83632	7.82866	7.80003	7.81558	7.79518	7.66652	7.67486	7.72099	7.70757	7.76938	7.79309		adenyl nucleotide binding;adenyl ribonucleotide binding;ATP binding;ATPase activity;binding;catalytic activity;hydrolase activity;hydrolase activity, acting on acid anhydrides;hydrolase activity, acting on acid anhydrides, in phosphorus-containing anhydrides;nucleoside-triphosphatase activity;nucleotide binding;purine nucleotide binding;purine ribonucleoside triphosphate binding;purine ribonucleo…						+	1.89902	-0.0938791	+	1.06297	0.22996
Q2G089	SAOUHSC_00731	ABC transporter domain protein	0	0	0	0	0	0	0	0	0	0	0	0	7.14301	7.10037	7.08991	7.40824	7.40993	7.3927		adenyl nucleotide binding;adenyl ribonucleotide binding;ATP binding;ATPase activity;binding;catalytic activity;hydrolase activity;hydrolase activity, acting on acid anhydrides;hydrolase activity, acting on acid anhydrides, in phosphorus-containing anhydrides;nucleoside-triphosphatase activity;nucleotide binding;purine nucleotide binding;purine ribonucleoside triphosphate binding;purine ribonucleo…		ABC transporters							+	4.15997	0.971752
Q2G088	SAOUHSC_00732	Amino acid ABC transporter, permease protein, putative	8.18752	8.10721	8.15229	8.01703	8.11727	8.10037	8.31175	8.25042	8.22011	8.06819	8.11059	8.13672	8.04139	8.03342	8.06446	7.96708	7.93247	7.93702		transporter activity	cell part;integral to membrane;intrinsic to membrane;membrane;membrane part;plasma membrane	ABC transporters				+	2.01109	-0.516876	+	2.67216	-0.335188
Q2G087	hisC	Histidinol-phosphate aminotransferase	8.5682	8.549	8.55388	7.89321	7.97359	8.14922	8.69548	8.66652	8.71012	8.21748	8.22531	8.20951	8.72263	8.66652	8.76193	8.46538	8.43933	8.43616	amine biosynthetic process;amine metabolic process;biosynthetic process;carboxylic acid biosynthetic process;carboxylic acid metabolic process;cellular amine metabolic process;cellular amino acid biosynthetic process;cellular amino acid metabolic process;cellular biosynthetic process;cellular ketone metabolic process;cellular metabolic process;cellular nitrogen compound biosynthetic process;cellu…	binding;catalytic activity;cofactor binding;histidinol-phosphate transaminase activity;L-phenylalanine aminotransferase activity;L-phenylalanine:2-oxoglutarate aminotransferase activity;pyridoxal phosphate binding;transaminase activity;transferase activity;transferase activity, transferring nitrogenous groups;vitamin B6 binding;vitamin binding		Histidine metabolism;Novobiocin biosynthesis;Phenylalanine metabolism;Phenylalanine, tyrosine and tryptophan biosynthesis;Tropane, piperidine and pyridine alkaloid biosynthesis;Tyrosine metabolism	+	2.72253	-1.83268	+	5.39079	-1.57217	+	3.1198	-0.897144
Q2G086	SAOUHSC_00734	Putative 5(3)-deoxyribonucleotidase	7.66087	7.60638	7.65031	7.44404	7.42975	7.42975	7.42488	7.44404	7.43297	7.56703	7.52892	7.55871	7.47712	7.55991	7.47129	7.55145	7.49554	7.53782	catabolic process;cellular catabolic process;cellular metabolic process;cellular nitrogen compound catabolic process;cellular nitrogen compound metabolic process;cellular process;deoxyribonucleotide catabolic process;deoxyribonucleotide metabolic process;metabolic process;nitrogen compound metabolic process;nucleobase-containing compound catabolic process;nucleobase-containing compound metabolic …	5'-nucleotidase activity;catalytic activity;hydrolase activity;hydrolase activity, acting on ester bonds;nucleotidase activity;phosphatase activity;phosphoric ester hydrolase activity			+	3.52944	-0.679893	+	3.10364	0.390609
Q2G084	SAOUHSC_00736	Putative lipid kinase SAOUHSC_00736	6.70586	0	6.67302	0	0	0	0	0	6.6179	0	0	0	0	0	0	0	0	0
Q2G082	SAOUHSC_00738	MFS domain-containing protein	0	6.41574	0	0	0	0	0	0	0	0	0	0	0	0	0	0	0	0
Q2G081	queF	NADPH-dependent 7-cyano-7-deazaguanine reductase	6.88762	6.9345	7.10037	0	0	0	7.53656	7.45637	7.62634	6.94988	7.24551	7.31806	7.79449	7.83442	7.83632	7.43933	7.55509	7.52892	7-methylguanosine biosynthetic process;7-methylguanosine metabolic process;biosynthetic process;cellular biosynthetic process;cellular macromolecule metabolic process;cellular metabolic process;cellular nitrogen compound biosynthetic process;cellular nitrogen compound metabolic process;cellular process;guanosine biosynthetic process;guanosine metabolic process;heterocycle biosynthetic process;het…	catalytic activity;oxidoreductase activity;oxidoreductase activity, acting on NADH or NADPH;oxidoreductase activity, acting on NADH or NADPH, nitrogenous group as acceptor;oxidoreductase activity, acting on other nitrogenous compounds as donors;oxidoreductase activity, acting on other nitrogenous compounds as donors, with NAD or NADP as acceptor;oxidoreductase activity, acting on the CH-NH group …	cell part;cytoplasm;intracellular part		+	2.04051	-1.20337	+	1.39888	-1.22448	+	2.94864	-1.04296
Q2G079	nrdI	Protein NrdI	6.989	7.0086	6.98543	0	0	0	7.20952	7.15534	7.26717	0	7.07416	7.01284	7.17898	7.29003	7.08279	0	0	0					+	2.07995	-1.1134				+	3.1721	-2.80657
Q2G078	SAOUHSC_00742	Ribonucleoside-diphosphate reductase	8.99782	8.90795	8.92788	8.3075	8.42488	8.50651	9.02938	8.94201	9.00432	8.52634	8.60638	8.54283	8.97818	8.87795	8.92686	8.71933	8.64836	8.72835	biosynthetic process;cellular biosynthetic process;cellular macromolecule biosynthetic process;cellular macromolecule metabolic process;cellular metabolic process;cellular nitrogen compound metabolic process;cellular process;DNA metabolic process;DNA replication;macromolecule biosynthetic process;macromolecule metabolic process;metabolic process;nitrogen compound metabolic process;nucleic acid me…	adenyl nucleotide binding;adenyl ribonucleotide binding;ATP binding;binding;catalytic activity;nucleotide binding;oxidoreductase activity;oxidoreductase activity, acting on CH or CH2 groups;oxidoreductase activity, acting on CH or CH2 groups, disulfide as acceptor;purine nucleotide binding;purine ribonucleoside triphosphate binding;purine ribonucleotide binding;ribonucleoside-diphosphate reductas…		Purine metabolism;Pyrimidine metabolism	+	2.94384	-1.76591	+	3.58095	-1.43969	+	2.3996	-0.760653
Q2G077	SAOUHSC_00743	Ribonucleoside-diphosphate reductase	8.17319	7.93651	8.0086	8.03342	7.98227	8.00432	7.62839	7.64542	7.72263	7.27184	7.21484	7.29885	7.65128	7.63749	7.56467	7.28103	7.26007	7.24551	biosynthetic process;cellular biosynthetic process;cellular metabolic process;cellular nitrogen compound biosynthetic process;cellular nitrogen compound metabolic process;cellular process;deoxyribonucleoside diphosphate metabolic process;deoxyribonucleotide biosynthetic process;deoxyribonucleotide metabolic process;metabolic process;nitrogen compound metabolic process;nucleobase-containing compou…	catalytic activity;oxidoreductase activity;oxidoreductase activity, acting on CH or CH2 groups;oxidoreductase activity, acting on CH or CH2 groups, disulfide as acceptor;ribonucleoside-diphosphate reductase activity	cell part;cytoplasmic part;intracellular part;macromolecular complex;protein complex;ribonucleoside-diphosphate reductase complex	Purine metabolism;Pyrimidine metabolism				+	3.34616	-1.34085	+	3.60815	-1.1813
Q2G071	SAOUHSC_00749	Fe/B12 periplasmic-binding domain-containing protein	8.43933	8.41497	8.40312	8.34044	8.3075	8.51587	8.29003	8.29226	8.31387	8.3032	8.3075	8.33846	8.33041	8.3483	8.35218	8.2833	8.25527	8.2878				ABC transporters							+	2.30017	-0.226473
Q2G070	SAOUHSC_00751	CHY-type domain-containing protein	0	0	0	0	0	0	0	0	0	0	5.90244	0	0	0	0	0	0	0
Q2G069	murB	UDP-N-acetylenolpyruvoylglucosamine reductase	6.80346	6.81358	6.74194	0	0	0	6.69636	6.52114	0	6.78556	0	6.95999	6.66276	6.59218	6.79796	0	0	0	amine metabolic process;aminoglycan biosynthetic process;aminoglycan metabolic process;biological regulation;biosynthetic process;carbohydrate biosynthetic process;carbohydrate metabolic process;cell cycle;cell division;cell wall macromolecule biosynthetic process;cell wall macromolecule metabolic process;cell wall organization;cell wall organization or biogenesis;cellular biosynthetic process;ce…	binding;catalytic activity;coenzyme binding;cofactor binding;flavin adenine dinucleotide binding;oxidoreductase activity;oxidoreductase activity, acting on CH-OH group of donors;oxidoreductase activity, acting on the CH-OH group of donors, NAD or NADP as acceptor;UDP-N-acetylmuramate dehydrogenase activity	cell part;cytoplasm;intracellular part	Amino sugar and nucleotide sugar metabolism;Peptidoglycan biosynthesis							+	2.35665	-1.62385
Q2G067	SAOUHSC_00754	Uncharacterized protein	8.35025	8.68484	8.57171	8.78817	8.77011	8.71517	8.65514	8.73957	8.88762	8.46538	8.44405	8.43136	8.55267	8.6946	8.71767	8.00432	8.15836	7.95952								+	1.98906	-1.04257	+	2.82501	-2.04048
Q2G066	SAOUHSC_00755	Uncharacterized protein	7.25042	6.97267	7.03743	0	7	0	7.0607	6.9987	7.03743	7.1038	7.22272	7.17898	7.17609	7.10721	7.16435	7.0086	7.03743	6.98945								+	1.59579	0.452533	+	2.24506	-0.456408
Q2G065	SAOUHSC_00756	Uncharacterized protein	8.85309	8.82086	8.82543	8.79796	8.80346	8.74663	8.97451	8.98677	8.98588	8.93952	8.95085	8.93802	8.77743	8.85065	8.80821	8.89708	8.91062	8.91645	cellular metabolic process;cellular process;metabolic process;organic acid metabolic process;organic acid phosphorylation;phosphate-containing compound metabolic process;phosphorus metabolic process;phosphorylation;small molecule metabolic process	catalytic activity;glycerate kinase activity;kinase activity;phosphotransferase activity, alcohol group as acceptor;transferase activity;transferase activity, transferring phosphorus-containing groups		Glycerolipid metabolism;Glycine, serine and threonine metabolism;Glyoxylate and dicarboxylate metabolism;Methane metabolism				+	2.65939	-0.131514	+	1.91996	0.318763
Q2G064	pepT	Peptidase T	8.69373	8.68574	8.67669	8.73078	8.77085	8.5092	8.89818	8.87622	8.85309	8.79239	8.81023	8.80414	9.24551	9.32838	9.31175	8.81624	8.8109	8.80821	catabolic process;cellular catabolic process;cellular metabolic process;cellular process;metabolic process;peptide catabolic process;peptide metabolic process	aminopeptidase activity;binding;catalytic activity;cation binding;exopeptidase activity;hydrolase activity;ion binding;metal ion binding;metallopeptidase activity;peptidase activity;peptidase activity, acting on L-amino acid peptides;transition metal ion binding;tripeptidase activity;tripeptide aminopeptidase activity;zinc ion binding	cell part;cytoplasm;intracellular part					+	2.19903	-0.244406	+	4.34642	-1.60592
Q2G061	SAOUHSC_00760	Uncharacterized membrane protein SAOUHSC_00760	0	0	0	0	0	0	0	0	0	0	0	0	7.06446	7.32634	7.04532	0	0	0
Q2G059	SAOUHSC_00763	Uncharacterized protein	7.78176	7.62118	7.60097	7.50106	7.5302	7.56703	7.50243	7.45939	7.43457	7.54407	7.50379	7.58659	7.60423	7.78675	7.50786	7.43457	7.48996	7.54158								+	1.201	0.263603
Q2G058	SAOUHSC_00764	Uncharacterized protein	7.67852	8.18752	8.10721	8.12057	8.0086	8.08636	7.85309	7.94939	8.03743	7.89432	7.84198	7.84942	7.79865	7.92634	7.91434	7.75891	7.89597	7.77085
Q2G055	hpf	Ribosome hibernation promotion factor	8.36549	8.37658	8.37107	8.25527	8.31597	8.34044	8.2014	8.27184	8.15534	8.27646	8.3483	8.31387	8.27646	8.4014	8.26951	8.34635	8.30963	8.34439	metabolic process;primary metabolic process							+	1.22231	0.343331
Q2G052	prfB	Peptide chain release factor 2	0	0	0	0	0	0	0	0	0	0	0	0	0	6.23805	0	0	0	0
Q2G050	SAOUHSC_00776	Excinuclease ABC, B subunit	7.08636	7.16732	7.22011	0	0	0	7.07918	6.95761	6.98677	0	0	0	7.24055	7.25768	7.18469	0	0	0	cell communication;cellular macromolecule metabolic process;cellular metabolic process;cellular nitrogen compound metabolic process;cellular process;cellular response to external stimulus;cellular response to extracellular stimulus;cellular response to stimulus;cellular response to stress;DNA metabolic process;DNA repair;macromolecule metabolic process;metabolic process;nitrogen compound metaboli…	adenyl nucleotide binding;adenyl ribonucleotide binding;ATP binding;binding;catalytic activity;deoxyribonuclease activity;DNA binding;endodeoxyribonuclease activity;endonuclease activity;excinuclease ABC activity;hydrolase activity;hydrolase activity, acting on ester bonds;nuclease activity;nucleic acid binding;nucleotide binding;purine nucleotide binding;purine ribonucleoside triphosphate bindin…		Nucleotide excision repair				+	1.91802	-2.76456	+	4.25638	-3.06203
Q2G047	SAOUHSC_00779	Excinuclease ABC subunit B, putative	8.17609	8.35411	8.45025	8.1038	8.04139	7.95328	8.21484	8.24055	8.18184	8.14922	8.17319	8.18752	8.0607	8.16435	8.16137	8.11059	8.07555	8.06446	cell communication;cellular macromolecule metabolic process;cellular metabolic process;cellular nitrogen compound metabolic process;cellular process;cellular response to external stimulus;cellular response to extracellular stimulus;cellular response to stimulus;cellular response to stress;DNA metabolic process;DNA repair;macromolecule metabolic process;metabolic process;nitrogen compound metaboli…	adenyl nucleotide binding;adenyl ribonucleotide binding;ATP binding;binding;catalytic activity;deoxyribonuclease activity;DNA binding;endodeoxyribonuclease activity;endonuclease activity;excinuclease ABC activity;hydrolase activity;hydrolase activity, acting on ester bonds;nuclease activity;nucleic acid binding;nucleotide binding;purine nucleotide binding;purine ribonucleoside triphosphate bindin…	cell part;cytoplasm;intracellular part	Nucleotide excision repair	+	1.48944	-0.97662
Q2G046	uvrA	UvrABC system protein A	7.7574	7.76864	7.80821	7.64933	7.80618	7.85914	7.75282	7.71517	7.69461	7.76042	7.78675	7.85003	7.51054	7.54283	7.57634	7.62941	7.65128	7.68215	cell communication;cellular macromolecule metabolic process;cellular metabolic process;cellular nitrogen compound metabolic process;cellular process;cellular response to external stimulus;cellular response to extracellular stimulus;cellular response to stimulus;cellular response to stress;DNA metabolic process;DNA repair;macromolecule metabolic process;metabolic process;nitrogen compound metaboli…	adenyl nucleotide binding;adenyl ribonucleotide binding;ATP binding;ATPase activity;binding;catalytic activity;cation binding;deoxyribonuclease activity;DNA binding;endodeoxyribonuclease activity;endonuclease activity;excinuclease ABC activity;hydrolase activity;hydrolase activity, acting on acid anhydrides;hydrolase activity, acting on acid anhydrides, in phosphorus-containing anhydrides;hydrola…	cell part;cytoplasm;excinuclease repair complex;intracellular part;macromolecular complex;protein complex	Nucleotide excision repair				+	1.16432	0.259796	+	1.98321	0.368869
Q2G045	hprK	HPr kinase/phosphorylase	7.62531	7.55023	7.60206	7.55023	7.66276	7.62737	7.57634	7.63144	7.61384	7.81757	7.79099	7.8014	7.53275	7.63347	7.6464	7.69285	7.69373	7.6981	biological regulation;carbohydrate metabolic process;metabolic process;primary metabolic process;regulation of biological process;regulation of carbohydrate metabolic process;regulation of metabolic process;regulation of primary metabolic process	adenyl nucleotide binding;adenyl ribonucleotide binding;ATP binding;binding;catalytic activity;cation binding;ion binding;kinase activity;magnesium ion binding;metal ion binding;molecular transducer activity;nucleotide binding;phosphotransferase activity, alcohol group as acceptor;phosphotransferase activity, nitrogenous group as acceptor;protein histidine kinase activity;protein kinase activity;…						+	3.39529	0.651465	+	1.18557	0.301242
Q2G044	lgt	Phosphatidylglycerol--prolipoprotein diacylglyceryl transferase	8.5092	8.53403	8.53908	8.36922	8.44405	8.49969	8.56585	8.57519	8.54407	8.43457	8.47567	8.51983	8.4456	8.5092	8.51188	8.31806	8.2878	8.26482	biosynthetic process;cellular biosynthetic process;cellular macromolecule biosynthetic process;cellular macromolecule metabolic process;cellular metabolic process;cellular process;cellular protein metabolic process;lipoprotein biosynthetic process;lipoprotein metabolic process;macromolecule biosynthetic process;macromolecule metabolic process;macromolecule modification;metabolic process;primary m…	catalytic activity;phosphatidylglycerol-prolipoprotein diacylglyceryl transferase activity;transferase activity;transferase activity, transferring glycosyl groups	cell part;integral to membrane;intrinsic to membrane;membrane;membrane part;plasma membrane					+	1.49681	-0.282403	+	2.76583	-0.659965
Q2G041	SAOUHSC_00785	Thioredoxin reductase	9.25042	9.25042	9.26717	9.12057	9.13354	9.13988	9.26717	9.28556	9.25527	9.21484	9.17609	9.20683	9.13988	9.21219	9.17898	9.15836	9.11727	9.11394	cellular metabolic process;cellular process;cellular response to chemical stimulus;cellular response to oxidative stress;cellular response to oxygen radical;cellular response to reactive oxygen species;cellular response to stimulus;cellular response to stress;cellular response to superoxide;metabolic process;reactive oxygen species metabolic process;removal of superoxide radicals;response to chem…	antioxidant activity;binding;catalytic activity;coenzyme binding;cofactor binding;flavin adenine dinucleotide binding;oxidoreductase activity;oxidoreductase activity, acting on a sulfur group of donors;oxidoreductase activity, acting on a sulfur group of donors, NAD or NADP as acceptor;oxidoreductase activity, acting on NADH or NADPH;thioredoxin-disulfide reductase activity	cell part;cytoplasm;intracellular part	Pyrimidine metabolism;Selenocompound metabolism	+	4.01176	-0.414156	+	2.04924	-0.232801
Q2G039	SAOUHSC_00787	Nucleotide-binding protein SAOUHSC_00787	0	6.43775	6.40312	0	0	0	6.57973	0	0	0	0	0	0	6.43297	0	0	0	0
Q2G038	SAOUHSC_00788	Gluconeogenesis factor	0	0	0	0	0	0	7.07555	7.14922	6.96802	0	0	0	8.11394	8.26482	7.95085	7.29226	7.29667	7.22011	biological regulation;regulation of anatomical structure morphogenesis;regulation of biological process;regulation of biological quality;regulation of cell morphogenesis;regulation of cell shape;regulation of cellular component organization;regulation of cellular process;regulation of developmental process		cell part;cytoplasm;intracellular part		+	1.89116	2.62372	+	3.06319	-1.8851	+	3.06239	-2.79107
Q2G037	whiA	Probable cell division protein WhiA	7.96237	7.88024	7.95665	7.52504	7.74741	7.72916	8.07555	8.06446	8.07555	7.92737	7.9425	7.91855	8.78104	8.85065	8.65418	8.4133	8.45939	8.38561	biological regulation;biosynthetic process;cellular biosynthetic process;cellular macromolecule biosynthetic process;cellular macromolecule metabolic process;cellular metabolic process;cellular nitrogen compound metabolic process;cellular process;macromolecule biosynthetic process;macromolecule metabolic process;metabolic process;nitrogen compound metabolic process;nucleic acid metabolic process;…	binding;catalytic activity;DNA binding;endonuclease activity;hydrolase activity;hydrolase activity, acting on ester bonds;nuclease activity;nucleic acid binding			+	1.60263	-0.883232	+	4.25171	-0.472956	+	2.29548	-1.13783
Q2G036	clpP	ATP-dependent Clp protease proteolytic subunit	6.60853	6.53908	6.72181	6.7356	6.6561	6.59879	6.92428	6.88705	6.87332	6.74819	6.78817	6.716	6.98318	6.92117	6.95617	6.83885	6.85612	6.82217		catalytic activity;endopeptidase activity;hydrolase activity;peptidase activity;peptidase activity, acting on L-amino acid peptides;serine hydrolase activity;serine-type endopeptidase activity;serine-type peptidase activity	cell part;cytoplasm;intracellular part	Cell cycle - Caulobacter				+	2.29548	-0.478684	+	2.30065	-0.380214
Q2G035	SAOUHSC_00792	Epimerase family protein SAOUHSC_00792	0	0	0	0	0	0	0	0	0	0	0	0	0	0	0	0	0	0
Q2G033	SAOUHSC_00794	Glycolytic operon regulator	7.80003	7.78888	7.77452	7.55267	7.74896	7.36736	7.94841	7.87852	7.91381	7.88986	7.86982	7.93752	7.92531	7.94841	7.90417	7.85612	7.86094	7.86213		binding;carbohydrate binding									+	2.16569	-0.22003
Q2G032	SAOUHSC_00795	Glyceraldehyde-3-phosphate dehydrogenase	0	0	0	0	0	0	6.51587	0	6.59439	0	0	0	0	0	6.3962	6.21219	0	0
Q2G031	pgk	Phosphoglycerate kinase	7.58433	7.53403	7.53908	7.69723	7.49415	0	7.53403	7.56348	7.57287	7.52244	7.50786	7.49693	7.56585	7.57864	7.54531	7.27875	7.16435	7.18469	alcohol catabolic process;alcohol metabolic process;carbohydrate catabolic process;carbohydrate metabolic process;catabolic process;cellular carbohydrate catabolic process;cellular carbohydrate metabolic process;cellular metabolic process;cellular process;generation of precursor metabolites and energy;glucose catabolic process;glucose metabolic process;glycolysis;hexose catabolic process;hexose m…	adenyl nucleotide binding;adenyl ribonucleotide binding;ATP binding;binding;catalytic activity;kinase activity;nucleotide binding;phosphoglycerate kinase activity;phosphotransferase activity, carboxyl group as acceptor;purine nucleotide binding;purine ribonucleoside triphosphate binding;purine ribonucleotide binding;ribonucleotide binding;transferase activity;transferase activity, transferring ph…	cell part;cytoplasm;intracellular part	Carbon fixation in photosynthetic organisms;Glycolysis / Gluconeogenesis				+	1.58318	-0.15851	+	3.19658	-1.17596
Q2G030	tpiA	Triosephosphate isomerase	7.39093	7.09691	7.28556	0	0	0	7.36922	7.37475	7.4609	7.15534	7.55751	7.4624	8.27184	8.35984	8.04922	8.28556	8.22011	8.1038	alcohol biosynthetic process;alcohol catabolic process;alcohol metabolic process;biosynthetic process;carbohydrate biosynthetic process;carbohydrate catabolic process;carbohydrate metabolic process;catabolic process;cellular biosynthetic process;cellular carbohydrate biosynthetic process;cellular carbohydrate catabolic process;cellular carbohydrate metabolic process;cellular metabolic process;cel…	catalytic activity;intramolecular oxidoreductase activity;intramolecular oxidoreductase activity, interconverting aldoses and ketoses;isomerase activity;triose-phosphate isomerase activity	cell part;cytoplasm;intracellular part	Carbon fixation in photosynthetic organisms;Fructose and mannose metabolism;Glycolysis / Gluconeogenesis;Inositol phosphate metabolism	+	1.34802	-1.68256
Q2G029	gpmI	2,3-bisphosphoglycerate-independent phosphoglycerate mutase	0	0	0	0	0	0	0	0	6.72918	0	0	0	0	0	0	0	0	0
Q2G028	eno	Enolase	0	0	0	0	0	0	0	0	0	0	0	0	0	0	6.45939	0	0	0
Q2G027	SAOUHSC_00800	Uncharacterized protein	6.549	6.75435	6.84942	0	6.83442	6.88024	6.86864	6.85733	6.76938	6.92065	6.74429	6.80956	6.72591	6.86153	6.80209	6.67117	6.85673	6.80414
Q2G026	SAOUHSC_00801	Protein translocase subunit SecG	8.61595	8.6149	8.62428	8.55145	8.56937	8.56467	8.66558	8.69197	8.65897	8.55991	8.617	8.5977	8.54158	8.58092	8.57054	8.5302	8.52763	8.49276	cellular process;establishment of localization;establishment of localization in cell;establishment of protein localization;protein secretion;protein transport;secretion;secretion by cell;transport	active transmembrane transporter activity;macromolecule transmembrane transporter activity;P-P-bond-hydrolysis-driven protein transmembrane transporter activity;P-P-bond-hydrolysis-driven transmembrane transporter activity;primary active transmembrane transporter activity;protein transmembrane transporter activity;protein transporter activity;substrate-specific transmembrane transporter activity;…	cell part;integral to membrane;intrinsic to membrane;membrane;membrane part;plasma membrane	Bacterial secretion system;Protein export	+	3.11453	-0.187843	+	1.83589	-0.267867	+	1.31848	-0.157745
Q2G025	SAOUHSC_00802	Carboxylesterase, putative	6.74608	0	0	0	0	0	0	0	0	0	0	0	6.47567	0	0	0	0	0
Q2G024	rnr	Ribonuclease R	8.60853	8.5092	8.5302	7.97267	8.08279	7.94349	8.33846	8.31175	8.19866	7.96802	7.97497	7.99432	7.69461	7.76118	7.80482	7.96567	7.91381	7.96802		3'-5' exonuclease activity;binding;catalytic activity;exonuclease activity;exonuclease activity, active with either ribo- or deoxyribonucleic acids and producing 5'-phosphomonoesters;exoribonuclease activity;exoribonuclease activity, producing 5'-phosphomonoesters;exoribonuclease II activity;hydrolase activity;hydrolase activity, acting on ester bonds;nuclease activity;nucleic acid binding;ribonu…	cell part;cytoplasm;intracellular part	RNA degradation	+	3.34113	-1.82593	+	2.65326	-1.00938	+	2.22865	0.649879
Q2G023	smpB	SsrA-binding protein	8.38021	8.13988	8.15229	0	0	0	8.00432	7.88196	7.83315	0	0	0	7.38561	7.32428	7.52634	0	0	0		binding;nucleic acid binding;RNA binding	cell part;cytoplasm;intracellular part		+	2.95797	-5.22879	+	2.79103	-4.9051	+	3.11388	-3.35684
Q2G021	SAOUHSC_00806	Uncharacterized protein	8.94448	8.87099	8.89927	7.4624	7.65418	7.57749	8.70329	8.65801	8.61595	7.87157	7.94002	7.95231	8.07188	8.05308	8.09342	8.04139	7.91855	7.99034					+	4.63241	-4.45214	+	4.49488	-2.45087	+	1.12111	-0.296865
Q2G019	SAOUHSC_00808	DUF5067 domain-containing protein	8.41664	8.55267	8.40993	8.7185	8.73239	8.70757	7.99826	7.94743	8.04532	7.65128	7.70842	7.69108	7.69636	7.82737	7.80618	7.63649	7.549	7.5563					+	2.27919	0.862843	+	3.16674	-1.04113	+	1.7828	-0.651222
Q2G016	SAOUHSC_00811	N-acetyltransferase domain-containing protein	0	0	0	0	0	0	0	0	0	0	0	0	6.08636	0	6.06446	0	0	0
Q2G015	clfA	Clumping factor A	9.33244	9.33445	9.36173	9.25527	9.23553	9.19033	8.99432	9.03342	9.01284	8.9196	8.88818	8.92169	8.7348	8.86806	8.82217	8.80754	8.78604	8.84323	biological adhesion;cell adhesion;cellular process;multi-organism process;pathogenesis		cell part;cell wall;external encapsulating structure;extracellular region;membrane	Staphylococcus aureus infection	+	2.24718	-0.384776	+	2.56983	-0.344496
Q2G012	emp	Extracellular matrix protein-binding protein emp	8.6053	8.65418	8.65321	8.51054	8.5092	8.6149	8.59106	8.62634	8.55388	8.58206	8.62221	8.62325	8.44091	8.3927	8.5092	8.39093	8.39967	8.3927
Q2G010	SAOUHSC_00818	Micrococcal nuclease	6.99344	6.93601	7.04532	0	0	0	6.81889	6.91487	6.83696	7.02938	6.87622	6.96095	6.78319	6.83696	6.81954	0	0	6.85974		binding;catalytic activity;hydrolase activity;hydrolase activity, acting on ester bonds;nuclease activity;nucleic acid binding			+	1.55408	-0.967513
Q2G009	SAOUHSC_00819	Cold shock protein CspA	7.27184	7.38561	7.38021	6.88649	7.13354	7.16137	7.02119	7.0607	7.11059	7.4843	7.48572	7.46982	6.88081	7.10037	7.00432	7.25527	7.22789	7.32428	biological regulation;regulation of biological process;regulation of biosynthetic process;regulation of cellular biosynthetic process;regulation of cellular macromolecule biosynthetic process;regulation of cellular metabolic process;regulation of cellular process;regulation of gene expression;regulation of macromolecule biosynthetic process;regulation of macromolecule metabolic process;regulation…	binding;DNA binding;nucleic acid binding	cell part;cytoplasm;intracellular part		+	1.40193	-0.948146	+	4.02513	1.38122	+	1.76687	0.910137
Q2G008	SAOUHSC_00820	Uncharacterized protein	8.30535	8.28556	8.32634	8.11727	8.0607	8.1959	8.25768	8.26007	8.25285	8.14922	8.15836	8.17319	8.12385	8.1959	8.18752	8.01703	7.9619	7.92993					+	1.94059	-0.601685	+	3.7253	-0.320937	+	2.3693	-0.662629
Q2G006	SAOUHSC_00822	Uncharacterized protein	8.33646	8.2014	8.27646	7.87795	8.0569	7.89927	8.32838	8.30535	8.21219	8.10037	8.16732	8.17609	8.12057	8.19312	8.07555	8.17026	8.16137	8.2014					+	2.05039	-1.08538	+	1.45385	-0.445293
Q2G002	aroD	3-dehydroquinate dehydratase	6.73957	6.7574	6.7007	0	0	0	6.84323	6.72754	6.69723	6.63347	6.6902	6.61278	6.62221	6.43775	6.5832	6.53529	6.52892	6.63448
Q2G001	SAOUHSC_00833	Nitroreductase domain-containing protein	7.22789	7.32015	7.25768	0	7.46389	7.52634	7.32222	7.23805	7.19866	7.36361	7.45637	7.48287	7.02531	7.08636	7.12385	7.36173	7.40654	7.44091		catalytic activity;oxidoreductase activity						+	1.6164	0.602297	+	3.04243	1.07814
Q2G000	SAOUHSC_00834	Thioredoxin, putative	7.11394	7.38202	7.35218	7.58771	7.57171	7.6149	7.2878	7.31387	7.1959	7.46982	7.4843	7.3927	7.20412	7.23553	7.27646	7.63749	7.6464	7.56585	biological regulation;cell redox homeostasis;cellular homeostasis;cellular process;glycerol ether metabolic process;homeostatic process;metabolic process;organic ether metabolic process;regulation of biological process;regulation of biological quality;regulation of cellular process;small molecule metabolic process	catalytic activity;disulfide oxidoreductase activity;oxidoreductase activity;oxidoreductase activity, acting on a sulfur group of donors;protein disulfide oxidoreductase activity			+	1.64289	1.02556	+	1.79464	0.608191	+	3.47919	1.25528
Q2FZZ9	SAOUHSC_00835	Uncharacterized protein	9.40312	9.25527	9.33244	8.0899	8.12385	8.32222	9.07918	9.09342	8.99211	8.04532	8.00432	8.03342	8.57978	8.60746	8.60746	8.00432	7.96755	8.03342					+	3.78338	-3.82559	+	5.14952	-3.41234	+	5.02459	-1.98142
Q2FZZ8	gcvH	Glycine cleavage system H protein	8.81558	8.68574	8.76641	7.69461	7.67302	7.94694	8.38739	8.40993	8.36736	7.69984	7.71096	7.78533	7.99034	8.06446	7.98989	8.04922	7.98227	7.95713	amine catabolic process;amine metabolic process;carboxylic acid catabolic process;carboxylic acid metabolic process;catabolic process;cellular amine metabolic process;cellular amino acid catabolic process;cellular amino acid metabolic process;cellular catabolic process;cellular ketone metabolic process;cellular macromolecule metabolic process;cellular metabolic process;cellular nitrogen compound …		cell part;cytoplasmic part;glycine cleavage complex;intracellular part;macromolecular complex;protein complex		+	3.29722	-3.27007	+	4.61534	-2.17979
Q2FZZ3	SAOUHSC_00841	Thioredoxin domain-containing protein	7.67943	7.78247	7.83378	7.57634	7.69897	7.43457	7.73719	7.76567	7.67394	7.70586	7.7356	7.76418	7.72997	7.75128	7.65706	7.66464	7.68305	7.71684
Q2FZZ2	metN2	Methionine import ATP-binding protein MetN 2	0	6.15229	6.19312	0	0	0	0	0	5.98719	6.07555	6.08279	6.03743	0	0	0	0	0	0
Q2FZZ0	SAOUHSC_00844	Lipoprotein	6.51983	6.43616	6.51587	0	0	0	6.55145	6.53529	6.4014	0	6.74773	6.66558	0	0	0	0	0	0
Q2FZY9	SAOUHSC_00845	UPF0337 protein SAOUHSC_00845	0	0	5.7291	0	0	0	0	0	0	0	0	0	0	0	0	0	0	0
Q2FZY7	SAOUHSC_00847	ABC transporter, ATP-binding protein, putative	0	6.98767	7.01703	0	0	0	7.07918	7.07188	6.96237	7.07555	7.15836	7.06446	6.99388	6.97818	6.9425	6.98091	7.08279	7.07188
Q2FZY6	SAOUHSC_00848	Uncharacterized protein	7.38021	7.31175	7.26245	0	0	0	6.98453	7.04532	6.86629	7.09691	7.12057	7.17026	7.02531	6.96379	6.97909	7.04532	7.02119	7.02119	biosynthetic process;cellular biosynthetic process;cellular metabolic process;cellular process;cofactor biosynthetic process;cofactor metabolic process;iron-sulfur cluster assembly;metabolic process;metallo-sulfur cluster assembly				+	1.43519	-1.96154	+	1.34812	0.544362
Q2FZY5	SAOUHSC_00849	Probable cysteine desulfurase	8.21748	8.16732	8.17319	7.81491	7.93702	8.10721	0	8.10721	8.0899	7.88874	7.95713	8.03743	0	7.96567	8.02119	7.92788	7.89597	7.9284	amine metabolic process;carboxylic acid metabolic process;cellular amine metabolic process;cellular amino acid metabolic process;cellular ketone metabolic process;cellular metabolic process;cellular nitrogen compound metabolic process;cellular process;cysteine metabolic process;metabolic process;nitrogen compound metabolic process;organic acid metabolic process;oxoacid metabolic process;primary m…	binding;catalytic activity;cofactor binding;cysteine desulfurase activity;pyridoxal phosphate binding;sulfurtransferase activity;transaminase activity;transferase activity;transferase activity, transferring nitrogenous groups;transferase activity, transferring sulfur-containing groups;vitamin B6 binding;vitamin binding		Selenocompound metabolism;Thiamine metabolism	+	1.26759	-0.773842
Q2FZY4	SAOUHSC_00850	NifU_N domain-containing protein	7.74741	7.87332	7.86864	6.81425	7.14922	7.02119	8.03342	7.89708	8.07918	7.58206	7.69285	7.61172	7.92065	7.87274	8.01284	7.72835	7.70157	7.7679	biosynthetic process;cellular biosynthetic process;cellular metabolic process;cellular process;cofactor biosynthetic process;cofactor metabolic process;iron-sulfur cluster assembly;metabolic process;metallo-sulfur cluster assembly	binding;cation binding;ion binding;iron ion binding;iron-sulfur cluster binding;metal cluster binding;metal ion binding;transition metal ion binding			+	2.8535	-2.7735	+	2.37205	-1.24356	+	1.95462	-0.673689
Q2FZY3	SAOUHSC_00851	UPF0051 protein SAOUHSC_00851	0	6.78319	6.76716	0	6.82581	0	6.83759	6.9196	6.77452	6.78817	6.78746	6.79449	6.6981	6.83187	6.77887	6.82151	6.80277	6.75511
Q2FZX9	SAOUHSC_00855	Probable nitronate monooxygenase	7.43457	7.50786	7.46687	0	7.17017	0	7.20683	7.17898	7.09342	7.1271	7.13033	7.18469	7.10721	7.13354	7.1271	7.1271	7.24797	7.24797		catalytic activity;monooxygenase activity;nitronate monooxygenase activity;oxidoreductase activity;oxidoreductase activity, acting on single donors with incorporation of molecular oxygen;oxidoreductase activity, acting on single donors with incorporation of molecular oxygen, incorporation of one atom of oxygen (internal monooxygenases or internal mixed function oxidases)		Nitrogen metabolism	+	1.43847	-2.55719
Q2FZX7	SAOUHSC_00858	Uncharacterized protein	6.97864	0	7.12057	0	0	0	7.38202	7.33244	7.27646	6.93902	7.01284	6.9619	7.43297	7.41996	7.49693	7.04532	6.98856	6.95376								+	3.1777	-1.19275	+	3.65509	-1.50839
Q2FZX4	lipA	Lipoyl synthase	7.13354	0	7.09342	0	0	0	7.07188	7.02531	7.01284	0	0	0	6.96379	7.09691	6.98989	0	0	0	cellular macromolecule metabolic process;cellular metabolic process;cellular process;cellular protein metabolic process;macromolecule metabolic process;macromolecule modification;metabolic process;primary metabolic process;protein lipoylation;protein metabolic process;protein modification process;protein-cofactor linkage	4 iron, 4 sulfur cluster binding;binding;catalytic activity;cation binding;ion binding;iron-sulfur cluster binding;ligase activity;ligase activity, forming carbon-nitrogen bonds;lipoate synthase activity;lipoate-protein ligase activity;metal cluster binding;metal ion binding;radical SAM enzyme activity;sulfurtransferase activity;transferase activity;transferase activity, transferring sulfur-conta…	cell part;cytoplasm;intracellular part	Lipoic acid metabolism				+	2.25493	-2.03176	+	2.3184	-2.47394
Q2FZX3	SAOUHSC_00862	Uncharacterized protein	6.78746	6.90363	6.80072	0	0	0	6.97543	6.9284	6.94645	6.90309	6.86332	6.86629	6.71517	6.70672	6.82995	6.65896	6.78746	6.85673								+	1.74477	-0.240928
Q2FZX2	SAOUHSC_00863	Uncharacterized protein	7.37658	7.31806	7.32838	0	0	0	7.49276	7.43616	7.42488	7.46389	7.48572	7.52892	7.14613	7.17898	7.19312	7.33244	7.23045	7.25042					+	2.18268	-2.29444				+	1.34605	0.326743
Q2FZX1	SAOUHSC_00864	Uncharacterized protein	7.90633	7.81491	7.86864	7.47129	7.77597	7.78533	7.9952	7.90255	7.90417	7.8739	7.95424	7.94792	7.91593	7.85003	7.84572	7.82347	7.85914	7.82672
Q2FZX0	nagD	Acid sugar phosphatase	6.88986	7.13033	6.98543	0	6.80736	0	7.02531	7.02531	7.00432	7.0569	7.06446	7.15229	6.84261	6.8651	7.03743	6.9248	7.08991	6.93952
Q2FZW9	SAOUHSC_00866	D-isomer specific 2-hydroxyacid dehydrogenase, NAD binding domain protein	0	0	6.41946	0	0	0	6.35793	6.42651	6.39093	0	6.47841	6.47422	6.46687	6.42488	6.52504	0	0	0		binding;catalytic activity;coenzyme binding;cofactor binding;NAD binding;nucleotide binding;oxidoreductase activity;oxidoreductase activity, acting on CH-OH group of donors;oxidoreductase activity, acting on the CH-OH group of donors, NAD or NADP as acceptor			+	1.47235	1.12364
Q2FZW6	dltA	D-alanine--D-alanyl carrier protein ligase	6.91381	6.76118	6.8893	0	6.46222	0	7.04532	6.97267	0	0	7.01708	0	0	0	6.95279	6.89873	6.68574	6.80889
Q2FZW5	SAOUHSC_00870	Teichoic acid D-alanyltransferase	0	8.64542	8.60206	9.08279	8.77085	0	9.0569	9.18469	9.18752	9.34044	9.50379	9.3483	9	8.80956	8.82543	9.03743	9.11394	8.97174				Staphylococcus aureus infection				+	1.68807	0.845346	+	1.03897	0.540504
Q2FZW4	dltC	D-alanyl carrier protein	0	9.10037	9.10037	0	9.05212	0	9.83759	9.99123	9.93551	9.70501	10.0253	9.83759	9.95809	9.61384	9.76567	9.90417	9.95761	9.6721
Q2FZW3	dltD	Protein DltD	0	0	0	0	0	0	0	0	0	0	0	0	0	5.78888	0	0	0	0
Q2FZW2	SAOUHSC_00873	NifU domain-containing protein	7.21219	7.26951	7.10721	0	0	7.26689	7.13672	7.08636	7.04922	6.98046	7	6.94448	7	6.9284	7.06446	6.48001	0	0	biosynthetic process;cellular biosynthetic process;cellular metabolic process;cellular process;cofactor biosynthetic process;cofactor metabolic process;iron-sulfur cluster assembly;metabolic process;metallo-sulfur cluster assembly	binding;cation binding;ion binding;iron ion binding;iron-sulfur cluster binding;metal cluster binding;metal ion binding;transition metal ion binding						+	1.73529	-0.384633	+	3.2418	-1.95476
Q2FZW1	SAOUHSC_00874	Uncharacterized protein	7.19312	7.34242	7.34242	7.29447	7.27416	7.17898	7.48001	7.43775	7.43457	7.29667	7.28556	7.23805	7.42813	7.4133	7.55023	7.18752	7.10037	7.26951								+	2.80418	-0.589153	+	1.88331	-0.923783
Q2FZW0	SAOUHSC_00875	Pyr_redox_2 domain-containing protein	0	0	0	0	0	0	0	6.03133	0	0	6.06521	6.1271	5.85003	6.08991	0	0	0	0
Q2FZV9	SAOUHSC_00876	UPF0349 protein SAOUHSC_00876	0	0	0	0	0	0	0	0	5.44616	0	0	0	0	0	0	0	0	0
Q2FZV8	SAOUHSC_00877	Fe-S_biosyn domain-containing protein	8.12057	8.13988	8.12385	7.8014	8.10037	7.9196	8.31597	8.28103	8.23553	8.13672	8.20412	8.19312	8.02531	8.04532	7.98408	8.04922	8.04922	8.06819	biosynthetic process;cellular biosynthetic process;cellular metabolic process;cellular process;cofactor biosynthetic process;cofactor metabolic process;iron-sulfur cluster assembly;metabolic process;metallo-sulfur cluster assembly	binding;iron-sulfur cluster binding;metal cluster binding;structural molecule activity						+	1.47537	-0.330606
Q2FZV7	SAOUHSC_00878	NADH dehydrogenase-like protein SAOUHSC_00878	7.98989	8.01284	7.93752	8.25285	8.23805	7.68842	8.23045	8.26482	8.35411	8.22531	8.30535	8.3075	8.72591	8.74194	8.56937	8.97727	9.0086	8.99564		binding;catalytic activity;coenzyme binding;cofactor binding;flavin adenine dinucleotide binding;oxidoreductase activity		Oxidative phosphorylation							+	2.31341	1.04561
Q2FZV6	SAOUHSC_00879	Probable cytosol aminopeptidase	7.02938	6.98989	6.94645	0	6.79979	0	0	0	0	0	6.73975	6.81624	0	0	0	0	0	0		aminopeptidase activity;binding;catalytic activity;cation binding;exopeptidase activity;hydrolase activity;ion binding;manganese ion binding;metal ion binding;metalloexopeptidase activity;metallopeptidase activity;peptidase activity;peptidase activity, acting on L-amino acid peptides;transition metal ion binding	cell part;cytoplasm;intracellular part	Glutathione metabolism	+	1.54701	-0.746991
Q2FZV1	mnhA1	Na(+)/H(+) antiporter subunit A1	8.36922	8.70329	8.61384	9.24055	9.26245	8.98632	9.22789	9.21484	9.25768	9.29226	9.29667	9.1959	9.41996	9.35218	9.36361	9.49831	9.51188	9.53403	ATP synthesis coupled electron transport;biological regulation;cation homeostasis;cation transport;cellular cation homeostasis;cellular chemical homeostasis;cellular homeostasis;cellular ion homeostasis;cellular metabolic process;cellular monovalent inorganic cation homeostasis;cellular process;chemical homeostasis;electron transport chain;establishment of localization;generation of precursor met…	active transmembrane transporter activity;antiporter activity;catalytic activity;cation transmembrane transporter activity;inorganic cation transmembrane transporter activity;ion transmembrane transporter activity;monovalent inorganic cation transmembrane transporter activity;NADH dehydrogenase (quinone) activity;NADH dehydrogenase (ubiquinone) activity;NADH dehydrogenase activity;oxidoreductase …	cell part;integral to membrane;intrinsic to membrane;membrane;membrane part;plasma membrane		+	1.96626	1.99645				+	2.36276	0.452302
Q2FZV0	SAOUHSC_00890	Uncharacterized protein	0	6.08636	6.26951	0	0	0	6.26126	0	0	6.24546	0	6.35603	0	0	0	0	0	0
Q2FZU9	SAOUHSC_00891	Putative peptidyl-prolyl cis-trans isomerase	0	0	6.54893	0	0	0	6.52634	6.50786	6.50786	0	0	6.35025	0	6.32634	6.32428	6.35603	6.5611	6.48855	cellular macromolecule metabolic process;cellular metabolic process;cellular process;cellular protein metabolic process;macromolecule metabolic process;metabolic process;primary metabolic process;protein folding;protein metabolic process	catalytic activity;cis-trans isomerase activity;isomerase activity;peptidyl-prolyl cis-trans isomerase activity									+	1.20578	0.530759
Q2FZU8	SAOUHSC_00892	S1 motif domain-containing protein	0	6.36549	6.52892	0	0	0	6.55986	0	0	6.26007	6.50786	0	0	0	0	0	0	0
Q2FZU7	SAOUHSC_00893	FMN oxidoreductase, putative	7.08991	7.08279	7.11059	0	7.10037	7.27875	7.12385	7.14301	7.12057	7.11394	7.19033	7.1271	6.95999	6.88138	6.90687	6.94988	6.92273	6.97864
Q2FZU6	rocD	Ornithine aminotransferase	9.23805	9.27416	9.19312	9.46835	9.4014	9.08636	9.21484	9.23553	9.26717	8.91593	8.93349	8.94792	8.943	8.83187	9.06446	8.52763	8.49831	8.60746	amine biosynthetic process;amine metabolic process;arginine metabolic process;biosynthetic process;carboxylic acid biosynthetic process;carboxylic acid metabolic process;cellular amine metabolic process;cellular amino acid biosynthetic process;cellular amino acid metabolic process;cellular biosynthetic process;cellular ketone metabolic process;cellular metabolic process;cellular nitrogen compound…	binding;catalytic activity;cofactor binding;ornithine-oxo-acid transaminase activity;pyridoxal phosphate binding;transaminase activity;transferase activity;transferase activity, transferring nitrogenous groups;vitamin B6 binding;vitamin binding	cell part;cytoplasm;intracellular part	Arginine and proline metabolism				+	4.17618	-1.01895	+	2.24005	-1.33534
Q2FZU5	SAOUHSC_00895	Glutamate dehydrogenase	0	0	0	0	0	0	0	0	0	0	0	0	0	0	0	6.92169	0	0
Q2FZU3	SAOUHSC_00897	GP-PDE domain-containing protein	7.74272	7.76193	7.7007	7.70757	7.63043	8.00432	7.0569	7.10721	7.21748	0	0	0	0	7.14301	0	0	0	0
Q2FZU2	argH	Argininosuccinate lyase	0	0	6.57131	0	0	6.8413	6.66839	6.56229	6.57287	6.59988	6.78176	0	6.57634	6.53529	6.48855	6.5966	0	6.71933
Q2FZU1	argG	Argininosuccinate synthase	6.8109	6.89432	0	0	0	0	0	0	0	0	0	0	0	0	0	0	0	0
Q2FZU0	pgi	Glucose-6-phosphate isomerase	6.61172	0	6.69461	0	0	0	6.66032	0	0	0	0	0	0	0	0	0	0	0
Q2FZT8	SAOUHSC_00902	Signal peptidase I	7.86094	7.85733	7.91434	8.06446	7.94792	8.11394	8.03743	8.00432	8.01703	7.88024	7.84572	7.84572	8.02119	7.89653	7.99211	7.87622	7.82995	7.88986		catalytic activity;hydrolase activity;peptidase activity;peptidase activity, acting on L-amino acid peptides;serine hydrolase activity;serine-type peptidase activity	cell part;integral to membrane;intrinsic to membrane;membrane part	Protein export	+	1.45436	0.546693	+	3.3823	-0.539373	+	1.17674	-0.347475
Q2FZT7	SAOUHSC_00903	Signal peptidase I	0	6.10718	0	0	0	0	0	0	0	0	0	0	0	0	0	0	0	0
Q2FZT6	addB	ATP-dependent helicase/deoxyribonuclease subunit B	8.62839	8.734	8.86094	8.61384	8.63849	8.78675	8.23805	8.32428	8.32015	8.48287	8.53656	8.58995	7.81757	7.87099	7.84011	8.25527	8.26717	8.26717	cellular macromolecule metabolic process;cellular metabolic process;cellular nitrogen compound metabolic process;cellular process;cellular response to stimulus;cellular response to stress;DNA metabolic process;DNA recombination;DNA repair;double-strand break repair;double-strand break repair via homologous recombination;macromolecule metabolic process;metabolic process;nitrogen compound metabolic…	4 iron, 4 sulfur cluster binding;5'-3' exonuclease activity;adenyl nucleotide binding;adenyl ribonucleotide binding;ATP binding;binding;catalytic activity;cation binding;DNA binding;double-stranded DNA binding;exonuclease activity;helicase activity;hydrolase activity;hydrolase activity, acting on acid anhydrides;hydrolase activity, acting on acid anhydrides, in phosphorus-containing anhydrides;hy…						+	2.35764	0.804911	+	4.90556	1.39627
Q2FZT5	addA	ATP-dependent helicase/nuclease subunit A	7.77452	7.75128	7.73239	7.77452	7.70842	7.72016	7.72346	7.72997	7.72099	7.77379	7.78176	7.77012	7.60959	7.59988	7.60206	7.6149	7.54654	7.63246	cellular macromolecule metabolic process;cellular metabolic process;cellular nitrogen compound metabolic process;cellular process;cellular response to stimulus;cellular response to stress;DNA metabolic process;DNA recombination;DNA repair;double-strand break repair;double-strand break repair via homologous recombination;macromolecule metabolic process;metabolic process;nitrogen compound metabolic…	3'-5' exonuclease activity;adenyl nucleotide binding;adenyl ribonucleotide binding;ATP binding;ATPase activity;ATPase activity, coupled;ATP-dependent DNA helicase activity;ATP-dependent helicase activity;binding;catalytic activity;DNA binding;DNA helicase activity;DNA-dependent ATPase activity;double-stranded DNA binding;exonuclease activity;helicase activity;hydrolase activity;hydrolase activity…						+	3.49621	0.16747
Q2FZT4	SAOUHSC_00906	Uncharacterized protein SAOUHSC_00906	8.63749	8.84261	8.77379	8.88081	8.8055	8.80346	8.50106	8.47567	8.53908	8.39093	8.35025	8.34439	8.13672	8.22789	8.38202	7.80277	7.79727	7.78746		binding;catalytic activity;cation binding;ion binding;metal ion binding						+	2.43587	-0.4764	+	2.49303	-1.50497
Q2FZT1	SAOUHSC_00909	Uncharacterized protein	9.16732	9.24055	9.25285	9.12057	9.08636	9.13988	8.94743	9.01284	8.98543	9.1038	9.06819	9.06819	8.99255	9.13988	9.35603	8.71433	8.68395	8.66932		catalytic activity;hydrolase activity			+	1.55666	-0.347591	+	1.9279	0.326079	+	1.9497	-1.57334
Q2FZT0	SAOUHSC_00910	FeS_assembly_P domain-containing protein	7.72754	7.86688	7.84942	7.86806	8.05308	8.18469	7.62118	7.63246	7.65418	7.84261	7.82995	7.83822	7.35411	7.40654	7.65896	7.57864	7.72016	7.77597								+	4.37891	0.667668
Q2FZS9	SAOUHSC_00911	Acyl_transf_3 domain-containing protein	6.90255	6.8848	6.89982	0	0	0	6.91645	6.97909	6.94694	0	0	6.88649	6.82737	0	6.85914	0	0	0
Q2FZS8	clpB	Chaperone protein ClpB	0	6.13354	6.03743	0	0	0	0	0	0	0	6.25273	6.11727	0	0	0	0	0	0
Q2FZS3	SAOUHSC_00917	Uncharacterized protein	7.44248	7.41996	7.47567	0	7.34044	7.35793	7.52634	7.53908	7.47129	7.48001	7.45484	7.48287	7.11727	7.17319	7.13672	7.31597	7.21748	7.17609
Q2FZS2	SAOUHSC_00918	Truncated MHC class II analog protein	8.52244	8.32015	8.42975	0	0	0	8.15836	8.18469	8.18184	0	0	0	7.71517	7.60746	7.67761	7.11727	0	0					+	2.94096	-6.02877	+	2.72351	-5.6767	+	1.66658	-3.98983
Q2FZS0	fabH	3-oxoacyl-[acyl-carrier-protein] synthase 3	7.0607	7	7.0569	0	0	0	7.21484	6.99344	0	7.02486	0	7.18752	7.31175	7.24797	7.3927	7.26482	7.10721	7.07188	biosynthetic process;carboxylic acid biosynthetic process;carboxylic acid metabolic process;cellular biosynthetic process;cellular ketone metabolic process;cellular lipid metabolic process;cellular metabolic process;cellular process;fatty acid biosynthetic process;fatty acid metabolic process;lipid biosynthetic process;lipid metabolic process;metabolic process;monocarboxylic acid metabolic proces…	3-oxoacyl-[acyl-carrier-protein] synthase activity;beta-ketoacyl-acyl-carrier-protein synthase III activity;catalytic activity;fatty acid synthase activity;transferase activity;transferase activity, transferring acyl groups;transferase activity, transferring acyl groups other than amino-acyl groups	cell part;cytoplasm;intracellular part	Fatty acid biosynthesis	+	4.78883	-2.09314				+	1.09779	-0.563083
Q2FZR9	SAOUHSC_00921	3-oxoacyl-[acyl-carrier-protein] synthase 2	8.79865	8.80754	8.85552	8.57978	8.60746	8.43933	8.91116	8.84696	8.88366	8.71684	8.73957	8.75051	9.08636	9.05308	9.15534	8.71349	8.75587	8.72835	biosynthetic process;carboxylic acid biosynthetic process;carboxylic acid metabolic process;cellular biosynthetic process;cellular ketone metabolic process;cellular lipid metabolic process;cellular metabolic process;cellular process;fatty acid biosynthetic process;fatty acid metabolic process;lipid biosynthetic process;lipid metabolic process;metabolic process;monocarboxylic acid metabolic proces…	beta-ketoacyl-acyl-carrier-protein synthase II activity;catalytic activity;transferase activity;transferase activity, transferring acyl groups;transferase activity, transferring acyl groups other than amino-acyl groups		Fatty acid biosynthesis	+	2.14537	-0.924751	+	2.63047	-0.48152	+	3.44553	-1.21478
Q2FZR6	SAOUHSC_00924	ABC transmembrane type-1 domain-containing protein	7.17898	7.233	7.24551	0	0	0	7.4183	7.42975	7.35025	0	0	0	7.51054	7.38202	7.54654	7.14922	7.13033	0	establishment of localization;transport		cell part;integral to membrane;intrinsic to membrane;membrane;membrane part;plasma membrane	ABC transporters	+	1.44202	-2.53366	+	3.91933	-3.36493	+	1.28666	-1.74148
Q2FZR4	SAOUHSC_00926	Oligopeptide ABC transporter, ATP-binding protein, putative	7.27416	7.26245	7.3075	7.33646	7.34242	7.36922	7.43297	7.38561	7.43616	7.37291	7.35603	7.3927	7.35025	7.42488	7.40312	7.37658	7.34044	7.49136	establishment of localization;peptide transport;transport	adenyl nucleotide binding;adenyl ribonucleotide binding;ATP binding;ATPase activity;binding;catalytic activity;hydrolase activity;hydrolase activity, acting on acid anhydrides;hydrolase activity, acting on acid anhydrides, in phosphorus-containing anhydrides;nucleoside-triphosphatase activity;nucleotide binding;purine nucleotide binding;purine ribonucleoside triphosphate binding;purine ribonucleo…		ABC transporters	+	1.80608	0.225884
Q2FZR3	SAOUHSC_00927	Oligopeptide ABC transporter, substrate-binding protein, putative	7.42813	7.61595	7.39794	7.6464	7.53656	7.24304	7.34044	7.34635	7.38202	7.04922	6.95809	7.08991	7.30963	7.34635	7.2878	7.04532	7.16435	7.21219	cellular process;establishment of localization;transmembrane transport;transport		ATP-binding cassette (ABC) transporter complex;cell part;macromolecular complex;membrane part;protein complex	ABC transporters				+	2.85412	-1.07587	+	1.53025	-0.577929
Q2FZQ7	trpS	Tryptophan--tRNA ligase	6.87256	0	0	0	0	0	0	0	0	0	0	0	0	0	0	0	0	0
Q2FZQ5	SAOUHSC_00945	Magnesium transporter MgtE	7.3927	7.27646	7.31597	7.42651	7.58883	7.68931	7.49831	7.46835	7.51587	7.65896	7.6721	7.67761	7.60638	7.65418	7.60531	7.67486	7.66087	7.69197		binding;cation binding;cation transmembrane transporter activity;divalent inorganic cation transmembrane transporter activity;inorganic cation transmembrane transporter activity;ion binding;ion transmembrane transporter activity;magnesium ion transmembrane transporter activity;metal ion binding;metal ion transmembrane transporter activity;substrate-specific transmembrane transporter activity;subs…	cell part;integral to membrane;intrinsic to membrane;membrane;membrane part;plasma membrane		+	1.33851	0.796734	+	3.52157	0.582598	+	1.36546	0.179194
Q2FZQ4	SAOUHSC_00946	Uncharacterized protein	8.41664	8.4456	8.50106	8.28103	8.36549	8.29226	8.60097	8.5977	8.61384	8.40993	8.39794	8.38021	8.54033	8.49415	8.54407	8.38021	8.35984	8.39093	cation transport;establishment of localization;ion transport;metal ion transport;monovalent inorganic cation transport;potassium ion transport;transport	active transmembrane transporter activity;antiporter activity;cation transmembrane transporter activity;hydrogen ion transmembrane transporter activity;inorganic cation transmembrane transporter activity;ion transmembrane transporter activity;monovalent inorganic cation transmembrane transporter activity;secondary active transmembrane transporter activity;solute:cation antiporter activity;solute:…	cell part;integral to membrane;intrinsic to membrane;membrane;membrane part;plasma membrane		+	1.75702	-0.470083	+	4.51225	-0.691432	+	2.89483	-0.495599
Q2FZQ3	fabI	Enoyl-[acyl-carrier-protein] reductase [NADPH] FabI	6.74115	6.80277	6.90741	6.75967	6.80889	0	7.38917	7.13033	7.1271	6.93197	6.76118	6.93601	7.38917	7.42975	7.48714	6.97174	6.83822	7.02938	biosynthetic process;carboxylic acid biosynthetic process;carboxylic acid metabolic process;cellular biosynthetic process;cellular component assembly;cellular component organization;cellular component organization or biogenesis;cellular ketone metabolic process;cellular lipid metabolic process;cellular metabolic process;cellular process;fatty acid biosynthetic process;fatty acid elongation;fatty …	binding;catalytic activity;coenzyme binding;cofactor binding;enoyl-[acyl-carrier-protein] reductase (NADH) activity;enoyl-[acyl-carrier-protein] reductase (NADPH, A-specific) activity;fatty acid synthase activity;NADP binding;nucleotide binding;oxidoreductase activity;oxidoreductase activity, acting on the CH-CH group of donors;oxidoreductase activity, acting on the CH-CH group of donors, NAD or …		Fatty acid biosynthesis				+	1.50539	-1.12663	+	2.81892	-1.62411
Q2FZQ2	SAOUHSC_00948	Uncharacterized protein	0	0	0	0	0	0	6.47712	6.4609	0	0	0	0	0	0	0	0	0	0
Q2FZP9	SAOUHSC_00951	Putative phosphoesterase SAOUHSC_00951	6.63849	0	6.57749	0	0	0	6.6464	6.5611	6.50786	0	0	0	6.37291	6.43297	0	0	0	0		catalytic activity;hydrolase activity;hydrolase activity, acting on ester bonds			+	1.37132	1.11733
Q2FZP7	ugtP	Processive diacylglycerol beta-glucosyltransferase	0	0	0	0	0	0	0	0	0	0	0	0	0	6.08636	0	0	0	0
Q2FZP6	murE	UDP-N-acetylmuramoyl-L-alanyl-D-glutamate--L-lysine ligase	7.47129	7.38917	7.32838	0	0	0	7.32015	7.29667	7.17319	0	0	0	7.25285	7.35411	7.19312	7.44871	7.48996	7.52244	amine metabolic process;aminoglycan biosynthetic process;aminoglycan metabolic process;biological regulation;biosynthetic process;carbohydrate biosynthetic process;carbohydrate metabolic process;cell cycle;cell division;cell wall macromolecule biosynthetic process;cell wall macromolecule metabolic process;cell wall organization;cell wall organization or biogenesis;cellular biosynthetic process;ce…	acid-amino acid ligase activity;adenyl nucleotide binding;adenyl ribonucleotide binding;ATP binding;binding;catalytic activity;ligase activity;ligase activity, forming carbon-nitrogen bonds;nucleotide binding;purine nucleotide binding;purine ribonucleoside triphosphate binding;purine ribonucleotide binding;ribonucleotide binding;UDP-N-acetylmuramoyl-L-alanyl-D-glutamate-L-lysine ligase activity	cell part;cytoplasm;intracellular part	Peptidoglycan biosynthesis	+	1.49944	-1.78326	+	2.65328	-3.17779	+	1.88772	0.731957
Q2FZP4	prfC	Peptide chain release factor 3	7.48287	7.49554	7.48996	7.49276	7.39967	0	7.1038	7.03743	7.07918	7.31597	7.29885	7.35984	6.77012	6.90956	6.75587	7.36173	7.37658	7.40993	biological regulation;posttranscriptional regulation of gene expression;regulation of biological process;regulation of biosynthetic process;regulation of cellular biosynthetic process;regulation of cellular component organization;regulation of cellular macromolecule biosynthetic process;regulation of cellular metabolic process;regulation of cellular process;regulation of cellular protein metaboli…	binding;catalytic activity;GTP binding;GTPase activity;guanyl nucleotide binding;guanyl ribonucleotide binding;hydrolase activity;hydrolase activity, acting on acid anhydrides;hydrolase activity, acting on acid anhydrides, in phosphorus-containing anhydrides;nucleic acid binding;nucleoside-triphosphatase activity;nucleotide binding;purine nucleotide binding;purine ribonucleoside triphosphate bind…	cell part;cytoplasm;intracellular part					+	3.15855	0.835185	+	3.43869	1.89648
Q2FZP3	SAOUHSC_00957	Uncharacterized protein	0	6.68931	6.67486	0	0	0	6.57965	0	0	0	0	0	0	0	0	0	0	0
Q2FZP2	SAOUHSC_00958	Serine protease HtrA-like	6.85612	6.89376	6.96802	7.14613	7.08279	7.10037	6.82086	6.82866	6.76641	6.80618	6.70415	6.83696	0	0	6.41162	6.62325	0	0		catalytic activity;endopeptidase activity;hydrolase activity;peptidase activity;peptidase activity, acting on L-amino acid peptides;serine hydrolase activity;serine-type endopeptidase activity;serine-type peptidase activity	cell part;integral to membrane;intrinsic to membrane;membrane;membrane part;plasma membrane		+	2.2378	0.676989
Q2FZP0	SAOUHSC_00960	5_nucleotid_C domain-containing protein	7.5563	7.49969	7.61384	7.20412	7.3962	7.11727	7.76567	7.71517	7.62531	7.63043	7.72997	7.60531	7.549	7.58659	7.66839	7.81823	7.83059	7.75282	catabolic process;cellular catabolic process;cellular metabolic process;cellular nitrogen compound catabolic process;cellular nitrogen compound metabolic process;cellular process;metabolic process;nitrogen compound metabolic process;nucleobase-containing compound catabolic process;nucleobase-containing compound metabolic process;nucleobase-containing small molecule metabolic process;nucleoside ph…	catalytic activity;hydrolase activity			+	1.63372	-1.05443				+	2.01962	0.661789
Q2FZN9	SAOUHSC_00961	Uncharacterized protein	7.70329	8.15534	8.23553	0	0	0	7.93095	8.01703	7.72997	0	0	0	0	0	0	0	0	0	cell communication;cellular process;cellular response to external stimulus;cellular response to extracellular stimulus;cellular response to stimulus;establishment of competence for transformation;response to external stimulus;response to extracellular stimulus;response to stimulus				+	2.46056	-4.12044	+	3.07995	-4.39359	+	1.18851	0.757009
Q2FZN8	SAOUHSC_00962	IDEAL domain-containing protein	0	0	0	0	0	0	0	6.09958	0	0	0	0	0	0	0	0	0	0
Q2FZN7	SAOUHSC_00963	Lipoate--protein ligase	6.74655	0	0	0	0	0	0	0	0	0	0	0	0	0	0	0	0	0
Q2FZN6	SAOUHSC_00964	Uncharacterized protein	0	0	6.66873	0	0	0	0	0	0	0	7.15561	7.08636	0	0	0	7.23045	7.30103	7.28103					+	1.38395	1.67408	+	1.91942	2.46433	+	2.16362	3.77378
Q2FZM8	SAOUHSC_00972	Uncharacterized protein	7.6721	7.66652	7.67302	7.49276	7.47422	7.38382	7.68034	7.66839	7.72099	7.69548	7.66839	7.64933	7.58206	7.64147	7.52375	7.54531	7.57519	7.56937					+	2.54746	-0.731759
Q2FZM5	SAOUHSC_00975	Uncharacterized protein	7.4014	7.43297	7.4456	0	0	7.31266	7.14922	7.13354	7.13988	0	0	0	7.06819	0	7.0569	7.24304	7.3032	7.26717								+	4.2698	-2.8424
Q2FZM3	SAOUHSC_00977	Uncharacterized protein	7.65031	7.76864	7.69897	7.71684	7.61805	7.71181	7.35984	7.4216	7.4456	7.28556	7.20683	7.16435	6.94645	6.99344	7.02938	7.03342	7.12385	0								+	1.9138	-0.631507
Q2FZM0	menA	1,4-dihydroxy-2-naphthoate octaprenyltransferase	0	0	0	0	0	0	0	0	5.84863	0	0	0	0	0	0	0	0	0
Q2FZL8	SAOUHSC_00982	Isochorismate synthase	7.55145	7.52114	7.61172	7.51455	7.51188	7.51587	7.4014	7.4133	7.43775	7.57519	7.60959	7.61278	8.07555	8.21484	7.90848	7.63548	7.64147	7.55991	biosynthetic process;metabolic process	catalytic activity;intramolecular transferase activity;intramolecular transferase activity, transferring hydroxy groups;isochorismate synthase activity;isomerase activity		Biosynthesis of siderophore group nonribosomal peptides;Ubiquinone and other terpenoid-quinone biosynthesis				+	3.45396	0.603611	+	2.09927	-1.50817
Q2FZL7	menD	2-succinyl-5-enolpyruvyl-6-hydroxy-3-cyclohexene-1-carboxylate synthase	7.31806	7.24797	7.30963	0	7.23167	0	7.57634	7.49693	7.4216	7.54654	7.56229	7.56585	7.92788	8.02938	7.79379	7.60206	7.45939	7.55388	biosynthetic process;cellular biosynthetic process;cellular ketone metabolic process;cellular metabolic process;cellular process;coenzyme biosynthetic process;coenzyme metabolic process;cofactor biosynthetic process;cofactor metabolic process;fat-soluble vitamin biosynthetic process;fat-soluble vitamin metabolic process;menaquinone biosynthetic process;menaquinone metabolic process;metabolic proc…	2-succinyl-5-enolpyruvyl-6-hydroxy-3-cyclohexene-1-carboxylic-acid synthase activity;binding;catalytic activity;cation binding;coenzyme binding;cofactor binding;ion binding;magnesium ion binding;manganese ion binding;metal ion binding;thiamine pyrophosphate binding;transferase activity;transferase activity, transferring aldehyde or ketonic groups;transition metal ion binding;vitamin binding		Ubiquinone and other terpenoid-quinone biosynthesis							+	2.04021	-1.2576
Q2FZL6	menH	Putative 2-succinyl-6-hydroxy-2,4-cyclohexadiene-1-carboxylate synthase	7.58995	7.40654	7.53782	7.31597	0	7.16137	7.64345	7.55388	7.47712	7.45939	7.60097	7.63043	7.97174	8.07555	7.8488	7.76118	7.80003	7.78032	biosynthetic process;cellular biosynthetic process;cellular ketone metabolic process;cellular metabolic process;cellular process;coenzyme biosynthetic process;coenzyme metabolic process;cofactor biosynthetic process;cofactor metabolic process;fat-soluble vitamin biosynthetic process;fat-soluble vitamin metabolic process;menaquinone biosynthetic process;menaquinone metabolic process;metabolic proc…	2-succinyl-6-hydroxy-2,4-cyclohexadiene-1-carboxylate synthase activity;carbon-oxygen lyase activity;catalytic activity;lyase activity		Ubiquinone and other terpenoid-quinone biosynthesis							+	1.30279	-0.614079
Q2FZL5	menB	1,4-dihydroxy-2-naphthoyl-CoA synthase	8.09342	8.04532	8.05308	0	0	7.18834	7.98543	7.95856	7.94645	7.04269	0	0	7.76418	7.78247	7.88593	7.35984	7.28556	7.28556	biosynthetic process;cellular biosynthetic process;cellular ketone metabolic process;cellular metabolic process;cellular process;coenzyme biosynthetic process;coenzyme metabolic process;cofactor biosynthetic process;cofactor metabolic process;fat-soluble vitamin biosynthetic process;fat-soluble vitamin metabolic process;menaquinone biosynthetic process;menaquinone metabolic process;metabolic proc…	1,4-dihydroxy-2-naphthoyl-CoA synthase activity;carbon-carbon lyase activity;catalytic activity;isomerase activity;lyase activity;oxo-acid-lyase activity		Ubiquinone and other terpenoid-quinone biosynthesis	+	1.90469	-4.24462	+	2.44809	-4.46582	+	3.41954	-1.66276
Q2FZL3	sspB	Staphopain B	7.11059	7.19312	7.19312	7.22531	7.08636	7.23805	7.32015	7.30535	7.30103	7.29447	7.2014	7.27875	7.32222	7.33646	7.32634	7.23553	7.29003	7.32634
Q2FZL1	SAOUHSC_00989	Aminotransferase	7.42325	7.43933	7.39093	0	0	0	7.17026	7.25768	7.29667	0	0	7.12057	0	7.08279	0	7.73799	7.50515	7.68124	biosynthetic process;metabolic process	binding;catalytic activity;cofactor binding;pyridoxal phosphate binding;transaminase activity;transferase activity;transferase activity, transferring nitrogenous groups;vitamin B6 binding;vitamin binding		Lysine biosynthesis	+	1.72174	-1.67951	+	1.19928	-1.69692	+	2.02042	2.96544
Q2FZK7	atl	Bifunctional autolysin	8.27646	8.22531	8.21219	8.02531	8.07918	8.08636	7.99078	8.03342	8.04532	8.05308	8.08636	8.12057	7.95424	8.10037	7.97635	7.7185	7.66839	7.70757	amine metabolic process;aminoglycan catabolic process;aminoglycan metabolic process;carbohydrate catabolic process;carbohydrate metabolic process;catabolic process;cell wall organization;cell wall organization or biogenesis;cellular component organization or biogenesis;glycosaminoglycan catabolic process;glycosaminoglycan metabolic process;macromolecule catabolic process;macromolecule metabolic p…	amidase activity;catalytic activity;hydrolase activity;hydrolase activity, acting on carbon-nitrogen (but not peptide) bonds;hydrolase activity, acting on carbon-nitrogen (but not peptide) bonds, in linear amides;hydrolase activity, acting on glycosyl bonds;hydrolase activity, hydrolyzing O-glycosyl compounds;mannosyl-glycoprotein endo-beta-N-acetylglucosaminidase activity;N-acetylmuramoyl-L-alan…	extracellular region		+	2.49984	-0.579247	+	1.16763	0.210924	+	2.54157	-1.037
Q2FZK3	fmtA	Teichoic acid D-alanine hydrolase	8.61595	8.53403	8.49831	8.62221	8.55751	8.5172	8.2878	8.34044	8.36922	8.39794	8.49554	8.42488	8.04532	8.18469	8.11727	8.23045	8.25527	8.26007	cell wall organization;cell wall organization or biogenesis;cellular component organization or biogenesis;response to antibiotic;response to chemical stimulus;response to stimulus		cell part;membrane;plasma membrane					+	1.33065	0.35534	+	1.49042	0.44127
Q2FZK0	qoxB	Probable quinol oxidase subunit 1	8.29226	8.35411	8.35218	8.28556	8.25768	7.7796	8.06819	8.16137	8.11727	7.94792	7.87332	7.96426	7.70157	7.6637	7.75815	7.6149	7.57519	7.57287	aerobic respiration;cellular metabolic process;cellular process;cellular respiration;energy derivation by oxidation of organic compounds;generation of precursor metabolites and energy;metabolic process;oxidation-reduction process;oxidative phosphorylation;phosphate-containing compound metabolic process;phosphorus metabolic process;phosphorylation	binding;catalytic activity;cation binding;cation transmembrane transporter activity;copper ion binding;cytochrome-c oxidase activity;heme binding;heme-copper terminal oxidase activity;hydrogen ion transmembrane transporter activity;inorganic cation transmembrane transporter activity;ion binding;ion transmembrane transporter activity;iron ion binding;metal ion binding;monovalent inorganic cation t…	cell part;integral to membrane;intrinsic to membrane;membrane;membrane part;plasma membrane;respiratory chain	Oxidative phosphorylation				+	2.06899	-0.621557	+	1.76352	-0.399149
Q2FZJ9	qoxA	Probable quinol oxidase subunit 2	7.88593	7.8651	7.83885	7.0086	7.0569	0	7.9284	7.83759	7.7185	7.78746	7.83378	7.85854	7.81889	7.82347	7.69373	7.549	7.59439	7.57519	cellular metabolic process;cellular process;electron transport chain;generation of precursor metabolites and energy;metabolic process;oxidation-reduction process	binding;catalytic activity;cation binding;cation transmembrane transporter activity;copper ion binding;cytochrome bo3 ubiquinol oxidase activity;cytochrome o ubiquinol oxidase activity;cytochrome-c oxidase activity;heme-copper terminal oxidase activity;hydrogen ion transmembrane transporter activity;inorganic cation transmembrane transporter activity;ion binding;ion transmembrane transporter acti…	cell part;integral to membrane;intrinsic to membrane;membrane;membrane part;plasma membrane;respiratory chain	Oxidative phosphorylation	+	2.0771	-3.47297				+	2.00719	-0.683768
Q2FZJ7	SAOUHSC_01005	DUF5011 domain-containing protein	0	0	0	0	0	6.93406	6.79796	6.71684	6.75815	7.04922	6.96095	6.87448	6.93802	7.07555	6.88366	6.90146	7.02531	0								+	1.66835	0.677334
Q2FZJ6	folD	Bifunctional protein FolD	7.89432	7.85431	7.84634	7.65514	7.78176	7.85126	7.64246	7.64246	7.60638	7.79588	7.78176	7.78746	7.41162	7.549	7.53782	7.40824	7.48001	7.3784	amine biosynthetic process;amine metabolic process;aromatic compound biosynthetic process;aspartate family amino acid biosynthetic process;aspartate family amino acid metabolic process;biosynthetic process;carboxylic acid biosynthetic process;carboxylic acid metabolic process;cellular amine metabolic process;cellular amino acid biosynthetic process;cellular amino acid metabolic process;cellular a…	catalytic activity;cyclohydrolase activity;hydrolase activity;hydrolase activity, acting on carbon-nitrogen (but not peptide) bonds;hydrolase activity, acting on carbon-nitrogen (but not peptide) bonds, in cyclic amidines;methenyltetrahydrofolate cyclohydrolase activity;methylenetetrahydrofolate dehydrogenase (NADP+) activity;oxidoreductase activity;oxidoreductase activity, acting on the CH-NH gr…		Carbon fixation pathways in prokaryotes;One carbon pool by folate				+	3.61788	0.524626
Q2FZJ5	purE	N5-carboxyaminoimidazole ribonucleotide mutase	6.92376	7.04532	7.02531	0	0	0	6.83059	6.77232	6.77379	0	7.00877	0	6.935	6.84198	6.80754	6.81491	6.96332	0
Q2FZJ4	purK	N5-carboxyaminoimidazole ribonucleotide synthase	8.16435	8.3032	8.37475	8.52634	8.3962	8.52375	8.56585	8.66839	8.67852	8.59218	8.63649	8.52763	8.79727	8.62531	8.67669	8.65992	8.64738	8.67394	biosynthetic process;cellular biosynthetic process;cellular metabolic process;cellular nitrogen compound biosynthetic process;cellular nitrogen compound metabolic process;cellular process;'de novo' IMP biosynthetic process;heterocycle biosynthetic process;heterocycle metabolic process;IMP biosynthetic process;IMP metabolic process;metabolic process;nitrogen compound metabolic process;nucleobase-c…	5-(carboxyamino)imidazole ribonucleotide synthase activity;adenyl nucleotide binding;adenyl ribonucleotide binding;ATP binding;binding;carbon-carbon lyase activity;carboxy-lyase activity;catalytic activity;cation binding;coenzyme binding;cofactor binding;ion binding;ligase activity;ligase activity, forming carbon-nitrogen bonds;lyase activity;metal ion binding;NAD binding;nucleotide binding;phosp…		Purine metabolism	+	1.2561	0.668802
Q2FZJ3	purC	Phosphoribosylaminoimidazole-succinocarboxamide synthase	6.92942	7.04922	7.0607	7.09342	7.03743	0	7.08636	7.15229	7.11727	7.03743	6.97128	6.97864	7.04532	7.0086	7.11727	6.80414	6.78104	6.85065	biosynthetic process;cellular biosynthetic process;cellular metabolic process;cellular nitrogen compound biosynthetic process;cellular nitrogen compound metabolic process;cellular process;'de novo' IMP biosynthetic process;heterocycle biosynthetic process;heterocycle metabolic process;IMP biosynthetic process;IMP metabolic process;metabolic process;nitrogen compound metabolic process;nucleobase-c…	acid-amino acid ligase activity;adenyl nucleotide binding;adenyl ribonucleotide binding;ATP binding;binding;catalytic activity;ligase activity;ligase activity, forming carbon-nitrogen bonds;nucleotide binding;phosphoribosylaminoimidazolesuccinocarboxamide synthase activity;purine nucleotide binding;purine ribonucleoside triphosphate binding;purine ribonucleotide binding;ribonucleotide binding		Purine metabolism				+	1.91229	-0.408133	+	2.53041	-0.814284
Q2FZJ2	purS	Phosphoribosylformylglycinamidine synthase subunit PurS	7.56348	7.49831	7.48714	7.6981	7.50106	7.83442	7.65225	7.66087	7.71181	7.51054	7.60314	7.55145	7.57171	7.64246	7.53148	7.617	7.48714	7.54407	biosynthetic process;cellular biosynthetic process;cellular metabolic process;cellular nitrogen compound biosynthetic process;cellular nitrogen compound metabolic process;cellular process;'de novo' IMP biosynthetic process;heterocycle biosynthetic process;heterocycle metabolic process;IMP biosynthetic process;IMP metabolic process;metabolic process;nitrogen compound metabolic process;nucleobase-c…	adenyl nucleotide binding;adenyl ribonucleotide binding;ATP binding;binding;carbon-nitrogen ligase activity, with glutamine as amido-N-donor;catalytic activity;ligase activity;ligase activity, forming carbon-nitrogen bonds;nucleotide binding;phosphoribosylformylglycinamidine synthase activity;purine nucleotide binding;purine ribonucleoside triphosphate binding;purine ribonucleotide binding;ribonu…	cell part;cytoplasm;intracellular part					+	1.67283	-0.398387
Q2FZJ1	purQ	Phosphoribosylformylglycinamidine synthase subunit PurQ	7.63448	7.58883	7.53529	0	0	0	7.67394	7.64147	7.63649	7.62839	7.5611	7.57403	7.59106	7.70586	7.63749	7.61384	7.33846	7.48287	amine metabolic process;biosynthetic process;carboxylic acid metabolic process;cellular amine metabolic process;cellular amino acid metabolic process;cellular biosynthetic process;cellular ketone metabolic process;cellular metabolic process;cellular nitrogen compound biosynthetic process;cellular nitrogen compound metabolic process;cellular process;'de novo' IMP biosynthetic process;glutamine fam…	adenyl nucleotide binding;adenyl ribonucleotide binding;ATP binding;binding;carbon-nitrogen ligase activity, with glutamine as amido-N-donor;catalytic activity;glutaminase activity;hydrolase activity;hydrolase activity, acting on carbon-nitrogen (but not peptide) bonds;hydrolase activity, acting on carbon-nitrogen (but not peptide) bonds, in linear amides;ligase activity;ligase activity, forming …	cell part;cytoplasm;intracellular part	Purine metabolism	+	2.27737	-3.25403	+	1.24282	-0.208598
Q2FZJ0	purL	Phosphoribosylformylglycinamidine synthase subunit PurL	6.6721	0	6.66932	0	0	0	0	6.44716	6.46835	6.83059	6.79099	6.78604	0	0	0	0	0	0	biosynthetic process;cellular biosynthetic process;cellular metabolic process;cellular nitrogen compound biosynthetic process;cellular nitrogen compound metabolic process;cellular process;'de novo' IMP biosynthetic process;heterocycle biosynthetic process;heterocycle metabolic process;IMP biosynthetic process;IMP metabolic process;metabolic process;nitrogen compound metabolic process;nucleobase-c…	adenyl nucleotide binding;adenyl ribonucleotide binding;ATP binding;binding;carbon-nitrogen ligase activity, with glutamine as amido-N-donor;catalytic activity;cation binding;ion binding;ligase activity;ligase activity, forming carbon-nitrogen bonds;magnesium ion binding;metal ion binding;nucleotide binding;phosphoribosylformylglycinamidine synthase activity;purine nucleotide binding;purine ribon…	cell part;cytoplasm;intracellular part	Purine metabolism				+	2.50766	1.35108
Q2FZI9	purF	Amidophosphoribosyltransferase	7.52892	7.52892	7.5682	7.69285	7.59879	7.64147	7.39794	7.47422	7.38382	7.55871	7.52114	7.57978	7.30535	7.40993	7.34635	7.37475	7.3784	7.36173	amine metabolic process;biosynthetic process;carboxylic acid metabolic process;cellular amine metabolic process;cellular amino acid metabolic process;cellular aromatic compound metabolic process;cellular biosynthetic process;cellular ketone metabolic process;cellular metabolic process;cellular nitrogen compound biosynthetic process;cellular nitrogen compound metabolic process;cellular process;'de…	amidophosphoribosyltransferase activity;binding;catalytic activity;cation binding;ion binding;magnesium ion binding;metal ion binding;transferase activity;transferase activity, transferring glycosyl groups;transferase activity, transferring pentosyl groups		Alanine, aspartate and glutamate metabolism;Purine metabolism	+	1.56087	0.340029	+	1.82448	0.446975
Q2FZI8	purM	Phosphoribosylformylglycinamidine cyclo-ligase	7.88874	7.8791	7.81558	7.73878	7.80277	7.993	7.59988	7.67117	7.65896	7.8293	7.79934	7.88252	7.68753	7.72509	7.66652	7.53275	7.51054	7.56348	biosynthetic process;cellular biosynthetic process;cellular metabolic process;cellular nitrogen compound biosynthetic process;cellular nitrogen compound metabolic process;cellular process;'de novo' IMP biosynthetic process;heterocycle biosynthetic process;heterocycle metabolic process;IMP biosynthetic process;IMP metabolic process;metabolic process;nitrogen compound metabolic process;nucleobase-c…	adenyl nucleotide binding;adenyl ribonucleotide binding;ATP binding;binding;catalytic activity;cyclo-ligase activity;ligase activity;ligase activity, forming carbon-nitrogen bonds;nucleotide binding;phosphoribosylformylglycinamidine cyclo-ligase activity;purine nucleotide binding;purine ribonucleoside triphosphate binding;purine ribonucleotide binding;ribonucleotide binding	cell part;cytoplasm;intracellular part	Purine metabolism				+	2.38551	0.643511	+	2.62281	-0.52305
Q2FZI7	purN	Phosphoribosylglycinamide formyltransferase	8.01284	8.04922	8.02938	7.93044	7.88536	8.1038	7.83123	7.90255	7.83123	7.85914	7.85974	7.93601	7.75511	7.75282	7.71684	7.93601	7.7679	7.84942	biosynthetic process;cellular biosynthetic process;cellular metabolic process;cellular nitrogen compound biosynthetic process;cellular nitrogen compound metabolic process;cellular process;'de novo' IMP biosynthetic process;heterocycle biosynthetic process;heterocycle metabolic process;IMP biosynthetic process;IMP metabolic process;metabolic process;nitrogen compound metabolic process;nucleobase-c…	catalytic activity;hydroxymethyl-, formyl- and related transferase activity;phosphoribosylglycinamide formyltransferase activity;transferase activity;transferase activity, transferring one-carbon groups		One carbon pool by folate;Purine metabolism							+	1.02649	0.363819
Q2FZI6	purH	Bifunctional purine biosynthesis protein PurH	7.93702	8.17026	8.02119	8.2833	8.28556	8.18752	7.68664	7.60206	7.74351	7.70672	7.75587	7.75051	7.35411	7.35603	7.58092	7.2833	7.22011	7.26717	biosynthetic process;cellular biosynthetic process;cellular metabolic process;cellular nitrogen compound biosynthetic process;cellular nitrogen compound metabolic process;cellular process;'de novo' IMP biosynthetic process;heterocycle biosynthetic process;heterocycle metabolic process;IMP biosynthetic process;IMP metabolic process;metabolic process;nitrogen compound metabolic process;nucleobase-c…	catalytic activity;cyclohydrolase activity;hydrolase activity;hydrolase activity, acting on carbon-nitrogen (but not peptide) bonds;hydrolase activity, acting on carbon-nitrogen (but not peptide) bonds, in cyclic amidines;hydroxymethyl-, formyl- and related transferase activity;IMP cyclohydrolase activity;phosphoribosylaminoimidazolecarboxamide formyltransferase activity;transferase activity;tran…		One carbon pool by folate;Purine metabolism	+	1.29978	0.695292				+	1.04988	-0.576331
Q2FZI5	purD	Phosphoribosylamine--glycine ligase	0	0	7.00312	0	0	0	0	0	0	0	0	0	6.96661	7.08279	0	0	0	0
Q2FZI0	SAOUHSC_01024	Uncharacterized protein	8.55388	8.49831	8.57978	8.29447	8.3784	8.34044	8.26482	8.22789	8.30103	8.43297	8.53782	8.43136	8.20412	8.3075	8.233	8.22011	8.26951	8.19312					+	2.42098	-0.685057	+	2.10656	0.673707
Q2FZH9	SAOUHSC_01025	Uncharacterized protein	6.60485	0	0	0	6.43873	0	0	0	0	0	0	0	0	0	0	0	0	0
Q2FZH8	SAOUHSC_01026	Uncharacterized protein	0	0	0	0	0	0	0	5.77247	0	0	0	0	0	0	0	0	0	0
Q2FZH7	SAOUHSC_01027	Uncharacterized protein	8.26951	8.29226	8.32634	8.233	8.31597	8.17898	8.2878	8.26951	8.233	8.38021	8.42813	8.44871	8.16435	8.22789	8.22789	8.26482	8.28103	8.30963								+	2.41218	0.516827	+	1.46218	0.260611
Q2FZH6	SAOUHSC_01028	Histidine-containing protein	0	6.52244	6.62428	0	0	0	6.57519	6.55871	0	0	0	0	0	0	0	0	0	0
Q2FZH5	SAOUHSC_01029	Phosphoenolpyruvate-protein phosphotransferase	7.49554	7.51188	7.62221	7.48572	7.50786	7.28103	7.75205	7.77012	7.72509	7.75435	7.70501	7.60314	7.76193	7.90309	7.77159	7.38382	7.36736	7.44091	carbohydrate transport;establishment of localization;organic substance transport;phosphoenolpyruvate-dependent sugar phosphotransferase system;transport	binding;catalytic activity;cation binding;ion binding;kinase activity;metal ion binding;phosphoenolpyruvate-protein phosphotransferase activity;phosphotransferase activity, nitrogenous group as acceptor;transferase activity;transferase activity, transferring phosphorus-containing groups	cell part;cytoplasm;intracellular part	Phosphotransferase system (PTS)							+	2.91567	-1.37807
Q2FZH4	SAOUHSC_01030	Glutaredoxin domain-containing protein	7.42975	7.28103	7.33445	0	7.10595	0	7.32428	7.38561	7.36736	7.19866	7.24055	7.27184	7.42975	7.55751	7.50106	7.13354	7.13033	7.1959	biological regulation;cell redox homeostasis;cellular homeostasis;cellular process;homeostatic process;regulation of biological process;regulation of biological quality;regulation of cellular process	catalytic activity;disulfide oxidoreductase activity;electron carrier activity;oxidoreductase activity;oxidoreductase activity, acting on a sulfur group of donors;protein disulfide oxidoreductase activity			+	1.48811	-2.02202	+	1.92225	-0.405493	+	2.8849	-1.13892
Q2FZH3	SAOUHSC_01031	Cytochrome d ubiquinol oxidase, subunit I, putative	6.76418	6.83759	6.97359	0	0	0	0	0	6.743	0	0	0	6.77525	6.85974	6.90795	0	0	0			cell part;membrane	Oxidative phosphorylation							+	2.34168	-1.24016
Q2FZH2	SAOUHSC_01032	Cytochrome d ubiquinol oxidase, subunit II, putative	7.8169	7.70501	7.77597	7.52375	7.59439	7.78675	7.73239	7.64836	7.66745	7.52114	7.60097	7.57519	7.3927	7.43933	7.36361	7.37475	7.38382	7.38382		catalytic activity;oxidoreductase activity	cell part;membrane	Oxidative phosphorylation				+	1.55472	-0.388564
Q2FZH1	SAOUHSC_01034	Uncharacterized protein	0	0	6.44401	0	0	0	6.45177	0	0	0	0	0	0	0	0	0	0	0
Q2FZG9	rnj1	Ribonuclease J 1	0	0	6.1811	0	0	0	0	0	0	0	0	0	0	0	0	0	0	0
Q2FZG8	rpoY	DNA-directed RNA polymerase subunit epsilon	6.92428	7.0086	7.04922	6.98046	6.89763	0	6.87506	6.75815	6.85673	0	6.60249	6.66932	6.65514	6.51054	6.74272	0	0	6.52892
Q2FZG6	def	Peptide deformylase	7.65992	7.65514	7.63548	7.50106	7.53656	7.47567	7.75511	7.63448	7.63849	7.53148	7.53275	7.62014	7.15836	7.18469	7.24797	7.40654	0	7.54531	biosynthetic process;cellular biosynthetic process;cellular macromolecule biosynthetic process;cellular macromolecule metabolic process;cellular metabolic process;cellular process;cellular protein metabolic process;macromolecule biosynthetic process;macromolecule metabolic process;metabolic process;primary metabolic process;protein metabolic process;translation	binding;catalytic activity;cation binding;hydrolase activity;hydrolase activity, acting on carbon-nitrogen (but not peptide) bonds;hydrolase activity, acting on carbon-nitrogen (but not peptide) bonds, in linear amides;ion binding;iron ion binding;metal ion binding;peptide deformylase activity;transition metal ion binding			+	2.79388	-0.48417
Q2FZG5	SAOUHSC_01039	Uncharacterized protein	8.18184	8.04139	8.01284	8.02938	8.06446	7.98408	8.01284	7.98498	7.99564	8.2014	8.22272	8.2014	8.02119	8.1038	8.02531	8.25768	8.16435	8.23045								+	4.39225	0.699888	+	1.91048	0.55607
Q2FZG4	pdhA	Pyruvate dehydrogenase E1 component subunit alpha	6.60746	6.75815	6.69285	0	0	0	6.72099	6.67117	6.77525	0	6.61092	0	6.6637	6.76268	6.83885	6.68574	6.6721	6.70501		catalytic activity;oxidoreductase activity;oxidoreductase activity, acting on the aldehyde or oxo group of donors;oxidoreductase activity, acting on the aldehyde or oxo group of donors, disulfide as acceptor;pyruvate dehydrogenase (acetyl-transferring) activity;pyruvate dehydrogenase activity		Butanoate metabolism;Citrate cycle (TCA cycle);Glycolysis / Gluconeogenesis;Pyruvate metabolism;Valine, leucine and isoleucine biosynthesis				+	1.53593	-0.813556
Q2FZG1	SAOUHSC_01069	Uncharacterized protein	0	0	0	0	0	0	0	0	0	0	0	0	0	0	0	6.63043	0	0
Q2FZF9	SAOUHSC_01071	Glycerophosphoryl diester phosphodiesterase, putative	0	0	0	0	0	0	0	0	0	0	0	0	6.5611	6.4216	6.43775	0	0	0
Q2FZF6	SAOUHSC_01074	Uncharacterized protein	0	0	6.87187	0	0	0	0	0	0	0	0	0	0	6.71265	6.9489	0	0	0
Q2FZF5	coaD	Phosphopantetheine adenylyltransferase	0	0	0	0	0	0	0	0	0	0	0	0	0	0	0	6.90848	6.92169	6.95617
Q2FZF3	SAOUHSC_01077	Uncharacterized protein	7.96988	8.03743	7.98543	8.17731	0	0	8.36173	8.36549	8.28103	8.18876	0	8.07918	8.21748	8.20683	8.25768	8.38382	8.28556	0
Q2FZF1	rpmF	50S ribosomal protein L32	8.08636	8.03743	8.06446	0	0	0	8.42975	8.51188	8.4183	8.34439	8.43616	8.43775	8.15836	8.05308	8.20412	8.53148	8.549	8.54407	biosynthetic process;cellular biosynthetic process;cellular macromolecule biosynthetic process;cellular macromolecule metabolic process;cellular metabolic process;cellular process;cellular protein metabolic process;macromolecule biosynthetic process;macromolecule metabolic process;metabolic process;primary metabolic process;protein metabolic process;translation	structural constituent of ribosome;structural molecule activity	cell part;intracellular organelle part;intracellular part;large ribosomal subunit;macromolecular complex;organelle part;ribonucleoprotein complex		+	2.15909	-4.91385				+	3.06474	1.33873
Q2FZF0	isdB	Iron-regulated surface determinant protein B	7.41996	7.5682	7.55871	7.57519	7.54407	7.3483	7.63144	7.63949	7.56703	7.53529	7.51983	7.62634	7.49831	7.55871	7.45939	7.41162	7.4133	7.43616	multi-organism process;pathogenesis	binding;cation binding;cofactor transporter activity;heme transporter activity;ion binding;metal ion binding;transporter activity	cell part;cell wall;external encapsulating structure;extracellular region;membrane								+	1.32957	-0.282728
Q2FZE9	isdA	Iron-regulated surface determinant protein A	0	0	0	0	0	0	0	0	6.34906	6.55023	6.62325	0	6.23805	6.37475	0	0	0	0
Q2FZE6	isdE	High-affinity heme uptake system protein IsdE	7.28556	7.19033	7.16732	0	0	7.08271	6.94399	6.95761	6.97681	7.08636	7.04922	7.06819	6.90363	6.9987	7.06446	7.13988	0	0	cofactor transport;establishment of localization;heme transport;transport	binding;cation binding;heme binding;ion binding;iron ion binding;metal ion binding;tetrapyrrole binding;transition metal ion binding	cell part;membrane;plasma membrane	ABC transporters				+	2.78575	0.360273
Q2FZE0	SAOUHSC_01091	SpoU_sub_bind domain-containing protein	9.23045	9.233	9.1959	9.25285	9.18752	8.9987	9.30963	9.30963	9.32838	9.11059	9.07918	9.0607	9.33646	9.3927	9.4133	8.95037	8.89927	8.92117	cellular macromolecule metabolic process;cellular metabolic process;cellular nitrogen compound metabolic process;cellular process;macromolecule metabolic process;metabolic process;nitrogen compound metabolic process;nucleic acid metabolic process;nucleobase-containing compound metabolic process;primary metabolic process;RNA metabolic process;RNA processing	binding;catalytic activity;methyltransferase activity;nucleic acid binding;RNA binding;RNA methyltransferase activity;transferase activity;transferase activity, transferring one-carbon groups						+	3.90025	-0.771984	+	4.12676	-1.51884
Q2FZD9	pheS	Phenylalanine--tRNA ligase alpha subunit	7.95376	7.94743	7.89708	7.88081	7.90687	8.0086	8.04922	8.03743	8.04532	7.99255	8.02531	8.0569	8.02119	8	8.04922	7.96848	7.96142	7.94596	amine metabolic process;amino acid activation;carboxylic acid metabolic process;cellular amine metabolic process;cellular amino acid metabolic process;cellular ketone metabolic process;cellular macromolecule metabolic process;cellular metabolic process;cellular nitrogen compound metabolic process;cellular process;macromolecule metabolic process;metabolic process;ncRNA metabolic process;nitrogen c…	adenyl nucleotide binding;adenyl ribonucleotide binding;aminoacyl-tRNA ligase activity;ATP binding;binding;catalytic activity;cation binding;ion binding;ligase activity;ligase activity, forming aminoacyl-tRNA and related compounds;ligase activity, forming carbon-oxygen bonds;magnesium ion binding;metal ion binding;nucleic acid binding;nucleotide binding;phenylalanine-tRNA ligase activity;purine n…	cell part;cytoplasm;intracellular part	Aminoacyl-tRNA biosynthesis							+	1.83627	-0.215419
Q2FZD8	pheT	Phenylalanine--tRNA ligase beta subunit	7.16435	7.1959	7.19033	7.13354	7.13354	7.11394	7.25042	7.21219	7.09342	7.1271	7.13354	7.14922	7.15534	7.15534	7.13672	7.18184	7.25042	7.18752	amine metabolic process;amino acid activation;carboxylic acid metabolic process;cellular amine metabolic process;cellular amino acid metabolic process;cellular ketone metabolic process;cellular macromolecule metabolic process;cellular metabolic process;cellular nitrogen compound metabolic process;cellular process;macromolecule metabolic process;metabolic process;ncRNA metabolic process;ncRNA proc…	adenyl nucleotide binding;adenyl ribonucleotide binding;aminoacyl-tRNA ligase activity;ATP binding;binding;catalytic activity;cation binding;ion binding;ligase activity;ligase activity, forming aminoacyl-tRNA and related compounds;ligase activity, forming carbon-oxygen bonds;magnesium ion binding;metal ion binding;nucleic acid binding;nucleotide binding;phenylalanine-tRNA ligase activity;purine n…	cell part;cytoplasm;intracellular part	Aminoacyl-tRNA biosynthesis	+	2.07127	-0.187759				+	1.18317	0.190891
Q2FZD7	rnhC	Ribonuclease HIII	9.63949	9.5682	9.67852	9.74273	9.64542	9.49136	9.73239	9.82543	9.83378	9.71349	9.66652	9.63949	9.83506	9.85733	9.79309	10.0569	9.96755	9.97359	catabolic process;cellular catabolic process;cellular macromolecule catabolic process;cellular macromolecule metabolic process;cellular metabolic process;cellular nitrogen compound metabolic process;cellular process;macromolecule catabolic process;macromolecule metabolic process;metabolic process;nitrogen compound metabolic process;nucleic acid metabolic process;nucleobase-containing compound met…	binding;catalytic activity;cation binding;endonuclease activity;endonuclease activity, active with either ribo- or deoxyribonucleic acids and producing 5'-phosphomonoesters;endoribonuclease activity;endoribonuclease activity, producing 5'-phosphomonoesters;hydrolase activity;hydrolase activity, acting on ester bonds;ion binding;magnesium ion binding;metal ion binding;nuclease activity;nucleic aci…	cell part;cytoplasm;intracellular part	DNA replication				+	1.47369	-0.412039	+	2.11356	0.567565
Q2FZD6	SAOUHSC_01096	Uncharacterized protein	0	0	0	0	0	0	6.98677	0	7.07918	0	0	0	0	0	0	0	0	0
Q2FZD5	SAOUHSC_01097	Uncharacterized protein	6.5977	7.05308	7.1271	7.04139	7.01703	6.94547	6.89818	6.89873	6.85431	7.08991	7.08636	7.0086	6.98046	7.01703	6.93399	6.96473	6.95376	6.91751	biosynthetic process;cellular biosynthetic process;cellular metabolic process;cellular process;metabolic process;secondary metabolic process;toxin biosynthetic process;toxin metabolic process		cell part;membrane					+	2.37429	0.590924
Q2FZD4	SAOUHSC_01098	DNA polymerase beta	0	6.36922	6.33041	0	0	0	0	0	6.33634	0	6.46855	6.41162	0	0	0	0	0	0
Q2FZD3	mutS2	Endonuclease MutS2	7.04532	6.82217	6.93702	0	0	6.77722	6.43136	0	6.55023	0	0	0	6.56229	6.73878	6.64542	0	0	0	biological regulation;cellular macromolecule metabolic process;cellular metabolic process;cellular nitrogen compound metabolic process;cellular process;cellular response to stimulus;cellular response to stress;DNA metabolic process;DNA repair;macromolecule metabolic process;metabolic process;mismatch repair;negative regulation of biological process;negative regulation of cellular metabolic proces…	adenyl nucleotide binding;adenyl ribonucleotide binding;ATP binding;ATPase activity;binding;catalytic activity;DNA binding;double-stranded DNA binding;endonuclease activity;hydrolase activity;hydrolase activity, acting on acid anhydrides;hydrolase activity, acting on acid anhydrides, in phosphorus-containing anhydrides;hydrolase activity, acting on ester bonds;mismatched DNA binding;nuclease acti…		Mismatch repair	+	1.29463	-0.800223				+	1.28482	-0.696655
Q2FZD2	trxA	Thioredoxin	7.18752	7.16732	7.14613	0	7.09513	0	7.08991	7.09342	7.03743	0	7.06168	7.11727	7.03743	7.07188	6.96142	6.99607	7.00432	6.9345
Q2FZC8	SAOUHSC_01104	Succinate dehydrogenase, flavoprotein chain TC0881, putative	0	0	0	0	0	0	0	0	0	0	0	0	0	0	0	6.38021	0	0
Q2FZC7	SAOUHSC_01105	Iron-sulphur subunit of succinate dehydrogenase, putative	6.80821	7.07555	7.00432	7.31806	7.21219	7.28103	7.0086	6.86392	6.78462	6.85065	6.66276	0	6.73957	6.75128	6.93902	0	0	0	acetyl-CoA catabolic process;acetyl-CoA metabolic process;catabolic process;cellular catabolic process;cellular metabolic process;cellular process;coenzyme catabolic process;coenzyme metabolic process;cofactor catabolic process;cofactor metabolic process;metabolic process;tricarboxylic acid cycle	binding;catalytic activity;electron carrier activity;iron-sulfur cluster binding;metal cluster binding;oxidoreductase activity		Butanoate metabolism;Carbon fixation pathways in prokaryotes;Citrate cycle (TCA cycle);Oxidative phosphorylation;Toluene degradation	+	1.63868	1.02227				+	2.56815	-1.47231
Q2FZC6	murI	Glutamate racemase	6.48855	6.54283	6.73957	0	0	0	6.93601	6.75358	6.77887	6.62634	6.63749	6.62325	6.50515	6.62737	6.5092	6.25527	0	6.47422	amine metabolic process;aminoglycan biosynthetic process;aminoglycan metabolic process;biological regulation;biosynthetic process;carbohydrate biosynthetic process;carbohydrate metabolic process;cell wall macromolecule biosynthetic process;cell wall macromolecule metabolic process;cell wall organization;cell wall organization or biogenesis;cellular biosynthetic process;cellular cell wall macromol…	amino-acid racemase activity;catalytic activity;glutamate racemase activity;isomerase activity;racemase and epimerase activity;racemase and epimerase activity, acting on amino acids and derivatives		D-Glutamine and D-glutamate metabolism				+	1.55878	-0.643778
Q2FZC5	SAOUHSC_01107	dITP/XTP pyrophosphatase	8.55145	8.61595	8.55145	8.42651	8.51322	8.49415	8.57634	8.5966	8.58883	8.57287	8.56937	8.56467	8.65031	8.68664	8.72181	8.57054	8.49415	8.54033	catabolic process;cellular catabolic process;cellular metabolic process;cellular nitrogen compound catabolic process;cellular nitrogen compound metabolic process;cellular process;heterocycle metabolic process;metabolic process;nitrogen compound metabolic process;nucleobase-containing compound catabolic process;nucleobase-containing compound metabolic process;nucleobase-containing small molecule m…	binding;catalytic activity;cation binding;hydrolase activity;hydrolase activity, acting on acid anhydrides;hydrolase activity, acting on acid anhydrides, in phosphorus-containing anhydrides;ion binding;metal ion binding;nucleoside-triphosphatase activity;nucleoside-triphosphate diphosphatase activity;nucleotide binding;pyrophosphatase activity		Purine metabolism;Thiamine metabolism	+	1.30964	-0.315547	+	1.34437	-0.0607459	+	2.12174	-0.502416
Q2FZC4	SAOUHSC_01108	Phosphoesterase	0	0	0	0	0	0	0	0	0	0	0	6.04922	0	0	0	0	0	0
Q2FZC2	SAOUHSC_01110	Fibrinogen-binding protein	0	0	0	0	0	0	0	0	0	0	0	0	0	6.62014	0	0	0	0
Q2FZC0	flr	FPRL1 inhibitory protein	8.41664	8.45484	8.38561	8.42325	8.44716	8.44871	8.57287	8.55267	8.55991	8.48001	8.5092	8.41497	8.40483	8.36361	8.39794	8.49276	8.47567	8.45484	multi-organism process;pathogenesis		extracellular region	Staphylococcus aureus infection				+	1.52104	-0.311446	+	2.15383	0.284458
Q2FZB8	SAOUHSC_01114	Fibrinogen-binding protein	0	0	0	0	0	0	0	0	5.4647	0	0	0	0	0	0	0	0	0
Q2FZB7	SAOUHSC_01115	Staphylococcal complement inhibitor	8.51983	8.51455	8.50515	8.71684	8.617	8.75967	8.44248	8.53275	8.50106	8.43775	8.46982	8.47129	8.60638	8.53529	8.50379	8.39794	8.33646	8.36736				Staphylococcus aureus infection	+	1.91401	0.613428				+	2.17285	-0.602057
Q2FZB4	SAOUHSC_01123	Uncharacterized protein	6.98318	7.15534	7.18752	0	0	0	7.07555	7.01284	7.0086	6.67394	6.71517	6.935	7.13354	7.24797	7.08991	6.86273	6.86688	6.87967					+	2.17689	-1.89308	+	1.42911	-0.855808	+	2.42728	-0.954659
Q2FZB2	SAOUHSC_01125	Stap_Strp_tox_C domain-containing protein	0	0	0	0	0	0	0	0	0	0	0	7.14922	0	0	0	0	0	0
Q2FZB1	SAOUHSC_01127	Stap_Strp_tox_C domain-containing protein	6.55388	6.77743	6.80277	0	0	0	6.68664	6.78746	6.70586	6.90146	6.92169	6.96237	6.77597	6.85187	6.74507	6.81224	6.8739	6.87795	multi-organism process;pathogenesis		extracellular region					+	2.31592	0.670535
Q2FZA5	SAOUHSC_01134	Uncharacterized protein	6.99913	6.97955	7.0569	6.81624	6.96142	0	7.04139	7.0569	7.1271	6.87506	7.07555	6.98989	7.01703	6.88252	7.10721	6.97359	6.70757	6.76938
Q2FZA4	SAOUHSC_01135	Uncharacterized protein	8.16435	8.26482	8.24055	7.83442	7.81291	7.22789	8.23805	8.29885	8.25768	8.15836	8.13354	8.10037	8.28556	8.2833	8.15229	8.09691	7.98989	7.99388	multi-organism process;pathogenesis				+	1.38836	-1.98707	+	2.26203	-0.445477	+	1.71639	-0.709194
Q2FZA3	SAOUHSC_01136	Uncharacterized protein	7.77887	7.70415	7.716	7.26951	7.58433	7.56467	7.88366	7.89542	7.85003	7.76938	7.75664	7.74896	7.72997	7.81291	7.7767	7.71349	7.61805	7.57749	multi-organism process;pathogenesis							+	2.86807	-0.392144	+	1.36271	-0.454615
Q2FZA2	SAOUHSC_01137	Uncharacterized protein	6.49136	0	6.46389	0	0	0	6.71767	6.5832	6.85491	0	6.5916	0	6.5977	6.66558	0	0	0	6.5302
Q2FZA1	SAOUHSC_01138	Uncharacterized N-acetyltransferase SAOUHSC_01138	6.80414	7.59879	7.47129	8.83315	9.02531	8.89708	8.63347	8.70586	8.57978	9.46389	9.57287	9.48001	9.14613	9.14613	9.05308	10.6637	10.5551	10.6325		acetyltransferase activity;catalytic activity;N-acetyltransferase activity;N-acyltransferase activity;transferase activity;transferase activity, transferring acyl groups;transferase activity, transferring acyl groups other than amino-acyl groups			+	2.52329	5.40512	+	4.18963	2.87641	+	5.32723	4.98945
Q2FZ98	bshC	Putative cysteine ligase BshC	8.57403	8.7679	8.58883	9.1959	9.25285	8.78958	9.13988	9.16732	9.13988	9.21219	9.27416	9.18469	9.27875	9.15229	9.19312	9.60853	9.53529	9.55871					+	1.28835	1.44789	+	1.25185	0.247995	+	2.94829	1.19408
Q2FZ97	mraZ	Transcriptional regulator MraZ	8.09342	8.2878	8.29003	8.72016	8.62014	8.71181	8.1959	8.27184	8.33445	8.27646	8.21748	8.13033	8.64836	8.45025	8.4624	8.4216	8.38202	8.44091	biosynthetic process;cellular biosynthetic process;cellular macromolecule biosynthetic process;cellular macromolecule metabolic process;cellular metabolic process;cellular nitrogen compound metabolic process;cellular process;macromolecule biosynthetic process;macromolecule metabolic process;metabolic process;nitrogen compound metabolic process;nucleic acid metabolic process;nucleobase-containing …	binding;DNA binding;nucleic acid binding;nucleic acid binding transcription factor activity;sequence-specific DNA binding transcription factor activity	cell part;cytoplasm;intracellular non-membrane-bounded organelle;intracellular organelle;intracellular part;non-membrane-bounded organelle;nucleoid;organelle		+	2.49858	1.52902
Q2FZ95	ftsL	Cell division protein FtsL	7.43136	7.36361	7.4456	0	0	0	7.3962	7.40824	7.35411	7.12057	7.233	7.18184	7.23805	7.32634	7.24304	7.22011	0	7.3032	asexual reproduction;cellular process;cytokinesis;cytokinesis by binary fission;reproduction;reproduction of a single-celled organism		cell division site;cell part;integral to membrane;integral to plasma membrane;intrinsic to membrane;intrinsic to plasma membrane;membrane part;plasma membrane part		+	3.78673	-2.91553	+	2.33112	-0.690002
Q2FZ94	SAOUHSC_01145	Penicillin-binding protein 1	7.33445	0	7.17609	7.35025	7.40993	7.41497	7.03342	7.10037	7.16137	7.31387	7.26007	7.15534	7.25285	7.33646	7.28556	7.27646	7.22789	7.20952		binding;carboxylic acid binding;drug binding;penicillin binding		Peptidoglycan biosynthesis				+	1.14513	0.480697
Q2FZ92	murD	UDP-N-acetylmuramoylalanine--D-glutamate ligase	7.7767	7.7348	7.7679	7.79309	7.7839	7.83378	7.82413	7.85309	7.75815	7.79379	7.82282	7.84198	7.85248	7.91855	7.83442	7.91487	7.83822	7.91275
Q2FZ91	divIB	Cell division protein DivIB	8.34439	8.61066	8.61595	8.60206	8.5302	8.56937	8.33646	8.35411	8.43933	8.06446	8.00432	8.1038	8.27646	8.40824	8.38202	7.92891	8.02938	7.99123	asexual reproduction;cellular process;cytokinesis;cytokinesis by binary fission;reproduction;reproduction of a single-celled organism		cell division site;cell part;integral to membrane;integral to plasma membrane;intrinsic to membrane;intrinsic to plasma membrane;membrane part;plasma membrane part	Cell cycle - Caulobacter				+	2.7561	-1.06005	+	2.76725	-1.23709
Q2FZ89	ftsZ	Cell division protein FtsZ	0	6.90633	6.76118	7.44248	7.43297	7.26951	7.08991	7.25527	7.32428	7.61066	7.56348	7.48714	7.68124	7.54531	7.31175	7.55751	7.79309	7.73878	asexual reproduction;barrier septum formation;cellular component assembly;cellular component assembly at cellular level;cellular component organization;cellular component organization at cellular level;cellular component organization or biogenesis;cellular component organization or biogenesis at cellular level;cellular macromolecular complex assembly;cellular macromolecular complex subunit organi…	binding;catalytic activity;GTP binding;GTPase activity;guanyl nucleotide binding;guanyl ribonucleotide binding;hydrolase activity;hydrolase activity, acting on acid anhydrides;hydrolase activity, acting on acid anhydrides, in phosphorus-containing anhydrides;nucleoside-triphosphatase activity;nucleotide binding;purine nucleotide binding;purine ribonucleoside triphosphate binding;purine ribonucleo…	cell division site;cell part;cytoplasm;intracellular part;macromolecular complex;protein complex	Cell cycle - Caulobacter	+	2.46535	2.05562	+	1.87121	1.09825
Q2FZ88	SAOUHSC_01152	Purine nucleoside phosphorylase	7.87332	7.81624	7.81425	0	7.26482	7.14922	8.00432	7.97313	7.97451	7.6902	7.72181	7.70415	7.76567	7.69723	7.8488	8.29885	8.27875	8.19866					+	1.64097	-2.87382	+	4.4641	-0.925494	+	3.09826	1.62172
Q2FZ87	SAOUHSC_01153	Pyridoxal phosphate homeostasis protein	7.51983	7.60959	7.53656	7.54158	7.53275	7.90417	6.8537	0	7.25527	0	0	0	0	0	0	0	0	0
Q2FZ86	sepF	Cell division protein SepF	7.39093	7.35025	7.42488	7.17609	7.27875	7.46835	7.35025	7.35793	7.40654	7.46389	7.50786	7.50786	7.35025	7.42325	7.39445	7.50243	7.5172	7.56467	asexual reproduction;barrier septum formation;cellular component assembly;cellular component assembly at cellular level;cellular component organization;cellular component organization at cellular level;cellular component organization or biogenesis;cellular component organization or biogenesis at cellular level;cellular process;cytokinesis;cytokinesis by binary fission;cytokinetic process;reproduc…		cell part;cytoplasm;intracellular part					+	2.21752	0.404037	+	2.09359	0.461021
Q2FZ85	SAOUHSC_01155	Uncharacterized protein	0	6.77232	6.80003	0	0	0	6.90956	6.77159	6.72346	6.99607	7.09342	6.94547	7.43616	7.57634	7.20412	7.1038	7.07918	7.01703			cell part;membrane					+	1.38698	0.698009	+	1.41454	-1.1257
Q2FZ83	SAOUHSC_01158	Uncharacterized protein	7.38917	7.51188	7.49276	0	0	0	7.54531	7.49276	7.3784	7.17345	0	0	8.25285	8.25768	8.0569	7.84386	7.84136	7.71349	cell cycle;cell division;cellular process		cell part;cytoplasm;intracellular part		+	2.60358	-2.7342	+	1.47667	-2.17676	+	2.10604	-1.29415
Q2FZ82	ileS	Isoleucine--tRNA ligase	8.13354	8.23553	8.17898	8.3032	8.17319	8.11727	8.17319	8.11727	8.13988	7.97635	7.95665	7.99476	8.15836	8.25527	8.28556	7.91698	7.95182	7.85187	amine metabolic process;amino acid activation;carboxylic acid metabolic process;cellular amine metabolic process;cellular amino acid metabolic process;cellular ketone metabolic process;cellular macromolecule metabolic process;cellular metabolic process;cellular nitrogen compound metabolic process;cellular process;isoleucyl-tRNA aminoacylation;macromolecule metabolic process;metabolic process;ncRN…	adenyl nucleotide binding;adenyl ribonucleotide binding;aminoacyl-tRNA editing activity;aminoacyl-tRNA ligase activity;ATP binding;binding;carboxylic ester hydrolase activity;catalytic activity;cation binding;hydrolase activity;hydrolase activity, acting on ester bonds;ion binding;isoleucine-tRNA ligase activity;ligase activity;ligase activity, forming aminoacyl-tRNA and related compounds;ligase …	cell part;cytoplasm;intracellular part	Aminoacyl-tRNA biosynthesis;Valine, leucine and isoleucine biosynthesis				+	2.98643	-0.556513	+	2.60199	-1.08352
Q2FZ79	lspA	Lipoprotein signal peptidase	0	0	0	0	0	0	0	0	0	0	0	5.77159	0	0	0	0	0	0
Q2FZ78	SAOUHSC_01163	Pseudouridine synthase	7.66464	7.7356	7.69373	7.68931	7.62839	7.45179	7.66839	7.72181	7.72997	7.7796	7.7356	7.79379	7.83759	7.86332	7.86923	7.72997	7.65514	7.6561	cellular macromolecule metabolic process;cellular metabolic process;cellular nitrogen compound metabolic process;cellular process;macromolecule metabolic process;macromolecule modification;metabolic process;nitrogen compound metabolic process;nucleic acid metabolic process;nucleobase-containing compound metabolic process;primary metabolic process;pseudouridine synthesis;RNA metabolic process;RNA …	binding;catalytic activity;intramolecular transferase activity;isomerase activity;nucleic acid binding;pseudouridine synthase activity;RNA binding						+	1.13518	0.209076	+	2.56927	-0.585691
Q2FZ77	pyrR	Bifunctional protein PyrR	7.02938	7.09342	7.06819	0	0	0	0	0	0	0	0	0	7.35025	7.48714	7.24304	7.28103	7.28556	0
Q2FZ76	SAOUHSC_01165	Uracil permease, putative	0	0	0	0	0	7.37756	0	0	0	0	0	0	0	0	0	0	0	0
Q2FZ75	pyrB	Aspartate carbamoyltransferase	9.56229	9.43933	9.46982	9.97543	9.89818	9.61909	9.81823	9.8651	9.84448	9.84572	9.86392	9.70757	9.68034	9.59988	9.65225	9.76716	9.73078	9.77085	amine metabolic process;biosynthetic process;carboxylic acid metabolic process;cellular amine metabolic process;cellular amino acid metabolic process;cellular aromatic compound metabolic process;cellular biosynthetic process;cellular ketone metabolic process;cellular metabolic process;cellular nitrogen compound biosynthetic process;cellular nitrogen compound metabolic process;cellular process;'de…	amine binding;amino acid binding;aspartate carbamoyltransferase activity;binding;carboxyl- or carbamoyltransferase activity;carboxylic acid binding;catalytic activity;transferase activity;transferase activity, transferring one-carbon groups		Alanine, aspartate and glutamate metabolism;Pyrimidine metabolism	+	1.38851	1.13084				+	1.85653	0.372416
Q2FZ74	pyrC	Dihydroorotase	7.0086	7.01703	7.15229	0	0	0	7.02531	7.02938	6.94939	6.9619	7.01703	7.0086	6.97772	7.14613	6.97818	7.03342	7.04532	6.98091	biosynthetic process;cellular biosynthetic process;cellular metabolic process;cellular nitrogen compound biosynthetic process;cellular nitrogen compound metabolic process;cellular process;'de novo' UMP biosynthetic process;heterocycle biosynthetic process;heterocycle metabolic process;metabolic process;nitrogen compound metabolic process;nucleobase-containing compound biosynthetic process;nucleob…	binding;catalytic activity;cation binding;dihydroorotase activity;hydrolase activity;hydrolase activity, acting on carbon-nitrogen (but not peptide) bonds;hydrolase activity, acting on carbon-nitrogen (but not peptide) bonds, in cyclic amides;ion binding;metal ion binding;transition metal ion binding;zinc ion binding		Pyrimidine metabolism	+	1.39002	-1.55219
Q2FZ73	carA	Carbamoyl-phosphate synthase small chain	0	0	6.29964	0	0	0	6.45939	6.48144	6.59218	0	6.65059	0	6.6561	6.71684	6.66652	0	6.57864	0	amine biosynthetic process;amine catabolic process;amine metabolic process;arginine biosynthetic process;arginine metabolic process;biosynthetic process;carbamoyl phosphate biosynthetic process;carbamoyl phosphate metabolic process;carboxylic acid biosynthetic process;carboxylic acid catabolic process;carboxylic acid metabolic process;catabolic process;cellular amine metabolic process;cellular am…	adenyl nucleotide binding;adenyl ribonucleotide binding;ATP binding;binding;carbamoyl-phosphate synthase (glutamine-hydrolyzing) activity;carbon-nitrogen ligase activity, with glutamine as amido-N-donor;catalytic activity;ligase activity;ligase activity, forming carbon-nitrogen bonds;nucleotide binding;purine nucleotide binding;purine ribonucleoside triphosphate binding;purine ribonucleotide bind…		Alanine, aspartate and glutamate metabolism;Pyrimidine metabolism							+	1.14381	-1.81229
Q2FZ72	carB	Carbamoyl-phosphate synthase large chain	0	0	0	0	0	0	6.68421	0	0	0	0	0	6.83187	6.75664	6.92686	6.88309	0	6.84448	amine biosynthetic process;amine metabolic process;arginine biosynthetic process;arginine metabolic process;biosynthetic process;carboxylic acid biosynthetic process;carboxylic acid metabolic process;cellular amine metabolic process;cellular amino acid biosynthetic process;cellular amino acid metabolic process;cellular biosynthetic process;cellular ketone metabolic process;cellular metabolic proc…	adenyl nucleotide binding;adenyl ribonucleotide binding;ATP binding;binding;carbamoyl-phosphate synthase (glutamine-hydrolyzing) activity;carbon-nitrogen ligase activity, with glutamine as amido-N-donor;catalytic activity;cation binding;ion binding;ligase activity;ligase activity, forming carbon-nitrogen bonds;metal ion binding;nucleotide binding;purine nucleotide binding;purine ribonucleoside tr…		Alanine, aspartate and glutamate metabolism;Pyrimidine metabolism	+	1.40103	1.85574
Q2FZ71	pyrF	Orotidine 5-phosphate decarboxylase	8.15229	8.17609	8.17026	8.04532	8.08636	8.03342	8.15836	8.18469	8.12385	8.07555	8.03342	8.10721	7.935	7.91908	7.98318	7.97681	7.98945	8.0086	biosynthetic process;cellular aromatic compound metabolic process;cellular biosynthetic process;cellular metabolic process;cellular nitrogen compound biosynthetic process;cellular nitrogen compound metabolic process;cellular process;'de novo' pyrimidine base biosynthetic process;'de novo' UMP biosynthetic process;heterocycle biosynthetic process;heterocycle metabolic process;metabolic process;nit…	carbon-carbon lyase activity;carboxy-lyase activity;catalytic activity;lyase activity;orotidine-5'-phosphate decarboxylase activity		Pyrimidine metabolism	+	2.49666	-0.369326	+	1.4061	-0.27763
Q2FZ70	pyrE	Orotate phosphoribosyltransferase	7.59439	7.67761	7.71767	7.68664	7.6981	7.62221	7.68664	7.63949	7.58771	7.5966	7.62325	7.734	7.46982	7.51054	7.53908	7.46687	7.44091	7.45332	biosynthetic process;cellular biosynthetic process;cellular metabolic process;cellular nitrogen compound biosynthetic process;cellular nitrogen compound metabolic process;cellular process;'de novo' UMP biosynthetic process;heterocycle biosynthetic process;heterocycle metabolic process;metabolic process;nitrogen compound metabolic process;nucleobase-containing compound biosynthetic process;nucleob…	binding;catalytic activity;cation binding;ion binding;magnesium ion binding;metal ion binding;orotate phosphoribosyltransferase activity;transferase activity;transferase activity, transferring glycosyl groups;transferase activity, transferring pentosyl groups		Pyrimidine metabolism							+	1.15729	-0.17534
Q2FZ68	fmt	Methionyl-tRNA formyltransferase	7.74429	7.78888	7.94792	7.56348	7.56703	7.57054	7.69897	7.62941	7.81624	0	0	0	7.63043	7.87216	7.77232	0	0	0		catalytic activity;hydroxymethyl-, formyl- and related transferase activity;methionyl-tRNA formyltransferase activity;methyltransferase activity;transferase activity;transferase activity, transferring one-carbon groups		Aminoacyl-tRNA biosynthesis;One carbon pool by folate	+	1.86514	-0.863747	+	2.7749	-4.14725	+	4.28984	-4.35144
Q2FZ67	SAOUHSC_01184	16S rRNA m5C967 methyltransferase	0	0	0	0	0	0	0	0	0	0	0	6.97955	0	0	0	0	0	0
Q2FZ66	rlmN	Probable dual-specificity RNA methyltransferase RlmN	0	0	0	0	0	0	6.40654	6.2833	6.2878	0	0	0	0	0	6.2878	0	0	0
Q2FZ65	SAOUHSC_01186	PPM-type phosphatase domain-containing protein	7.54407	7.62428	7.67578	7.2833	7.47129	7.13354	7.75282	7.6981	7.6981	7.54158	7.55871	7.52375	7.67943	7.71265	7.67117	7.59106	7.52504	7.57864		catalytic activity			+	1.41403	-1.05858	+	2.95793	-0.581319	+	2.16821	-0.408045
Q2FZ64	SAOUHSC_01187	Non-specific serine/threonine protein kinase	7.86153	7.84942	7.81157	0	7.59415	0	7.90363	7.88081	7.8169	7.60314	7.61909	7.49969	7.70329	7.62941	7.8537	7.75511	7.68842	7.67669		adenyl nucleotide binding;adenyl ribonucleotide binding;ATP binding;binding;carboxylic acid binding;catalytic activity;drug binding;kinase activity;nucleotide binding;penicillin binding;phosphotransferase activity, alcohol group as acceptor;protein kinase activity;purine nucleotide binding;purine ribonucleoside triphosphate binding;purine ribonucleotide binding;ribonucleotide binding;transferase …			+	1.31954	-2.68342	+	2.52315	-0.973796
Q2FZ63	rsgA	Small ribosomal subunit biogenesis GTPase RsgA	6.91487	7.19312	7.21748	0	0	0	6.88536	6.9345	6.72346	0	0	0	7.0607	7.23045	7.0086	0	0	0		binding;catalytic activity;cation binding;GTP binding;GTPase activity;guanyl nucleotide binding;guanyl ribonucleotide binding;hydrolase activity;hydrolase activity, acting on acid anhydrides;hydrolase activity, acting on acid anhydrides, in phosphorus-containing anhydrides;ion binding;metal ion binding;nucleoside-triphosphatase activity;nucleotide binding;purine nucleotide binding;purine ribonucl…						+	1.53624	-0.905192	+	2.90789	-2.86992
Q2FZ62	rpe	Ribulose-phosphate 3-epimerase	7.87216	7.90795	7.89542	7.76641	7.76118	7.83759	7.96895	7.93802	7.95328	7.91275	7.94547	7.91328	7.77525	7.79029	7.85854	7.89653	7.83632	7.86094	alcohol catabolic process;alcohol metabolic process;carbohydrate catabolic process;carbohydrate metabolic process;catabolic process;cellular carbohydrate catabolic process;cellular carbohydrate metabolic process;cellular metabolic process;cellular nitrogen compound metabolic process;cellular process;coenzyme metabolic process;cofactor metabolic process;glucose catabolic process;glucose metabolic …	binding;catalytic activity;cation binding;ion binding;isomerase activity;metal ion binding;racemase and epimerase activity;racemase and epimerase activity, acting on carbohydrates and derivatives;ribulose-phosphate 3-epimerase activity		Carbon fixation in photosynthetic organisms;Pentose and glucuronate interconversions;Pentose phosphate pathway	+	1.74214	-0.343653
Q2FZ61	SAOUHSC_01190	Thiamine diphosphokinase	7.35218	7.42975	7.40824	7.06446	7.32015	7.24551	7.35218	7.35793	7.29003	7.41664	7.43297	7.45637	7.15229	7.2833	7.19312	7.3962	7.38561	7.4216	aromatic compound biosynthetic process;biosynthetic process;cellular aromatic compound metabolic process;cellular biosynthetic process;cellular metabolic process;cellular nitrogen compound biosynthetic process;cellular nitrogen compound metabolic process;cellular process;coenzyme biosynthetic process;coenzyme metabolic process;cofactor biosynthetic process;cofactor metabolic process;heterocycle b…	adenyl nucleotide binding;adenyl ribonucleotide binding;ATP binding;binding;catalytic activity;diphosphotransferase activity;nucleotide binding;purine nucleotide binding;purine ribonucleoside triphosphate binding;purine ribonucleotide binding;ribonucleotide binding;thiamine binding;thiamine diphosphokinase activity;transferase activity;transferase activity, transferring phosphorus-containing grou…						+	1.8434	0.338642	+	2.05392	0.636365
Q2FZ60	rpmB	50S ribosomal protein L28	0	0	0	0	0	0	0	0	6.7997	0	0	0	0	0	0	0	0	0
Q2FZ59	SAOUHSC_01192	Alkaline shock protein 23	8.29447	8.47567	8.39794	8.6053	8.58995	8.67578	8.43457	8.41996	8.50379	8.33041	8.38202	8.32634	8.76864	8.6721	8.65031	8.6053	8.56937	8.63548					+	1.78788	0.778389	+	1.55856	-0.35384	+	1.07138	-0.311022
Q2FZ58	SAOUHSC_01193	Uncharacterized protein SAOUHSC_01193	7.29447	7.25768	7.29003	0	0	0	7.42488	7.37291	7.37107	0	0	6.8293	7.51455	7.48996	7.5302	6.74741	0	0	alcohol metabolic process;alditol metabolic process;carbohydrate metabolic process;cellular carbohydrate metabolic process;cellular metabolic process;cellular process;glycerol metabolic process;metabolic process;polyol metabolic process;primary metabolic process;small molecule metabolic process	catalytic activity;glycerone kinase activity;kinase activity;phosphotransferase activity, alcohol group as acceptor;transferase activity;transferase activity, transferring phosphorus-containing groups			+	1.42372	-2.14433	+	2.4343	-2.62309	+	3.07979	-2.89429
Q2FZ55	plsX	Phosphate acyltransferase	8.22531	8.14613	8.18184	7.61278	7.64836	7.6637	7.81358	7.84261	7.87157	7.68124	7.67025	7.84136	8.52634	8.617	8.49969	8.06446	8.1038	8.02119	biosynthetic process;carboxylic acid biosynthetic process;carboxylic acid metabolic process;cellular biosynthetic process;cellular ketone metabolic process;cellular lipid metabolic process;cellular metabolic process;cellular process;fatty acid biosynthetic process;fatty acid metabolic process;lipid biosynthetic process;lipid metabolic process;metabolic process;monocarboxylic acid metabolic proces…	catalytic activity;oxidoreductase activity;oxidoreductase activity, acting on CH-OH group of donors;oxidoreductase activity, acting on the CH-OH group of donors, NAD or NADP as acceptor;transferase activity;transferase activity, transferring acyl groups;transferase activity, transferring acyl groups other than amino-acyl groups	cell part;cytoplasm;intracellular part	Glycerolipid metabolism;Glycerophospholipid metabolism	+	4.41586	-1.80318				+	3.46052	-1.60956
Q2FZ54	SAOUHSC_01198	Malonyl CoA-acyl carrier protein transacylase	7.31387	7.26717	7.3075	0	0	0	7.20952	7.23553	7.28103	0	7.20434	7.22531	6.97359	7	7.10037	7.11059	7.0569	7.04532		[acyl-carrier-protein] S-malonyltransferase activity;catalytic activity;fatty acid synthase activity;malonyltransferase activity;S-acyltransferase activity;S-malonyltransferase activity;transferase activity;transferase activity, transferring acyl groups;transferase activity, transferring acyl groups other than amino-acyl groups		Fatty acid biosynthesis	+	1.54423	-1.51467
Q2FZ53	SAOUHSC_01199	3-oxoacyl-[acyl-carrier-protein] reductase	5.94336	0	0	0	0	0	0	0	0	0	0	0	0	0	0	0	0	0
Q2FZ51	acpP	Acyl carrier protein	8.23553	8.11394	8.16137	8.04532	8.04922	8.17319	7.92993	7.86923	7.87679	8.02119	8.07918	8.07188	7.78533	7.8014	7.78176	7.96284	7.85914	7.88986		acyl carrier activity;substrate-specific transporter activity;transporter activity	cell part;cytoplasm;intracellular part					+	2.47992	0.549554	+	1.66275	0.380198
Q2FZ50	rnc	Ribonuclease 3	8.95952	8.97864	9.03342	8.74351	8.75815	8.68753	8.70243	8.72016	8.80482	8.97035	8.98	9.01284	8.81954	8.89818	8.83442	8.44091	8.45025	8.45179	catabolic process;cellular catabolic process;cellular macromolecule catabolic process;cellular macromolecule metabolic process;cellular metabolic process;cellular nitrogen compound metabolic process;cellular process;macromolecule catabolic process;macromolecule metabolic process;metabolic process;mRNA metabolic process;mRNA processing;ncRNA catabolic process;ncRNA metabolic process;ncRNA processi…	binding;catalytic activity;cation binding;endonuclease activity;endonuclease activity, active with either ribo- or deoxyribonucleic acids and producing 5'-phosphomonoesters;endoribonuclease activity;endoribonuclease activity, producing 5'-phosphomonoesters;hydrolase activity;hydrolase activity, acting on ester bonds;ion binding;metal ion binding;nuclease activity;nucleic acid binding;ribonuclease…	cell part;cytoplasm;intracellular part	Ribosome biogenesis in eukaryotes	+	2.96782	-0.866343	+	2.70286	0.814732	+	4.10749	-1.33896
Q2FZ49	smc	Chromosome partition protein Smc	8.71433	8.67486	8.57171	8.83696	8.94002	9.02119	8.6981	8.83759	8.8109	8.617	8.71433	8.68931	8.70243	8.57171	8.70501	8.90146	8.85431	8.85552	biosynthetic process;cell cycle process;cellular biosynthetic process;cellular component organization;cellular component organization at cellular level;cellular component organization or biogenesis;cellular component organization or biogenesis at cellular level;cellular macromolecule biosynthetic process;cellular macromolecule metabolic process;cellular metabolic process;cellular nitrogen compoun…	adenyl nucleotide binding;adenyl ribonucleotide binding;ATP binding;binding;DNA binding;nucleic acid binding;nucleotide binding;purine nucleotide binding;purine ribonucleoside triphosphate binding;purine ribonucleotide binding;ribonucleotide binding	cell part;chromosome;cytoplasm;intracellular non-membrane-bounded organelle;intracellular organelle;intracellular part;non-membrane-bounded organelle;organelle		+	1.82569	0.927111				+	1.97077	0.699972
Q2FZ48	ftsY	Signal recognition particle receptor FtsY	0	6.57519	6.62325	7.02531	6.85974	6.62839	6.66839	6.67394	6.61805	6.4609	6.48144	6.44871	6.34635	0	6.49276	0	0	0	cotranslational protein targeting to membrane;establishment of localization;establishment of localization in cell;establishment of protein localization;establishment of protein localization in endoplasmic reticulum;establishment of protein localization to organelle;intracellular protein transport;intracellular transport;protein targeting;protein targeting to ER;protein targeting to membrane;prote…	binding;catalytic activity;GTP binding;GTPase activity;guanyl nucleotide binding;guanyl ribonucleotide binding;hydrolase activity;hydrolase activity, acting on acid anhydrides;hydrolase activity, acting on acid anhydrides, in phosphorus-containing anhydrides;nucleoside-triphosphatase activity;nucleotide binding;purine nucleotide binding;purine ribonucleoside triphosphate binding;purine ribonucleo…	cell part;cytoplasm;intracellular part;intrinsic to membrane;intrinsic to plasma membrane;membrane part;plasma membrane part	Bacterial secretion system;Protein export				+	3.14706	-0.630424
Q2FZ47	SAOUHSC_01206	UPF0122 protein SAOUHSC_01206	6.33646	6.75664	6.7679	0	0	0	7.94694	7.88196	7.8293	0	0	0	7.32838	7.22531	7.24797	7.34242	7.07188	7.0607	biosynthetic process;cellular biosynthetic process;cellular macromolecule metabolic process;cellular metabolic process;cellular nitrogen compound metabolic process;cellular process;macromolecule metabolic process;metabolic process;nitrogen compound metabolic process;nucleic acid metabolic process;nucleobase-containing compound metabolic process;primary metabolic process;RNA biosynthetic process;R…	binding;core DNA-dependent RNA polymerase binding promoter specificity activity;core RNA polymerase binding transcription factor activity;DNA binding;nucleic acid binding;nucleic acid binding transcription factor activity;protein binding transcription factor activity;sequence-specific DNA binding transcription factor activity;sigma factor activity						+	2.77369	-4.30393
Q2FZ46	ffh	Signal recognition particle protein	6.94596	7.01284	7.02938	0	6.97359	7.07555	6.97081	6.96755	6.86923	6.96942	6.97589	6.98543	0	0	0	6.76716	0	6.88649	cotranslational protein targeting to membrane;establishment of localization;establishment of localization in cell;establishment of protein localization;establishment of protein localization in endoplasmic reticulum;establishment of protein localization to organelle;intracellular protein transport;intracellular transport;protein targeting;protein targeting to ER;protein targeting to membrane;prote…	7S RNA binding;binding;catalytic activity;GTP binding;GTPase activity;guanyl nucleotide binding;guanyl ribonucleotide binding;hydrolase activity;hydrolase activity, acting on acid anhydrides;hydrolase activity, acting on acid anhydrides, in phosphorus-containing anhydrides;nucleic acid binding;nucleoside-triphosphatase activity;nucleotide binding;purine nucleotide binding;purine ribonucleoside tr…	cell part;cytoplasmic part;intracellular part;macromolecular complex;ribonucleoprotein complex;signal recognition particle	Bacterial secretion system;Protein export							+	2.46424	2.45142
Q2FZ45	rpsP	30S ribosomal protein S16	0	7.31806	7.40483	0	0	0	0	0	0	0	0	0	0	0	0	0	0	0
Q2FZ44	rimM	Ribosome maturation factor RimM	7.8739	8.01703	8.04532	0	0	0	8.48001	8.34635	8.41162	0	0	0	8.47129	8.36922	8.35411	8.12057	8.22531	8.03743	cellular component biogenesis;cellular component biogenesis at cellular level;cellular component organization or biogenesis;cellular component organization or biogenesis at cellular level;cellular macromolecule metabolic process;cellular metabolic process;cellular nitrogen compound metabolic process;cellular process;macromolecule metabolic process;metabolic process;ncRNA metabolic process;ncRNA p…	binding;ribonucleoprotein binding;ribosome binding	cell part;cytoplasmic part;intracellular non-membrane-bounded organelle;intracellular organelle;intracellular part;macromolecular complex;non-membrane-bounded organelle;organelle;ribonucleoprotein complex;ribosome		+	2.71251	-4.44256	+	4.08242	-6.77705	+	1.8352	-0.898366
Q2FZ43	trmD	tRNA (guanine-N(1)-)-methyltransferase	8.8739	8.84819	8.88024	0	8.08636	7.88196	8.93399	8.90633	8.9652	8.07555	8.10037	7.95665	9.14613	9.23553	9.13988	8.56467	8.5302	8.44405			cell part;cytoplasm;intracellular part		+	1.42696	-4.33316	+	4.32273	-2.9598	+	3.81611	-2.19538
Q2FZ42	rplS	50S ribosomal protein L19	0	7.22469	0	0	0	0	0	0	0	0	0	0	0	0	0	0	0	0
Q2FZ39	SAOUHSC_01214	Ribosome biogenesis GTPase A	7.0607	6.99695	7.28103	7.15534	6.98272	6.95134	6.88252	6.89708	6.8537	7.06819	7.09691	7.06819	6.80414	6.93651	6.83442	6.94694	7.02531	7.10037		binding;GTP binding;guanyl nucleotide binding;guanyl ribonucleotide binding;nucleotide binding;purine nucleotide binding;purine ribonucleoside triphosphate binding;purine ribonucleotide binding;ribonucleotide binding	cell part;cytoplasm;intracellular part					+	3.63393	0.664366	+	1.3015	0.550936
Q2FZ38	rnhB	Ribonuclease HII	7.79657	7.8704	7.85309	7.7364	7.7364	7.79449	7.8202	7.80414	7.75815	7.69636	7.60959	7.5966	7.91487	7.91275	7.90848	7.32222	7.47567	7.29003	catabolic process;cellular catabolic process;cellular macromolecule catabolic process;cellular macromolecule metabolic process;cellular metabolic process;cellular nitrogen compound metabolic process;cellular process;macromolecule catabolic process;macromolecule metabolic process;metabolic process;nitrogen compound metabolic process;nucleic acid metabolic process;nucleobase-containing compound met…	binding;catalytic activity;cation binding;endonuclease activity;endonuclease activity, active with either ribo- or deoxyribonucleic acids and producing 5'-phosphomonoesters;endoribonuclease activity;endoribonuclease activity, producing 5'-phosphomonoesters;hydrolase activity;hydrolase activity, acting on ester bonds;ion binding;manganese ion binding;metal ion binding;nuclease activity;nucleic aci…	cell part;cytoplasm;intracellular part	DNA replication	+	1.33514	-0.279914	+	1.92982	-0.53145	+	3.1795	-1.82505
Q2FZ37	sucC	Succinate--CoA ligase [ADP-forming] subunit beta	7.02119	7.29003	7.25768	0	7.17254	0	6.99211	7.07555	7.15534	7.11059	7.02119	7.04139	7.13354	7.29226	7.34439	6.82151	6.92583	7.00432	acetyl-CoA catabolic process;acetyl-CoA metabolic process;catabolic process;cellular catabolic process;cellular metabolic process;cellular process;coenzyme catabolic process;coenzyme metabolic process;cofactor catabolic process;cofactor metabolic process;metabolic process;tricarboxylic acid cycle	acid-thiol ligase activity;adenyl nucleotide binding;adenyl ribonucleotide binding;ATP binding;binding;catalytic activity;cation binding;CoA-ligase activity;ion binding;ligase activity;ligase activity, forming carbon-sulfur bonds;magnesium ion binding;manganese ion binding;metal ion binding;nucleotide binding;purine nucleotide binding;purine ribonucleoside triphosphate binding;purine ribonucleoti…		C5-Branched dibasic acid metabolism;Carbon fixation pathways in prokaryotes;Citrate cycle (TCA cycle);Propanoate metabolism							+	1.83171	-1.12782
Q2FZ36	sucD	Succinate--CoA ligase [ADP-forming] subunit alpha	0	6.68124	6.78176	0	0	0	7.13354	7.21219	7.17319	0	6.80942	0	7.15229	7.3032	7.23045	7.02119	7.17609	7.05308		acid-thiol ligase activity;adenyl nucleotide binding;adenyl ribonucleotide binding;ATP binding;ATP citrate synthase activity;binding;catalytic activity;CoA-ligase activity;cofactor binding;ligase activity;ligase activity, forming carbon-sulfur bonds;nucleotide binding;purine nucleotide binding;purine ribonucleoside triphosphate binding;purine ribonucleotide binding;ribonucleotide binding;succinat…		C5-Branched dibasic acid metabolism;Carbon fixation pathways in prokaryotes;Citrate cycle (TCA cycle);Propanoate metabolism				+	1.81676	-1.64684	+	1.06188	-0.482316
Q2FZ32	topA	DNA topoisomerase 1	7.92428	7.99255	7.8451	0	0	0	7.90417	7.935	7.98	7.8657	7.85673	7.93702	8.02531	8.13354	8.0569	8.04532	8.01703	8.0086	cellular macromolecule metabolic process;cellular metabolic process;cellular nitrogen compound metabolic process;cellular process;DNA conformation change;DNA metabolic process;DNA topological change;macromolecule metabolic process;metabolic process;nitrogen compound metabolic process;nucleic acid metabolic process;nucleobase-containing compound metabolic process;primary metabolic process	binding;catalytic activity;cation binding;DNA binding;DNA topoisomerase activity;DNA topoisomerase type I activity;ion binding;isomerase activity;magnesium ion binding;metal ion binding;nucleic acid binding	cell part;chromosome;intracellular non-membrane-bounded organelle;intracellular organelle;intracellular part;non-membrane-bounded organelle;organelle		+	2.86318	-3.54304
Q2FZ31	trmFO	Methylenetetrahydrofolate--tRNA-(uracil-5-)-methyltransferase TrmFO	0	0	6.6049	0	0	0	6.73324	0	0	0	0	0	0	0	0	0	0	0
Q2FZ29	hslV	ATP-dependent protease subunit HslV	6.8704	6.98137	7.14613	0	0	0	7.29226	7.16137	7.27416	6.79449	7.00432	7.03743	7.31387	7.4014	7.44248	7.15534	7.21219	7.233	macromolecule metabolic process;metabolic process;primary metabolic process;protein metabolic process;proteolysis;proteolysis involved in cellular protein catabolic process	binding;catalytic activity;cation binding;endopeptidase activity;hydrolase activity;ion binding;metal ion binding;peptidase activity;peptidase activity, acting on L-amino acid peptides;threonine-type endopeptidase activity;threonine-type peptidase activity	cell part;cytoplasmic part;HslUV protease complex;intracellular part;macromolecular complex;proteasome core complex;protein complex		+	1.28164	-1.00857	+	1.58021	-0.987216	+	1.85549	-0.617023
Q2FZ28	hslU	ATP-dependent protease ATPase subunit HslU	0	0	0	0	0	0	0	0	6.31771	0	0	0	0	6.33244	6.34044	0	0	0
Q2FZ27	codY	GTP-sensing transcriptional pleiotropic repressor CodY	0	0	0	0	0	0	0	0	0	0	6.4742	0	0	0	0	0	0	0
Q2FZ25	rpsB	30S ribosomal protein S2	8.59218	8.68124	8.65992	8.28556	8.40654	8.37291	8.37475	8.33846	8.37475	8.57864	8.64147	8.64738	8.24551	8.38917	8.40654	8.25285	8.32222	8.23553	biosynthetic process;cellular biosynthetic process;cellular macromolecule biosynthetic process;cellular macromolecule metabolic process;cellular metabolic process;cellular process;cellular protein metabolic process;macromolecule biosynthetic process;macromolecule metabolic process;metabolic process;primary metabolic process;protein metabolic process;translation	structural constituent of ribosome;structural molecule activity	cell part;intracellular organelle part;intracellular part;macromolecular complex;organelle part;ribonucleoprotein complex;small ribosomal subunit		+	2.52384	-0.961504	+	3.30836	0.863195
Q2FZ23	tsf	Elongation factor Ts	6.08991	6.50106	6.54407	0	6.39048	0	6.51054	6.48572	6.42813	6.56467	6.47712	6.55509	6.49554	6.47276	6.35411	6.38561	6.5172	6.39794
Q2FZ22	pyrH	Uridylate kinase	7.62221	7.51455	7.54283	7.6149	7.59879	7.71684	7.51455	7.4609	7.62737	7.62221	7.71181	7.70157	7.65992	7.66839	7.65992	7.70501	7.58659	7.63548	biosynthetic process;cellular biosynthetic process;cellular metabolic process;cellular nitrogen compound biosynthetic process;cellular nitrogen compound metabolic process;cellular process;CTP biosynthetic process;CTP metabolic process;'de novo' CTP biosynthetic process;heterocycle biosynthetic process;heterocycle metabolic process;metabolic process;nitrogen compound metabolic process;nucleobase-c…	adenyl nucleotide binding;adenyl ribonucleotide binding;ATP binding;binding;catalytic activity;kinase activity;nucleobase-containing compound kinase activity;nucleotide binding;nucleotide kinase activity;phosphotransferase activity, phosphate group as acceptor;purine nucleotide binding;purine ribonucleoside triphosphate binding;purine ribonucleotide binding;ribonucleotide binding;transferase acti…	cell part;cytoplasm;intracellular part	Pyrimidine metabolism				+	1.19714	0.479218
Q2FZ21	frr	Ribosome-recycling factor	0	7.06446	7.04532	0	0	0	0	0	0	0	0	0	0	0	0	0	0	0
Q2FZ20	pnp	Polyribonucleotide nucleotidyltransferase	0	0	0	0	0	0	0	0	0	0	0	0	0	6.1959	0	0	0	0
Q2FZ19	rnj2	Ribonuclease J 2	8.80618	8.83187	8.76641	8.68305	8.68664	8.69636	8.81023	8.85793	8.74429	8.73078	8.69984	8.77232	8.73799	8.78462	8.73719	8.63347	8.54158	8.6053	cellular macromolecule metabolic process;cellular metabolic process;cellular nitrogen compound metabolic process;cellular process;macromolecule metabolic process;metabolic process;mRNA metabolic process;mRNA processing;ncRNA metabolic process;ncRNA processing;nitrogen compound metabolic process;nucleic acid metabolic process;nucleobase-containing compound metabolic process;primary metabolic proce…	5'-3' exonuclease activity;5'-3' exoribonuclease activity;binding;catalytic activity;cation binding;endonuclease activity;endoribonuclease activity;exonuclease activity;exonuclease activity, active with either ribo- or deoxyribonucleic acids and producing 5'-phosphomonoesters;exoribonuclease activity;exoribonuclease activity, producing 5'-phosphomonoesters;hydrolase activity;hydrolase activity, a…	cell part;cytoplasm;intracellular part	RNA degradation	+	2.35692	-0.374739				+	2.15395	-0.530894
Q2FZ18	SAOUHSC_01253	FtsK domain-containing protein	7.65321	7.64836	7.65992	6.98964	0	0	7.68664	7.69108	7.59329	7.49693	7.54531	7.60097	7.62325	7.64345	7.62531	7.48855	7.51851	7.35793	cell cycle;cell division;cellular process;chromosome segregation	adenyl nucleotide binding;adenyl ribonucleotide binding;ATP binding;binding;DNA binding;nucleic acid binding;nucleotide binding;purine nucleotide binding;purine ribonucleoside triphosphate binding;purine ribonucleotide binding;ribonucleotide binding	cell part;integral to membrane;intrinsic to membrane;membrane part		+	2.86101	-2.86194	+	1.17244	-0.362969	+	1.61708	-0.583569
Q2FZ17	SAOUHSC_01254	HTH gntR-type domain-containing protein	0	0	0	0	0	0	6.72673	6.62221	6.71349	0	0	0	6.64048	6.60423	6.60423	6.53908	0	0	biosynthetic process;cellular biosynthetic process;cellular macromolecule biosynthetic process;cellular macromolecule metabolic process;cellular metabolic process;cellular nitrogen compound metabolic process;cellular process;macromolecule biosynthetic process;macromolecule metabolic process;metabolic process;nitrogen compound metabolic process;nucleic acid metabolic process;nucleobase-containing …	binding;DNA binding;nucleic acid binding;nucleic acid binding transcription factor activity;sequence-specific DNA binding transcription factor activity			+	1.77805	2.33302				+	1.23829	-0.950078
Q2FZ16	SAOUHSC_01255	Peptidase_M16_C domain-containing protein	6.86034	6.82413	6.76343	0	0	6.88967	6.68124	6.5611	6.62941	6.8848	6.85854	7.0086	6.66181	6.83569	0	6.8791	6.95665	6.81358		binding;catalytic activity;cation binding;ion binding;metal ion binding						+	2.14632	0.974632
Q2FZ15	SAOUHSC_01256	Uncharacterized protein	7.5682	7.64246	7.68305	7.4014	7.60206	6.8109	7.75587	7.71933	7.66932	7.70757	7.69636	7.6902	7.75128	7.66087	7.79379	7.54407	7.66932	7.63448		binding;catalytic activity;cation binding;ion binding;metal ion binding									+	1.03573	-0.396497
Q2FZ14	SAOUHSC_01257	Uncharacterized protein	7.4133	7.34439	7.32838	0	0	0	7.37291	7.36922	7.32634	0	0	0	6.95472	7	7.0569	7.07188	6.95328	0		catalytic activity;oxidoreductase activity		Biosynthesis of unsaturated fatty acids;Fatty acid biosynthesis	+	1.57217	-1.76127	+	3.34744	-3.33848
Q2FZ13	SAOUHSC_01258	DUF3388 domain-containing protein	7.42325	7.77597	7.69461	8.07918	8.0899	7.78533	7.88309	7.91009	8.0086	7.88196	7.86094	7.80209	8.0899	8.07188	7.98227	8.04532	7.97128	8.02531
Q2FZ12	SAOUHSC_01259	HTH cro/C1-type domain-containing protein	6.91009	6.83187	6.84261	0	0	0	0	0	0	0	0	0	0	0	0	0	0	0
Q2FZ11	SAOUHSC_01260	CDP-diacylglycerol--glycerol-3-phosphate 3-phosphatidyltransferase	7.17026	7.18184	7.19312	7.22531	7.12385	6.97864	7.24797	7.16137	7.16137	7.18469	7.16137	7.27184	7.21484	7.17026	7.20412	7.08636	7.16137	7.08991	biosynthetic process;cellular biosynthetic process;cellular lipid metabolic process;cellular metabolic process;cellular process;lipid biosynthetic process;lipid metabolic process;metabolic process;organophosphate metabolic process;phospholipid biosynthetic process;phospholipid metabolic process;primary metabolic process	catalytic activity;CDP-alcohol phosphatidyltransferase activity;CDP-diacylglycerol-glycerol-3-phosphate 3-phosphatidyltransferase activity;phosphotransferase activity, for other substituted phosphate groups;transferase activity;transferase activity, transferring phosphorus-containing groups	cell part;integral to membrane;intrinsic to membrane;membrane part	Glycerophospholipid metabolism							+	1.40186	-0.278591
Q2FZ10	cinA	Putative competence-damage inducible protein	8.33445	8.38917	8.3075	8.45025	8.51322	8.63749	8.51983	8.52892	8.62941	8.25527	8.34044	8.3075	8.73878	8.62737	8.6902	8.42651	8.35025	8.39445					+	1.468	0.630989	+	2.41342	-0.8581	+	2.78188	-0.980114
Q2FZ09	recA	Protein RecA	7.92634	7.94201	7.8791	0	7.07555	7.2014	7.93197	7.89209	7.87099	7.68842	7.69984	7.76567	7.82282	7.73957	7.84386	7.69285	7.56229	7.67761	cell communication;cellular macromolecule metabolic process;cellular metabolic process;cellular nitrogen compound metabolic process;cellular process;cellular response to external stimulus;cellular response to extracellular stimulus;cellular response to stimulus;cellular response to stress;DNA metabolic process;DNA recombination;DNA repair;macromolecule metabolic process;metabolic process;nitrogen…	adenyl nucleotide binding;adenyl ribonucleotide binding;ATP binding;ATPase activity;ATPase activity, coupled;binding;catalytic activity;damaged DNA binding;DNA binding;DNA-dependent ATPase activity;hydrolase activity;hydrolase activity, acting on acid anhydrides;hydrolase activity, acting on acid anhydrides, in phosphorus-containing anhydrides;nucleic acid binding;nucleoside-triphosphatase activi…	cell part;cytoplasm;intracellular part	Homologous recombination	+	4.2314	-2.53908	+	2.41493	-0.59919	+	1.41165	-0.524314
Q2FZ08	rny	Ribonuclease Y	8.40993	8.4014	8.41162	8.2878	8.2878	8.39093	8.51851	8.45939	8.44248	8.34439	8.45332	8.45637	8.48855	8.45637	8.48714	8.39093	8.38739	8.36922	catabolic process;cellular catabolic process;cellular macromolecule catabolic process;cellular macromolecule metabolic process;cellular metabolic process;cellular nitrogen compound metabolic process;cellular process;macromolecule catabolic process;macromolecule metabolic process;metabolic process;mRNA catabolic process;mRNA metabolic process;multi-organism process;nitrogen compound metabolic proc…	binding;catalytic activity;endonuclease activity;endoribonuclease activity;hydrolase activity;hydrolase activity, acting on ester bonds;nuclease activity;nucleic acid binding;ribonuclease activity;RNA binding	cell part;integral to membrane;intrinsic to membrane;membrane;membrane part;plasma membrane								+	2.79469	-0.315045
Q2FZ07	SAOUHSC_01264	Uncharacterized protein	6.22191	0	0	0	0	0	6.2619	0	0	0	0	0	6.17609	6.14301	6.0607	0	0	0
Q2FZ06	SAOUHSC_01265	Uncharacterized protein	7.07188	7.02119	7.1038	6.9987	6.84572	7.12057	7.00432	6.86747	7.0569	6.88252	6.93247	6.93702	6.92891	6.97497	6.85309	6.81624	6.95809	6.90146
Q2FZ04	SAOUHSC_01267	Uncharacterized protein	0	0	0	0	0	0	0	0	0	0	0	0	0	0	6.60853	6.3032	0	0
Q2FZ03	SAOUHSC_01268	Thiamine_BP domain-containing protein	0	0	0	0	0	0	6.54158	6.41497	0	0	0	0	6.76418	6.73159	6.67486	0	0	0
Q2FZ02	miaB	tRNA-2-methylthio-N(6)-dimethylallyladenosine synthase	0	0	0	0	0	0	6.19521	0	0	0	0	0	0	0	0	0	0	0
Q2FYZ9	mutS	DNA mismatch repair protein MutS	7.93349	7.94349	8.01284	7.13988	7.68842	7.21748	7.55751	7.48996	7.57287	7.56937	7.47712	7.68305	7.49969	7.57519	7.65128	0	0	0	cellular macromolecule metabolic process;cellular metabolic process;cellular nitrogen compound metabolic process;cellular process;cellular response to stimulus;cellular response to stress;DNA metabolic process;DNA repair;macromolecule metabolic process;metabolic process;mismatch repair;nitrogen compound metabolic process;nucleic acid metabolic process;nucleobase-containing compound metabolic proc…	adenyl nucleotide binding;adenyl ribonucleotide binding;ATP binding;binding;damaged DNA binding;DNA binding;double-stranded DNA binding;mismatched DNA binding;nucleic acid binding;nucleotide binding;purine nucleotide binding;purine ribonucleoside triphosphate binding;purine ribonucleotide binding;ribonucleotide binding;structure-specific DNA binding		Mismatch repair	+	1.62312	-2.04192				+	2.03052	-4.1334
Q2FYZ7	SAOUHSC_01274	Glycerol uptake operon antiterminator regulatory protein	7.41996	7.44404	7.54407	0	7.14073	0	7.16435	7.1271	7.19312	7.24797	7.27184	7.32015	7.25285	7.27184	7.26245	7.04139	7.14922	7.08279	alcohol metabolic process;alditol metabolic process;biological regulation;biosynthetic process;carbohydrate metabolic process;cellular biosynthetic process;cellular carbohydrate metabolic process;cellular macromolecule biosynthetic process;cellular macromolecule metabolic process;cellular metabolic process;cellular nitrogen compound metabolic process;cellular process;glycerol metabolic process;ma…	binding;nucleic acid binding;RNA binding			+	1.83244	-2.05566	+	1.84489	0.393514	+	2.23651	-0.568878
Q2FYZ6	SAOUHSC_01275	Uncharacterized protein	6.94792	7.06446	7.06819	0	6.87564	6.89542	6.94743	6.92376	6.92634	6.97681	6.89542	6.96284	6.88309	6.90687	6.87679	6.79309	6.83569	0
Q2FYZ5	glpK	Glycerol kinase	0	0	0	0	0	0	0	6.18401	0	0	0	0	0	0	6.11059	0	0	0
Q2FYZ4	glpD	Aerobic glycerol-3-phosphate dehydrogenase	8.233	8.19033	8.15229	7.53529	8.0086	8.0569	8.30103	8.24551	8.27646	8.04532	8.0899	8.15534	7.98	8.02531	7.96942	8.11727	8.14613	8.11059	alcohol catabolic process;alcohol metabolic process;alditol catabolic process;alditol metabolic process;carbohydrate catabolic process;carbohydrate metabolic process;catabolic process;cellular carbohydrate catabolic process;cellular carbohydrate metabolic process;cellular metabolic process;cellular process;glycerol catabolic process;glycerol metabolic process;glycerol-3-phosphate metabolic proces…	catalytic activity;glycerol-3-phosphate dehydrogenase activity;oxidoreductase activity;oxidoreductase activity, acting on CH-OH group of donors;oxidoreductase activity, acting on the CH-OH group of donors, quinone or similar compound as acceptor;sn-glycerol-3-phosphate:ubiquinone oxidoreductase activity;sn-glycerol-3-phosphate:ubiquinone-8 oxidoreductase activity	cell part;cytoplasmic part;glycerol-3-phosphate dehydrogenase complex;intracellular part;macromolecular complex;protein complex	Glycerophospholipid metabolism				+	2.11421	-0.589576	+	2.55178	0.442109
Q2FYZ3	SAOUHSC_01279	Hydrolase, alpha/beta fold family domain protein	8.5563	8.4843	8.5092	8.12057	8.24797	8.25527	8.31175	8.30963	8.27875	8.45179	8.50786	8.53403	8.35603	8.41162	8.4183	8.34635	8.34242	8.35984		catalytic activity;hydrolase activity			+	2.50304	-1.02535	+	2.7645	0.657222	+	1.05275	-0.152074
Q2FYZ1	hfq	RNA-binding protein Hfq	8.98318	8.96142	9.00432	8.88138	8.81624	8.99123	8.65225	8.67394	8.70501	8.47276	8.46538	8.48572	8.57403	8.55267	8.51322	8.49554	8.48572	8.47857	biological regulation;regulation of biological process;regulation of biosynthetic process;regulation of cellular biosynthetic process;regulation of cellular macromolecule biosynthetic process;regulation of cellular metabolic process;regulation of cellular process;regulation of gene expression;regulation of macromolecule biosynthetic process;regulation of macromolecule metabolic process;regulation…	binding;nucleic acid binding;RNA binding		RNA degradation				+	3.60394	-0.672508	+	1.50272	-0.199409
Q2FYZ0	SAOUHSC_01282	Glutathione peroxidase	8.22531	8.22789	8.20951	7.83378	7.94645	8.1959	8.23553	8.2014	8.16137	8.03342	8.1038	8.09691	8.03743	7.95231	8.11394	8.0899	8.04532	8.02938	response to chemical stimulus;response to oxidative stress;response to stimulus;response to stress	antioxidant activity;catalytic activity;glutathione peroxidase activity;oxidoreductase activity;oxidoreductase activity, acting on peroxide as acceptor;peroxidase activity		Arachidonic acid metabolism;Glutathione metabolism				+	1.76166	-0.403233
Q2FYY8	SAOUHSC_01284	Uncharacterized protein	9.39093	9.33846	9.30963	9.19866	9.18752	8.94101	9.09691	9.07918	9.13033	9.38021	9.45637	9.4216	8.9425	9.0607	9.03342	8.72263	8.83315	8.83378		binding;catalytic activity;cofactor binding;pyridoxal phosphate binding;vitamin B6 binding;vitamin binding			+	1.27366	-0.788216	+	3.54581	1.05389	+	1.86222	-0.716497
Q2FYY6	SAOUHSC_01287	Glutamine synthetase	8.97497	8.86153	8.93601	9.10037	9.07918	9.07555	9.04532	8.93752	8.89927	9.0607	9.04139	9.03342	8.82607	8.79099	8.76641	8.85309	8.7796	8.85187	amine biosynthetic process;amine metabolic process;biosynthetic process;carboxylic acid biosynthetic process;carboxylic acid metabolic process;cellular amine metabolic process;cellular amino acid biosynthetic process;cellular amino acid metabolic process;cellular biosynthetic process;cellular ketone metabolic process;cellular metabolic process;cellular nitrogen compound biosynthetic process;cellu…	acid-ammonia (or amide) ligase activity;adenyl nucleotide binding;adenyl ribonucleotide binding;ammonia ligase activity;ATP binding;binding;catalytic activity;glutamate-ammonia ligase activity;ligase activity;ligase activity, forming carbon-nitrogen bonds;nucleotide binding;purine nucleotide binding;purine ribonucleoside triphosphate binding;purine ribonucleotide binding;ribonucleotide binding	cell part;cytoplasm;intracellular part	Alanine, aspartate and glutamate metabolism;Arginine and proline metabolism;Nitrogen metabolism;Two-component system	+	2.03378	0.534367
Q2FYW9	SAOUHSC_01304	Uncharacterized protein	8.63849	8.52892	8.57171	8.40993	8.44871	8.35411	8.46389	8.3784	8.35025	8.50379	8.48996	8.56348	8.39794	8.46835	8.38202	8.42813	8.39794	8.42813					+	1.85293	-0.582851	+	1.38524	0.403826
Q2FYW6	SAOUHSC_01307	Beta_elim_lyase domain-containing protein	7.96661	7.86451	7.92737	7.72916	7.79796	7.85187	7.78247	7.79169	7.74272	7.8704	7.88309	7.94201	7.86629	7.89432	7.86688	7.77085	7.71096	7.76641	amine metabolic process;carboxylic acid metabolic process;cellular amine metabolic process;cellular amino acid metabolic process;cellular ketone metabolic process;cellular metabolic process;cellular nitrogen compound metabolic process;cellular process;metabolic process;nitrogen compound metabolic process;organic acid metabolic process;oxoacid metabolic process;primary metabolic process;small mole…	binding;catalytic activity;cofactor binding;lyase activity;pyridoxal phosphate binding;vitamin B6 binding;vitamin binding		Glycine, serine and threonine metabolism	+	1.2809	-0.420222	+	2.04036	0.419247	+	2.38841	-0.41995
Q2FYW4	SAOUHSC_01310	Cardiolipin synthase	0	0	0	0	0	0	0	0	0	0	0	0	0	6.78888	0	0	0	0
Q2FYV8	SAOUHSC_01316	Micrococcal nuclease	7.80618	7.77232	7.78319	7.80889	7.76118	7.6637	7.66276	7.60206	7.63949	7.68305	7.67761	7.71012	7.65128	7.63749	7.68574	7.60097	7.64542	7.64246		binding;catalytic activity;hydrolase activity;hydrolase activity, acting on ester bonds;nuclease activity;nucleic acid binding						+	1.27954	0.184331
Q2FYV7	SAOUHSC_01317	Uncharacterized protein	7.22789	7.18752	7.27416	0	0	0	7.37107	7.24551	7.25768	0	0	0	7.14922	7.07188	7.07555	0	0	0					+	2.69449	-1.19974	+	2.69306	-3.29728	+	4.13811	-2.98045
Q2FYV4	SAOUHSC_01320	Homoserine dehydrogenase	7.62014	7.52892	7.62737	0	7.29226	7.29003	7.48855	7.41664	7.40824	7.36736	7.32634	7.29226	7.86332	7.94448	7.6721	7.70586	7.60746	7.617	amine biosynthetic process;amine metabolic process;aspartate family amino acid biosynthetic process;aspartate family amino acid metabolic process;biosynthetic process;branched chain family amino acid biosynthetic process;branched chain family amino acid metabolic process;carboxylic acid biosynthetic process;carboxylic acid metabolic process;cellular amine metabolic process;cellular amino acid bio…	binding;catalytic activity;coenzyme binding;cofactor binding;homoserine dehydrogenase activity;NADP binding;nucleotide binding;oxidoreductase activity;oxidoreductase activity, acting on CH-OH group of donors;oxidoreductase activity, acting on the CH-OH group of donors, NAD or NADP as acceptor		Cysteine and methionine metabolism;Glycine, serine and threonine metabolism;Lysine biosynthesis	+	1.39362	-1.48579	+	1.50773	-0.362625
Q2FYV3	SAOUHSC_01321	Threonine synthase	8.04532	8.06819	8.0899	7.88138	7.89154	7.68034	7.94101	7.88366	7.85003	8.05308	8.07188	8.10721	8.07918	8.21748	8.03342	8.17026	8.15229	8.13354	amine biosynthetic process;amine metabolic process;aspartate family amino acid biosynthetic process;aspartate family amino acid metabolic process;biosynthetic process;carboxylic acid biosynthetic process;carboxylic acid metabolic process;cellular amine metabolic process;cellular amino acid biosynthetic process;cellular amino acid metabolic process;cellular biosynthetic process;cellular ketone met…	binding;carbon-oxygen lyase activity;carbon-oxygen lyase activity, acting on phosphates;catalytic activity;cofactor binding;lyase activity;pyridoxal phosphate binding;threonine synthase activity;vitamin B6 binding;vitamin binding		Glycine, serine and threonine metabolism;Vitamin B6 metabolism	+	1.63277	-0.830655	+	2.4125	0.617282
Q2FYV1	SAOUHSC_01323	Uncharacterized protein	0	0	0	0	0	0	0	0	0	5.37363	0	0	0	0	0	0	0	0
Q2FYV0	SAOUHSC_01324	Uncharacterized protein	7.95085	7.91645	7.98363	0	7.85187	7.73799	7.93095	7.92788	7.70757	7.84073	7.8848	7.86034	7.7574	7.70757	7.72997	7.7007	7.73239	7.72673
Q2FYU8	SAOUHSC_01326	AA_permease domain-containing protein	9.0569	8.83442	8.77232	8.8109	8.87099	8.98811	9.02938	8.96567	8.91751	8.87099	8.90472	8.8848	8.89432	8.8109	8.86688	8.75128	8.60423	8.6981		active transmembrane transporter activity;amine transmembrane transporter activity;amino acid transmembrane transporter activity;carboxylic acid transmembrane transporter activity;organic acid transmembrane transporter activity;substrate-specific transmembrane transporter activity;substrate-specific transporter activity;transmembrane transporter activity;transporter activity	cell part;integral to membrane;intrinsic to membrane;membrane part					+	1.16725	-0.279111	+	1.60047	-0.574131
Q2FYU7	katA	Catalase	0	0	0	0	0	6.77147	0	0	0	0	0	0	0	0	0	0	0	0
Q2FYU6	rpmG1	50S ribosomal protein L33 1	0	7.03973	0	7.09691	7.02531	6.97864	0	0	6.91523	6.93902	7.02531	7.02938	0	0	6.76641	0	0	0
Q2FYU5	rpsN	30S ribosomal protein S14	9.0899	8.92788	9.09342	8.98182	8.97128	9.08636	8.55991	8.60314	8.62428	8.91009	8.91009	8.91169	8.26717	8.29003	8.26007	8.44091	8.48996	8.4609	biosynthetic process;cellular biosynthetic process;cellular macromolecule biosynthetic process;cellular macromolecule metabolic process;cellular metabolic process;cellular process;cellular protein metabolic process;macromolecule biosynthetic process;macromolecule metabolic process;metabolic process;primary metabolic process;protein metabolic process;translation	binding;nucleic acid binding;RNA binding;rRNA binding;structural constituent of ribosome;structural molecule activity	cell part;cytoplasmic part;intracellular non-membrane-bounded organelle;intracellular organelle;intracellular part;macromolecular complex;non-membrane-bounded organelle;organelle;ribonucleoprotein complex;ribosome	Ribosome				+	4.11399	1.0459	+	3.46448	0.636136
Q2FYU4	guaC	GMP reductase	7.83187	7.83885	7.85733	7.65706	7.76938	7.4216	7.84696	7.80346	7.79449	7.70927	7.7796	7.71265	7.76492	7.77305	7.7679	7.69108	7.7356	7.77452	cellular metabolic process;cellular nitrogen compound metabolic process;cellular process;heterocycle metabolic process;metabolic process;nitrogen compound metabolic process;nucleobase-containing compound metabolic process;nucleobase-containing small molecule metabolic process;nucleoside phosphate metabolic process;nucleotide metabolic process;primary metabolic process;purine nucleotide metabolic …	catalytic activity;GMP reductase activity;oxidoreductase activity;oxidoreductase activity, acting on NADH or NADPH;oxidoreductase activity, acting on NADH or NADPH, nitrogenous group as acceptor		Purine metabolism				+	1.35193	-0.269501
Q2FYU2	SAOUHSC_01332	Uncharacterized protein	7.06547	0	0	0	0	0	0	0	0	0	0	0	0	0	0	0	0	0
Q2FYU1	lexA	LexA repressor	7.51983	7.54531	7.5563	0	0	0	7.29885	7.26482	7.33041	7.4456	7.49969	7.41497	7.39967	7.45025	7.35984	7.33244	7.30963	7.23045	biological regulation;biosynthetic process;cell communication;cellular biosynthetic process;cellular macromolecule biosynthetic process;cellular macromolecule metabolic process;cellular metabolic process;cellular nitrogen compound metabolic process;cellular process;cellular response to external stimulus;cellular response to extracellular stimulus;cellular response to stimulus;cellular response to…	binding;catalytic activity;DNA binding;endopeptidase activity;hydrolase activity;nucleic acid binding;peptidase activity;peptidase activity, acting on L-amino acid peptides;serine hydrolase activity;serine-type endopeptidase activity;serine-type peptidase activity			+	4.49904	-3.18487	+	2.1206	0.516205	+	1.30095	-0.37343
Q2FYT9	SAOUHSC_01336	UPF0291 protein SAOUHSC_01336	7.78958	7.65418	7.67025	7.9284	7.83885	0	7.37291	7.34635	7.33846	0	7.20919	7.41162	6.9248	7.17609	7.57054	6.84261	6.99739	7.39967
Q2FYT8	SAOUHSC_01337	Transketolase	0	6.67302	6.76268	0	0	0	6.68842	6.74115	6.70757	6.65321	6.66652	6.71096	6.65128	6.75664	6.56348	6.73078	0	6.79518
Q2FYT7	SAOUHSC_01338	UPF0154 protein SAOUHSC_01338	9.9652	9.92737	9.87564	10.1139	10.1004	9.92583	10.2304	10.2765	10.2279	10.1072	10.1614	10.0374	10.3054	10.1903	10.2765	10.2856	10.2304	10.2227			cell part;integral to membrane;intrinsic to membrane;membrane;membrane part;plasma membrane					+	1.66096	-0.474808
Q2FYT3	sbcC	Nuclease SbcCD subunit C	8.72099	8.72835	8.81291	8.63347	8.62634	8.75967	8.49969	8.50786	8.49415	8.57054	8.549	8.56348	8.45484	8.48855	8.44716	8.32838	8.32428	8.3483	biosynthetic process;cell communication;cellular biosynthetic process;cellular macromolecule biosynthetic process;cellular macromolecule metabolic process;cellular metabolic process;cellular nitrogen compound metabolic process;cellular process;cellular response to external stimulus;cellular response to extracellular stimulus;cellular response to stimulus;cellular response to stress;DNA metabolic …	adenyl nucleotide binding;adenyl ribonucleotide binding;ATP binding;binding;catalytic activity;endonuclease activity;exonuclease activity;hydrolase activity;hydrolase activity, acting on ester bonds;nuclease activity;nucleotide binding;purine nucleotide binding;purine ribonucleoside triphosphate binding;purine ribonucleotide binding;ribonucleotide binding						+	2.89357	0.200788	+	3.04064	-0.431393
Q2FYT0	SAOUHSC_01346	Glycine betaine transporter, putative	8.22531	8.2014	8.17319	8.08279	8.02531	8.07918	8.06446	8.12385	8.07555	8.12385	8.04139	8.06446	7.85673	7.9058	7.90091	7.91275	7.87737	7.8293		transporter activity	cell part;integral to membrane;intrinsic to membrane;membrane;membrane part;plasma membrane		+	2.34301	-0.456899
Q2FYS9	SAOUHSC_01347	Aconitate hydratase	7.99255	7.88366	7.85733	7.88423	7.79865	8.02119	7.82282	7.82413	7.77232	7.83948	7.94939	7.902	7.59329	7.63144	7.60531	7.74819	7.78104	7.76716		4 iron, 4 sulfur cluster binding;aconitate hydratase activity;binding;carbon-oxygen lyase activity;catalytic activity;hydro-lyase activity;iron-sulfur cluster binding;lyase activity;metal cluster binding		Carbon fixation pathways in prokaryotes;Citrate cycle (TCA cycle);Glyoxylate and dicarboxylate metabolism				+	1.17876	0.300748	+	3.33886	0.51639
Q2FYS8	SAOUHSC_01348	4HBT domain-containing protein	8.32015	8.34044	8.33846	8.27416	8.23045	8.3962	8.30535	8.2878	8.26245	8.233	8.25285	8.25527	8.22011	8.25768	8.27416	8.1271	8.16435	8.16137		catalytic activity;hydrolase activity						+	1.25158	-0.126767	+	2.12367	-0.331217
Q2FYS7	SAOUHSC_01349	Uncharacterized protein SAOUHSC_01349	7.5682	7.5092	7.53148	7.51188	7.51983	0	7.65418	7.60746	7.48996	7.59329	7.62428	7.61384	7.68215	7.73078	7.55871	7.61066	7.64246	7.57403
Q2FYS6	plsY	Glycerol-3-phosphate acyltransferase	8.35025	8.29447	8.26245	0	0	0	7.85552	7.84757	7.83506	0	0	0	7.13033	7.15229	0	0	0	0	biosynthetic process;cellular biosynthetic process;cellular lipid metabolic process;cellular metabolic process;cellular process;lipid biosynthetic process;lipid metabolic process;metabolic process;organophosphate metabolic process;phospholipid biosynthetic process;phospholipid metabolic process;primary metabolic process	acyl-phosphate glycerol-3-phosphate acyltransferase activity;catalytic activity;transferase activity;transferase activity, transferring acyl groups;transferase activity, transferring acyl groups other than amino-acyl groups	cell part;integral to membrane;intrinsic to membrane;membrane;membrane part;plasma membrane	Glycerolipid metabolism;Glycerophospholipid metabolism	+	3.26311	-4.92285	+	5.56569	-5.59164
Q2FYS5	parE	DNA topoisomerase 4 subunit B	0	0	0	0	0	0	0	0	0	0	0	6.22531	0	0	0	0	0	0
Q2FYS4	parC	DNA topoisomerase 4 subunit A	0	6.70842	6.69984	0	0	6.75632	0	0	0	0	0	0	6.67761	6.734	6.45179	0	0	0
Q2FYS0	SAOUHSC_01365	Uncharacterized protein	0	0	6.1848	0	0	0	0	0	0	0	0	0	0	0	0	0	0	0
Q2FYR2	femA	Aminoacyltransferase FemA	7.4183	7.43933	7.43933	6.97035	7.10037	7.3032	7.37107	7.37658	7.33646	7.28103	7.25768	7.38202	7.14301	7.26717	7.29885	7.27875	7.25527	7.27875	amine metabolic process;aminoglycan biosynthetic process;aminoglycan metabolic process;biological regulation;biosynthetic process;carbohydrate biosynthetic process;carbohydrate metabolic process;cell wall macromolecule biosynthetic process;cell wall macromolecule metabolic process;cell wall organization;cell wall organization or biogenesis;cellular biosynthetic process;cellular cell wall macromol…	binding;catalytic activity;nucleotide binding;transferase activity;transferase activity, transferring acyl groups;transferase activity, transferring amino-acyl groups	cell part;cytoplasm;intracellular part	Peptidoglycan biosynthesis	+	1.46979	-1.02211
Q2FYR1	femB	Aminoacyltransferase FemB	7.21219	7.18469	7.18752	0	0	0	7.26951	7.26245	7.20412	7.16435	7.08991	7.19866	7.32222	7.32838	7.46982	6.96332	0	0	amine metabolic process;aminoglycan biosynthetic process;aminoglycan metabolic process;biological regulation;biosynthetic process;carbohydrate biosynthetic process;carbohydrate metabolic process;cell wall macromolecule biosynthetic process;cell wall macromolecule metabolic process;cell wall organization;cell wall organization or biogenesis;cellular biosynthetic process;cellular cell wall macromol…	catalytic activity;transferase activity;transferase activity, transferring acyl groups;transferase activity, transferring amino-acyl groups	cell part;cytoplasm;intracellular part	Peptidoglycan biosynthesis	+	1.27001	-1.37104	+	1.16173	-0.313555	+	1.49095	-2.05846
Q2FYQ9	SAOUHSC_01376	SWIM-type domain-containing protein	7.26717	7.20412	7.18184	7.16435	7.21219	7.25527	7.27646	7.18469	7.16435	7.17898	7.27184	7.21748	7.0086	6.9722	6.89818	7.03743	7.06446	7.16137		binding;cation binding;ion binding;metal ion binding;transition metal ion binding;zinc ion binding									+	1.21083	0.425508
Q2FYQ3	SAOUHSC_01382	Uncharacterized protein	7.3927	7.36922	7.4183	7.01703	7.29447	7.23805	7.56229	7.51188	7.54033	7.35984	7.34635	7.3962	7.51054	7.5302	7.63949	7.32015	7.36549	7.3962								+	2.91679	-0.567072	+	1.91729	-0.662611
Q2FYQ2	SAOUHSC_01383	Uncharacterized protein	7.59329	7.57519	7.58771	7.49276	7.47712	7.5682	7.5611	7.55991	7.41664	7.56585	7.57171	7.55509	7.48144	7.56467	7.48001	7.45484	7.43616	7.27875
Q2FYP3	cvfB	Conserved virulence factor B	7.23045	0	7.13354	7.34635	7.32428	7.18469	6.95037	6.92942	6.98811	7.11394	7.26717	7.16435	7.07918	7.1038	6.99078	7.03743	7.24055	7.07555	multi-organism process;pathogenesis							+	2.02507	0.750281
Q2FYP2	SAOUHSC_01392	ABC transporter, ATP-binding protein, putative	7.45788	7.3075	7.3927	7.25768	7.33846	7.51983	7.1959	7.08636	7.11394	7.01703	7.14301	7.20952	6.99782	0	7.08279	6.91698	6.96237	6.96142
Q2FYP0	asd	Aspartate-semialdehyde dehydrogenase	8.51054	8.3483	8.41497	7.99957	8.30963	8.27875	8.45484	8.32015	8.32634	8.29003	8.40993	8.40993	8.2833	8.21484	8.25285	8.26245	8.29447	8.29447
Q2FYN7	dapH	2,3,4,5-tetrahydropyridine-2,6-dicarboxylate N-acetyltransferase	7.63246	7.55871	7.63246	7.71933	7.7574	7.55871	7.57978	7.53529	7.48996	7.68574	7.7767	7.78176	7.45939	7.38021	7.40824	7.57287	7.55145	7.60097	amine biosynthetic process;amine metabolic process;aspartate family amino acid biosynthetic process;aspartate family amino acid metabolic process;biosynthetic process;carboxylic acid biosynthetic process;carboxylic acid metabolic process;cellular amine metabolic process;cellular amino acid biosynthetic process;cellular amino acid metabolic process;cellular biosynthetic process;cellular ketone met…	acetyltransferase activity;catalytic activity;N-acetyltransferase activity;N-acyltransferase activity;tetrahydrodipicolinate N-acetyltransferase activity;transferase activity;transferase activity, transferring acyl groups;transferase activity, transferring acyl groups other than amino-acyl groups		Lysine biosynthesis				+	2.20144	0.70775	+	2.36766	0.528686
Q2FYN4	lysA	Diaminopimelate decarboxylase	8.09342	7.96802	8.05308	7.78462	7.85914	7.73159	7.72016	7.67025	7.58092	7.87157	7.99826	7.95999	7.54654	7.58546	7.56467	7.31175	7.41996	7.36549	amine biosynthetic process;amine metabolic process;aspartate family amino acid biosynthetic process;aspartate family amino acid metabolic process;biosynthetic process;carboxylic acid biosynthetic process;carboxylic acid metabolic process;cellular amine metabolic process;cellular amino acid biosynthetic process;cellular amino acid metabolic process;cellular biosynthetic process;cellular ketone met…	binding;carbon-carbon lyase activity;carboxy-lyase activity;catalytic activity;cofactor binding;diaminopimelate decarboxylase activity;lyase activity;pyridoxal phosphate binding;vitamin B6 binding;vitamin binding		Lysine biosynthesis	+	2.03487	-0.818491	+	2.17649	0.950621	+	2.41599	-0.663801
Q2FYN2	cspA	Cold shock protein CspA	7.47567	7.32222	7.37475	7.44716	7.50243	7.3032	7.549	7.44404	7.43616	7.3927	7.52114	7.45637	7.42651	7.3032	7.25527	7.30963	7.34044	7.36736
Q2FYN0	SAOUHSC_01405	Uncharacterized protein	0	0	0	0	0	0	6.60417	0	0	0	0	0	0	0	0	0	0	0
Q2FYM9	acyP	Acylphosphatase	7.45637	7.33846	7.3927	7.26717	7.35025	7.3927	7.36361	7.25768	7.27416	7.35793	7.39967	7.38202	7.33041	7.4216	7.22789	7.26245	7.31806	7.27646
Q2FYM7	SAOUHSC_01408	TelA-like protein SAOUHSC_01408	7.62221	7.63849	7.69548	7.549	7.61172	7.08636	7.63144	7.63749	7.549	7.63548	7.63749	7.66558	7.61172	7.60097	7.66932	7.55751	7.49136	7.56937											+	1.27917	-0.292075
Q2FYM4	SAOUHSC_01411	Putative branched-chain amino acid carrier protein SAOUHSC_01411	0	0	0	0	0	0	0	0	0	0	0	5.96379	0	0	0	0	0	0
Q2FYM3	SAOUHSC_01415	VOC domain-containing protein	8.50515	8.39967	8.45788	8.27184	8.30535	8.1271	8.51587	8.46538	8.42488	8.34044	8.35025	8.28556	8.34242	8.35218	8.24551	8.29885	8.25285	8.28556					+	1.60566	-0.729061	+	1.9065	-0.47602
Q2FYM2	odhB	Dihydrolipoyllysine-residue succinyltransferase component of 2-oxoglutarate dehydrogenase complex	8.27646	8.15534	8.22272	8.23805	8.17609	8.15836	8.06446	8.07918	8.04139	8.0569	8.11059	8.09342	8.00432	7.98227	8.0086	7.92891	7.82737	7.90956	acetyl-CoA catabolic process;acetyl-CoA metabolic process;amine catabolic process;amine metabolic process;aspartate family amino acid catabolic process;aspartate family amino acid metabolic process;carboxylic acid catabolic process;carboxylic acid metabolic process;catabolic process;cellular amine metabolic process;cellular amino acid catabolic process;cellular amino acid metabolic process;cellul…	catalytic activity;dihydrolipoyllysine-residue succinyltransferase activity;S-acyltransferase activity;S-succinyltransferase activity;succinyltransferase activity;transferase activity;transferase activity, transferring acyl groups;transferase activity, transferring acyl groups other than amino-acyl groups	cell part;intracellular part;macromolecular complex;oxoglutarate dehydrogenase complex;protein complex	Citrate cycle (TCA cycle);Lysine degradation							+	1.56896	-0.364703
Q2FYM1	odhA	2-oxoglutarate dehydrogenase E1 component	6.41667	0	0	0	0	0	6.55388	0	6.5832	0	6.71725	6.66745	6.81291	6.71767	6.71517	6.68753	0	6.68395	acetyl-CoA catabolic process;acetyl-CoA metabolic process;alcohol catabolic process;alcohol metabolic process;carbohydrate catabolic process;carbohydrate metabolic process;catabolic process;cellular carbohydrate catabolic process;cellular carbohydrate metabolic process;cellular catabolic process;cellular metabolic process;cellular process;coenzyme catabolic process;coenzyme metabolic process;cofa…	binding;catalytic activity;coenzyme binding;cofactor binding;oxidoreductase activity;oxidoreductase activity, acting on the aldehyde or oxo group of donors;oxidoreductase activity, acting on the aldehyde or oxo group of donors, disulfide as acceptor;oxoglutarate dehydrogenase (succinyl-transferring) activity;thiamine pyrophosphate binding;vitamin binding		Citrate cycle (TCA cycle);Lysine degradation;Tryptophan metabolism				+	1.78485	0.533766
Q2FYL5	murG	UDP-N-acetylglucosamine--N-acetylmuramyl-(pentapeptide) pyrophosphoryl-undecaprenol N-acetylglucosamine transferase	7.69984	7.72754	7.69897	0	0	0	7.19312	7.21219	7.2878	0	0	7.27875	0	6.98182	0	7.23553	0	7.08991	alcohol biosynthetic process;alcohol metabolic process;amine metabolic process;amino sugar biosynthetic process;amino sugar metabolic process;aminoglycan biosynthetic process;aminoglycan metabolic process;biological regulation;biosynthetic process;carbohydrate biosynthetic process;carbohydrate metabolic process;cell cycle;cell division;cell wall macromolecule biosynthetic process;cell wall macrom…	acetylglucosaminyltransferase activity;binding;carbohydrate binding;catalytic activity;transferase activity;transferase activity, transferring glycosyl groups;transferase activity, transferring hexosyl groups;UDP-glycosyltransferase activity;UDP-N-acetyl-D-glucosamine:N-acetylmuramoyl-L-alanyl-D-glutamyl-meso-2,6-diaminopimelyl-D-alanyl-D-alanine-diphosphoundecaprenol 4-beta-N-acetylglucosaminlyt…	cell part;membrane;plasma membrane	Cell cycle - Caulobacter;Peptidoglycan biosynthesis	+	2.57026	-2.83904
Q2FYL4	SAOUHSC_01425	N-acetyltransferase domain-containing protein	6.95328	6.93146	6.95904	0	0	0	7.23045	7.27875	7.26951	6.95231	7.08991	7.11727	7.50243	7.62221	7.54407	7.233	7.20952	7.21219		acetyltransferase activity;catalytic activity;N-acetyltransferase activity;N-acyltransferase activity;transferase activity;transferase activity, transferring acyl groups;transferase activity, transferring acyl groups other than amino-acyl groups						+	1.75001	-0.685681	+	3.14977	-1.12282
Q2FYL3	SAOUHSC_01427	Probable CtpA-like serine protease	0	0	0	0	0	0	6.60256	0	0	0	0	0	6.51054	6.5302	0	0	0	0
Q2FYL1	SAOUHSC_01429	UPF0346 protein SAOUHSC_01429	9.08636	9.05308	9.02119	8.96988	8.95713	8.90956	9.02119	9.1038	9.08279	9.10721	9.15836	9.08279	9.21219	9.24055	9.26717	9.15229	9.12057	9.13354					+	1.83156	-0.358836				+	2.32809	-0.347149
Q2FYL0	SAOUHSC_01430	Phosphotransferase system enzyme IIA, putative	7.01703	7	6.993	0	0	0	6.87332	6.94101	0	0	0	0	0	0	0	0	0	0
Q2FYK7	SAOUHSC_01433	Uncharacterized protein	7.49969	7.54654	7.54158	7.30103	7.37291	6.85126	7.47422	7.4609	7.46835	7.41162	7.4609	7.45179	7.38021	7.45788	7.39093	7.47129	7.49969	7.47276		binding;lipid binding									+	1.29067	0.237747
Q2FYK6	SAOUHSC_01434	Dihydrofolate reductase	7.33244	7.46982	7.43933	6.43476	0	0	7.45484	7.46389	7.49554	6.50243	6.81291	6.81757	7.32838	7.33244	7.43616	7.3962	7.43775	7.27646	amine biosynthetic process;amine metabolic process;aromatic compound biosynthetic process;biosynthetic process;carboxylic acid biosynthetic process;carboxylic acid metabolic process;cellular amine metabolic process;cellular amino acid biosynthetic process;cellular amino acid metabolic process;cellular aromatic compound metabolic process;cellular biosynthetic process;cellular ketone metabolic proc…	binding;catalytic activity;coenzyme binding;cofactor binding;dihydrofolate reductase activity;NADP binding;nucleotide binding;oxidoreductase activity;oxidoreductase activity, acting on the CH-NH group of donors;oxidoreductase activity, acting on the CH-NH group of donors, NAD or NADP as acceptor		Folate biosynthesis;One carbon pool by folate	+	3.83563	-2.94446	+	2.71456	-2.52619
Q2FYK5	thyA	Thymidylate synthase	0	0	0	0	7.93861	0	0	0	0	7.93349	8.04532	7.90902	0	0	0	7.97313	8.0086	7.88705	2'-deoxyribonucleotide biosynthetic process;2'-deoxyribonucleotide metabolic process;biosynthetic process;cellular biosynthetic process;cellular metabolic process;cellular nitrogen compound biosynthetic process;cellular nitrogen compound metabolic process;cellular process;deoxyribonucleoside monophosphate biosynthetic process;deoxyribonucleoside monophosphate metabolic process;deoxyribonucleoside…	5,10-methylenetetrahydrofolate-dependent methyltransferase activity;catalytic activity;methyltransferase activity;thymidylate synthase activity;transferase activity;transferase activity, transferring one-carbon groups	cell part;cytoplasm;intracellular part	One carbon pool by folate;Pyrimidine metabolism				+	3.19986	5.21268	+	2.85693	4.87364
Q2FYK4	SAOUHSC_01436	UPF0403 protein SAOUHSC_01436	7.22789	0	6.99564	0	0	0	7.30535	7.2833	7.26717	0	0	0	7.36549	7.31806	7.36922	7.03342	7.06446	7.04139								+	4.61871	-2.39792	+	4.06029	-1.01152
Q2FYK2	SAOUHSC_01438	Nfu_N domain-containing protein	6.52634	6.70157	6.61909	0	0	0	6.71517	6.63448	6.66464	0	6.61684	6.68215	0	6.62839	0	6.5832	6.65992	6.71012					+	1.29933	0.998811
Q2FYJ6	ebh	Extracellular matrix-binding protein ebh	7.52244	7.66276	7.38382	7.70757	7.71181	7.70415	7.44091	7.46389	7.38202	7.59329	7.56467	7.5977	8.25042	8.34635	8.19312	7.72346	7.76118	7.66652	multi-organism process;pathogenesis		cell part;integral to membrane;intrinsic to membrane;membrane;membrane part;plasma membrane					+	2.3841	0.519138	+	3.31744	-1.8146
Q2FYJ4	SAOUHSC_01450	Uncharacterized protein	0	0	0	0	0	0	0	0	0	0	0	0	0	6.21748	0	0	0	0
Q2FYJ3	tdcB	L-threonine dehydratase catabolic TdcB	0	0	0	0	0	0	0	0	0	0	7.59131	0	0	0	0	8.14301	8.2014	8.01284
Q2FYJ2	ald1	Alanine dehydrogenase 1	0	0	0	0	0	0	8.3032	8.3032	0	8.94596	9.26951	8.71433	8.60314	8.53908	8.06819	9.70157	9.83948	9.61384	alanine catabolic process;alanine metabolic process;amine catabolic process;amine metabolic process;carboxylic acid catabolic process;carboxylic acid metabolic process;catabolic process;cellular amine metabolic process;cellular amino acid catabolic process;cellular amino acid metabolic process;cellular catabolic process;cellular ketone metabolic process;cellular metabolic process;cellular nitroge…	alanine dehydrogenase activity;catalytic activity;oxidoreductase activity;oxidoreductase activity, acting on the CH-NH2 group of donors		Alanine, aspartate and glutamate metabolism;Taurine and hypotaurine metabolism							+	2.71964	4.36776
Q2FYJ1	SAOUHSC_01454	53EXOc domain-containing protein	7.54033	7.41996	7.45484	7.5092	7.54407	7.4609	7.57287	7.74507	7.65418	7.35411	7.42488	7.44404	7.93651	7.8848	7.89321	8.07555	7.99432	8.02531		binding;catalytic activity;DNA binding;hydrolase activity;hydrolase activity, acting on ester bonds;nuclease activity;nucleic acid binding						+	1.93184	-0.829472	+	1.94544	0.421502
Q2FYJ0	SAOUHSC_01455	Uncharacterized protein	0	0	0	0	0	0	7.06819	6.93399	6.84696	0	7.13328	0	6.90037	6.90037	0	7.1271	7.14301	7.07188
Q2FYI7	SAOUHSC_01459	Uncharacterized protein	0	0	0	0	0	0	6.83822	6.81491	0	6.8791	6.99739	6.79099	6.77232	6.72346	6.68485	7.04532	7.06819	7.01284											+	3.33515	1.04721
Q2FYI6	SAOUHSC_01460	THUMP domain-containing protein	0	0	0	0	0	0	0	0	0	0	0	0	0	6.79449	6.6981	6.74507	6.78032	0
Q2FYI5	gpsB	Cell cycle protein GpsB	0	0	0	0	0	0	0	0	0	0	0	7.83569	0	0	0	0	0	0
Q2FYI4	SAOUHSC_01463	UPF0398 protein SAOUHSC_01463	7.95279	8.07188	7.86806	8.09342	8.21748	8.22011	8.55991	8.51322	8.43136	8.6053	8.70757	8.63347	8.27875	8.21219	8.233	9.31175	9.24797	9.35793					+	1.37216	0.706778	+	1.41727	0.489271	+	5.04015	3.53644
Q2FYI0	SAOUHSC_01467	DD-transpeptidase	0	0	0	0	6.47855	0	0	0	0	0	0	0	0	0	0	0	0	0
Q2FYH9	SAOUHSC_01468	Uncharacterized protein	8.04922	8.03342	7.81491	7.84757	7.81954	7.64542	8.85431	8.65321	8.6946	7.85612	7.95134	7.902	9.11059	9.03342	8.78746	8.73957	8.53275	8.61278								+	3.6095	-2.76014	+	1.4179	-1.15865
Q2FYH7	SAOUHSC_01470	DnaB_2 domain-containing protein	0	0	0	0	0	0	6.83059	6.77232	6.84011	0	0	0	6.70329	0	6.63749	0	6.7796	0								+	2.62897	-1.50188
Q2FYH6	asnS	Asparagine--tRNA ligase	6.76118	7.08636	7.14922	7.11394	6.95521	0	7.09342	7.07188	7.11394	7.02938	7.08991	7	6.93146	7.09691	7.06446	6.90037	6.943	0
Q2FYH5	dinG	3-5 exonuclease DinG	6.68395	6.66181	6.71684	0	0	0	6.99123	6.82413	6.92686	6.77379	6.716	6.86982	7.07918	7.02938	7.0569	7.02119	7.06819	6.95952
Q2FYH2	SAOUHSC_01480	TPR_REGION domain-containing protein	7.43457	7.46687	7.51322	7.23553	7.29003	7.24055	7.61805	7.50515	7.51054	7.31175	7.2833	7.37291	7.87332	7.89265	7.79657	7.77452	7.77815	7.716					+	2.77921	-0.718136	+	2.09475	-0.73722	+	1.29049	-0.32541
Q2FYH0	aroB	3-dehydroquinate synthase	7.42975	7.37291	7.36736	0	6.80139	0	7.58092	7.49554	7.52763	7.26245	7.36922	7.29003	7.84942	7.89487	7.76268	7.60959	7.60746	7.60531	amine biosynthetic process;amine metabolic process;aromatic amino acid family biosynthetic process;aromatic amino acid family metabolic process;aromatic compound biosynthetic process;biosynthetic process;carboxylic acid biosynthetic process;carboxylic acid metabolic process;cellular amine metabolic process;cellular amino acid biosynthetic process;cellular amino acid metabolic process;cellular aro…	3-dehydroquinate synthase activity;carbon-oxygen lyase activity;carbon-oxygen lyase activity, acting on phosphates;catalytic activity;lyase activity	cell part;cytoplasm;intracellular part	Phenylalanine, tyrosine and tryptophan biosynthesis	+	2.63197	-2.72339	+	2.30461	-0.755626	+	2.37938	-0.758078
Q2FYG9	aroC	Chorismate synthase	9.53656	9.7364	9.82543	10.2695	10.301	10.0492	10.3598	10.3766	10.3997	10.2014	10.2625	10.1614	10.3838	10.29	10.4232	10.2095	10.2014	10.2253	amine biosynthetic process;amine metabolic process;aromatic amino acid family biosynthetic process;aromatic amino acid family metabolic process;aromatic compound biosynthetic process;biosynthetic process;carboxylic acid biosynthetic process;carboxylic acid metabolic process;cellular amine metabolic process;cellular amino acid biosynthetic process;cellular amino acid metabolic process;cellular aro…	carbon-oxygen lyase activity;carbon-oxygen lyase activity, acting on phosphates;catalytic activity;chorismate synthase activity;lyase activity		Phenylalanine, tyrosine and tryptophan biosynthesis	+	1.91639	1.68464	+	2.24261	-0.565689	+	1.72952	-0.51033
Q2FYG7	ndk	Nucleoside diphosphate kinase	6.62634	6.68124	6.67394	0	0	0	6.80346	6.67852	6.59439	0	0	0	6.90037	6.77379	6.81224	6.734	6.61384	6.54033	biosynthetic process;cellular biosynthetic process;cellular metabolic process;cellular nitrogen compound biosynthetic process;cellular nitrogen compound metabolic process;cellular process;CTP biosynthetic process;CTP metabolic process;GTP biosynthetic process;GTP metabolic process;heterocycle biosynthetic process;heterocycle metabolic process;metabolic process;nitrogen compound metabolic process;…	adenyl nucleotide binding;adenyl ribonucleotide binding;ATP binding;binding;catalytic activity;cation binding;ion binding;kinase activity;metal ion binding;nucleobase-containing compound kinase activity;nucleoside diphosphate kinase activity;nucleotide binding;phosphotransferase activity, phosphate group as acceptor;purine nucleotide binding;purine ribonucleoside triphosphate binding;purine ribon…	cell part;cytoplasm;intracellular part	Purine metabolism;Pyrimidine metabolism				+	1.84434	-1.45879	+	1.37421	-0.662423
Q2FYG6	SAOUHSC_01486	Heptaprenyl diphosphate syntase component II, putative	0	0	0	0	0	0	0	0	0	0	0	6.43775	0	0	0	0	0	0
Q2FYG5	SAOUHSC_01487	Menaquinone biosynthesis methyltransferase, putative	0	0	0	0	0	0	0	0	0	0	0	5.89042	0	0	0	0	0	0
Q2FYG4	SAOUHSC_01488	Uncharacterized protein	0	0	0	0	0	0	0	0	0	0	0	0	0	6.4609	0	6.55509	0	0
Q2FYG2	SAOUHSC_01490	DNA-binding protein HU, putative	0	5.85733	5.86392	0	0	0	0	0	0	0	5.95624	0	0	0	0	0	0	0
Q2FYG1	gpsA	Glycerol-3-phosphate dehydrogenase [NAD(P)+]	7.75205	7.80754	7.83187	7.6721	7.79379	7.58883	7.59439	7.52114	7.5966	7.86273	7.86688	7.85248	7.1038	7.4183	7.3927	7.734	7.78533	7.79379	alcohol biosynthetic process;alcohol catabolic process;alcohol metabolic process;alditol biosynthetic process;alditol catabolic process;alditol metabolic process;biosynthetic process;carbohydrate biosynthetic process;carbohydrate catabolic process;carbohydrate metabolic process;catabolic process;cellular biosynthetic process;cellular carbohydrate biosynthetic process;cellular carbohydrate catabol…	binding;catalytic activity;coenzyme binding;cofactor binding;glycerol-3-phosphate dehydrogenase [NAD(P)+] activity;glycerol-3-phosphate dehydrogenase [NAD+] activity;NAD binding;nucleotide binding;oxidoreductase activity;oxidoreductase activity, acting on CH-OH group of donors;oxidoreductase activity, acting on the CH-OH group of donors, NAD or NADP as acceptor	cell part;cytoplasmic part;glycerol-3-phosphate dehydrogenase complex;intracellular part;macromolecular complex;protein complex	Glycerophospholipid metabolism				+	3.48999	0.963312	+	1.9806	1.54837
Q2FYG0	der	GTPase Der	7.549	7.51851	7.52114	0	7.33638	0	7.28556	7.21219	7.21219	7.54158	7.55509	7.52114	6.9196	7.02119	7.17898	7.39967	7.42975	7.43297	cellular component biogenesis;cellular component biogenesis at cellular level;cellular component organization or biogenesis;cellular component organization or biogenesis at cellular level;cellular process;ribonucleoprotein complex biogenesis;ribosome biogenesis	binding;GTP binding;guanyl nucleotide binding;guanyl ribonucleotide binding;nucleotide binding;purine nucleotide binding;purine ribonucleoside triphosphate binding;purine ribonucleotide binding;ribonucleotide binding			+	1.3619	-1.87961	+	3.48251	1.0053	+	2.12499	1.26524
Q2FYF9	SAOUHSC_01493	30S ribosomal protein S1, putative	6.96047	6.80889	6.79727	0	0	6.92007	6.79379	6.82543	6.76567	0	0	6.75815	6.66745	6.72099	6.78462	6.75128	0	0
Q2FYF5	SAOUHSC_01496	Cytidine monophosphate kinase	0	0	0	0	0	0	0	0	0	0	0	0	0	0	0	6.45484	6.64246	6.53148
Q2FYF4	SAOUHSC_01497	L-asparaginase, putative	7.25295	0	0	0	0	0	7.58995	7.63749	7.53148	0	7.16256	7.10037	7.7332	7.82543	7.86392	7.96426	7.9987	7.92012	amine metabolic process;carboxylic acid metabolic process;cellular amine metabolic process;cellular amino acid metabolic process;cellular ketone metabolic process;cellular metabolic process;cellular nitrogen compound metabolic process;cellular process;metabolic process;nitrogen compound metabolic process;organic acid metabolic process;oxoacid metabolic process;primary metabolic process;small mole…	asparaginase activity;catalytic activity;hydrolase activity;hydrolase activity, acting on carbon-nitrogen (but not peptide) bonds;hydrolase activity, acting on carbon-nitrogen (but not peptide) bonds, in linear amides		Alanine, aspartate and glutamate metabolism;Cyanoamino acid metabolism;Nitrogen metabolism				+	2.04526	-1.89186	+	1.57001	0.509958
Q2FYF3	SAOUHSC_01499	Uncharacterized protein	0	0	0	0	0	0	0	0	0	0	0	0	0	0	0	7.43297	7.51054	7.43616
Q2FYF1	ebpS	Elastin-binding protein EbpS	0	0	0	0	0	0	0	0	8.1896	0	0	0	0	0	0	0	0	0
Q2FYE8	SAOUHSC_01504	Ferredoxin, putative	7.17898	0	7.29447	0	0	0	0	0	6.96062	0	0	0	0	0	0	0	0	0
Q2FYE5;Q2FYE2	SAOUHSC_01508	Uncharacterized protein	0	0	6.13805	0	0	0	0	0	0	0	0	0	0	0	0	0	0	0
Q2FY89	SAOUHSC_01575	Helix-turn-helix domain protein	6.78533	6.79657	6.77815	0	0	6.67815	0	6.62491	0	6.8537	6.73078	6.80072	6.65992	6.64444	6.64444	6.80686	6.7185	6.73159		binding;DNA binding;nucleic acid binding;sequence-specific DNA binding			+	1.54015	-0.867825				+	1.66867	0.341223
Q2FY84	SAOUHSC_01580	Phi PVL ORF 30-like protein	7.40483	7.46389	7.37475	0	0	7.35553	7.43616	7.36549	7.34439	7.44248	7.36361	7.40483	7.49831	7.58092	7.46687	7.33445	7.2833	7.2878											+	2.31784	-0.709283
Q2FY81	SAOUHSC_01584	Uncharacterized protein	0	0	0	0	0	0	0	0	0	0	0	0	0	0	0	6.21748	0	0
Q2FY80	srrB	Sensor protein SrrB	8.93752	8.96802	9.02119	8.81023	8.89982	8.96988	8.9619	8.98408	8.98227	8.98091	8.99651	8.993	9.05308	9.0899	9.08279	8.95182	8.83948	8.90633		adenyl nucleotide binding;adenyl ribonucleotide binding;ATP binding;binding;catalytic activity;kinase activity;molecular transducer activity;nucleotide binding;phosphotransferase activity, alcohol group as acceptor;phosphotransferase activity, nitrogenous group as acceptor;protein histidine kinase activity;protein kinase activity;purine nucleotide binding;purine ribonucleoside triphosphate bindin…	cell part;integral to membrane;intrinsic to membrane;membrane;membrane part;plasma membrane	Two-component system							+	2.1559	-0.584806
Q2FY79	srrA	Transcriptional regulatory protein SrrA	7.99564	7.88986	7.87852	0	0	0	7.80003	7.87737	7.7796	0	0	0	7.44716	7.5302	7.62737	7.80956	7.89154	7.77743	biological regulation;biosynthetic process;cellular biosynthetic process;cellular macromolecule biosynthetic process;cellular macromolecule metabolic process;cellular metabolic process;cellular nitrogen compound metabolic process;cellular process;cellular response to stimulus;macromolecule biosynthetic process;macromolecule metabolic process;metabolic process;nitrogen compound metabolic process;n…	binding;DNA binding;nucleic acid binding	cell part;cytoplasm;intracellular part	Two-component system	+	2.91869	-3.58377	+	3.04585	-4.63576	+	2.02614	0.967567
Q2FY78	SAOUHSC_01587	Pseudouridine synthase	8.63548	8.64246	8.59329	8.57634	8.5563	8.59988	8.3032	8.32015	8.32222	8.16137	8.2014	8.27416	8.13033	8.21748	8.22011	7.7356	7.79796	7.80072	cellular macromolecule metabolic process;cellular metabolic process;cellular nitrogen compound metabolic process;cellular process;macromolecule metabolic process;macromolecule modification;metabolic process;nitrogen compound metabolic process;nucleic acid metabolic process;nucleobase-containing compound metabolic process;primary metabolic process;pseudouridine synthesis;RNA metabolic process;RNA …	binding;catalytic activity;intramolecular transferase activity;isomerase activity;lyase activity;nucleic acid binding;pseudouridine synthase activity;RNA binding						+	1.42653	-0.341759	+	3.45789	-1.36603
Q2FY77	scpB	Segregation and condensation protein B	8.82672	8.79309	8.78675	9.37658	9.38917	9.1038	9.25768	9.21484	9.27875	9.11394	9.23045	9.11394	9.33846	9.22531	9.27875	9.3483	9.24551	9.3075	biosynthetic process;cell cycle process;cell division;cellular biosynthetic process;cellular macromolecule biosynthetic process;cellular macromolecule metabolic process;cellular metabolic process;cellular nitrogen compound metabolic process;cellular process;chromosome separation;DNA metabolic process;DNA replication;macromolecule biosynthetic process;macromolecule metabolic process;metabolic proc…		cell part;cytoplasm;intracellular part		+	2.18378	1.61997
Q2FY76	scpA	Segregation and condensation protein A	7.95856	7.92737	7.96614	7.79169	7.86392	7.94645	8.15534	8.08279	8.13354	7.88762	7.94939	7.96895	7.87622	7.98677	7.92273	7.92942	7.91751	7.9652	biosynthetic process;cell cycle;cell division;cellular biosynthetic process;cellular macromolecule biosynthetic process;cellular macromolecule metabolic process;cellular metabolic process;cellular nitrogen compound metabolic process;cellular process;chromosome segregation;DNA metabolic process;DNA replication;macromolecule biosynthetic process;macromolecule metabolic process;metabolic process;nit…		cell part;cytoplasm;intracellular part					+	2.35284	-0.626408
Q2FY74	xerD	Tyrosine recombinase XerD	7.15534	7.04139	7.02938	0	0	0	6.96379	6.98945	6.93146	0	0	0	6.95569	6.92117	7.02531	6.99123	6.97081	7.03342	cell cycle;cell division;cellular macromolecule metabolic process;cellular metabolic process;cellular nitrogen compound metabolic process;cellular process;chromosome segregation;DNA metabolic process;DNA recombination;macromolecule metabolic process;metabolic process;nitrogen compound metabolic process;nucleic acid metabolic process;nucleobase-containing compound metabolic process;primary metabol…	binding;catalytic activity;DNA binding;integrase activity;nucleic acid binding;site-specific recombinase activity;tyrosine-based site-specific recombinase activity	cell part;cytoplasm;intracellular part		+	2.41073	-1.67272	+	1.30881	-1.2135
Q2FY73	SAOUHSC_01592	Transcriptional regulator, Fur, putative	0	0	0	0	0	0	0	0	0	0	5.93737	0	0	0	0	0	0	0
Q2FY72	SAOUHSC_01593	NUDIX domain protein	6.33244	6.52634	6.53148	0	0	0	0	6.48572	6.53275	0	0	0	0	0	0	0	0	0
Q2FY71	SAOUHSC_01594	Aldo_ket_red domain-containing protein	0	0	0	0	0	0	0	0	0	0	6.62161	0	0	0	0	0	0	0
Q2FY68	proC	Pyrroline-5-carboxylate reductase	8.83251	8.77815	8.79588	8.41996	8.4609	8.61172	8.4014	8.39794	8.39445	8.26717	8.26482	8.29667	8.43616	8.48572	8.43457	8.48855	8.4609	8.43775	amine biosynthetic process;amine metabolic process;biosynthetic process;carboxylic acid biosynthetic process;carboxylic acid metabolic process;cellular amine metabolic process;cellular amino acid biosynthetic process;cellular amino acid metabolic process;cellular biosynthetic process;cellular ketone metabolic process;cellular metabolic process;cellular nitrogen compound biosynthetic process;cellu…	catalytic activity;oxidoreductase activity;oxidoreductase activity, acting on the CH-NH group of donors;oxidoreductase activity, acting on the CH-NH group of donors, NAD or NADP as acceptor;pyrroline-5-carboxylate reductase activity	cell part;cytoplasm;intracellular part	Arginine and proline metabolism	+	2.13728	-1.01204	+	3.50931	-0.40432
Q2FY67	rnz	Ribonuclease Z	9.08636	9.21219	9.18752	9.78888	9.77232	9.59329	9.55871	9.51188	9.67117	9.71433	9.78604	9.69548	9.6561	9.64836	9.65321	9.76492	9.8109	9.87679		3'-tRNA processing endoribonuclease activity;binding;catalytic activity;cation binding;endonuclease activity;endonuclease activity, active with either ribo- or deoxyribonucleic acids and producing 5'-phosphomonoesters;endoribonuclease activity;endoribonuclease activity, producing 5'-phosphomonoesters;hydrolase activity;hydrolase activity, acting on ester bonds;ion binding;metal ion binding;nuclea…		RNA transport	+	2.78624	1.84745	+	1.29626	0.502816	+	2.14681	0.548065
Q2FY66	zwf	Glucose-6-phosphate 1-dehydrogenase	7.75511	7.7332	7.74194	0	7.54777	7.98	7.73239	7.75205	7.75511	7.75664	7.79934	7.88536	7.69636	7.77159	7.82607	7.93852	7.85309	7.85733	alcohol catabolic process;alcohol metabolic process;carbohydrate catabolic process;carbohydrate metabolic process;catabolic process;cellular carbohydrate catabolic process;cellular carbohydrate metabolic process;cellular metabolic process;cellular nitrogen compound metabolic process;cellular process;coenzyme metabolic process;cofactor metabolic process;glucose catabolic process;glucose metabolic …	binding;catalytic activity;coenzyme binding;cofactor binding;glucose-6-phosphate dehydrogenase activity;NADP binding;nucleotide binding;oxidoreductase activity;oxidoreductase activity, acting on CH-OH group of donors;oxidoreductase activity, acting on the CH-OH group of donors, NAD or NADP as acceptor		Glutathione metabolism;Pentose phosphate pathway							+	1.18929	0.39301
Q2FY65	SAOUHSC_01600	HTH araC/xylS-type domain-containing protein	7.28556	7.24797	7.22011	6.97727	7.02938	0	7.3032	7.27184	7.27875	7.17319	7.13988	7.08279	7.23805	7.25768	7.3075	7.13354	7.04139	7.13988		binding;DNA binding;nucleic acid binding;nucleic acid binding transcription factor activity;sequence-specific DNA binding;sequence-specific DNA binding transcription factor activity			+	3.05151	-0.786386	+	2.25641	-0.507082	+	1.89467	-0.540821
Q2FY64	SAOUHSC_01601	Alpha-amylase	0	0	6.85982	0	0	0	6.87448	6.79309	6.89597	0	6.89429	6.83251	6.71767	6.75358	6.85854	6.72509	6.78462	0
Q2FY60	SAOUHSC_01605	6-phosphogluconate dehydrogenase, decarboxylating	8.03743	8.0899	0	0	0	0	8.57864	9	9.02938	9.15836	9.03342	9	9.05308	8.64836	8.95761	9.233	9.36736	8.78533
Q2FY59	SAOUHSC_01606	Peptidase T, putative	6.95569	6.92993	7	0	0	6.87589	6.76567	6.69461	6.71349	0	6.67448	0	6.70329	6.65896	6.77525	6.62325	6.60853	6.55751		aminopeptidase activity;catalytic activity;exopeptidase activity;hydrolase activity;metallopeptidase activity;peptidase activity;peptidase activity, acting on L-amino acid peptides									+	1.37848	-0.385587
Q2FY55	SAOUHSC_01610	UPF0403 protein SAOUHSC_01610	7.26007	7.25042	7.29667	0	7.2833	6.95521	7.14922	7.21219	7.15229	7.11727	7.30963	7.29667	7.11059	7.06446	7.13672	7.18469	7.04532	7.09342
Q2FY54	SAOUHSC_01611	Dihydrolipoamide acetyltransferase component of pyruvate dehydrogenase complex	0	0	5.83886	0	0	0	0	0	0	0	0	0	0	0	0	0	0	0
Q2FY53	SAOUHSC_01612	2-oxoisovalerate dehydrogenase, E1 component, beta subunit, putative	0	0	6.48687	0	0	0	0	0	0	0	0	0	0	6.46687	6.43616	0	0	0
Q2FY52	SAOUHSC_01613	2-oxoisovalerate dehydrogenase subunit alpha	0	0	6.21104	0	0	0	0	0	0	0	0	0	0	0	0	0	0	0
Q2FY51	SAOUHSC_01614	Dihydrolipoyl dehydrogenase	7.30535	7.26482	7.3483	0	0	0	7.24797	7.32428	6.99078	0	6.53877	7.15534	6.96988	6.95999	7.21219	6.50379	7.14301	0	biological regulation;cell redox homeostasis;cellular homeostasis;cellular process;homeostatic process;regulation of biological process;regulation of biological quality;regulation of cellular process	binding;catalytic activity;coenzyme binding;cofactor binding;dihydrolipoyl dehydrogenase activity;flavin adenine dinucleotide binding;oxidoreductase activity;oxidoreductase activity, acting on a sulfur group of donors;oxidoreductase activity, acting on a sulfur group of donors, NAD or NADP as acceptor;oxidoreductase activity, acting on NADH or NADPH		Citrate cycle (TCA cycle);Glycine, serine and threonine metabolism;Glycolysis / Gluconeogenesis;Pyruvate metabolism;Valine, leucine and isoleucine degradation	+	3.73754	-1.65223
Q2FY50	SAOUHSC_01615	DNA repair protein RecN	7.02938	7.01284	6.98182	0	0	0	6.7579	0	0	0	0	0	0	0	0	0	0	0
Q2FY49	argR	Arginine repressor	7.94448	7.91275	7.87967	8.17609	8.21219	8.18752	7.84136	7.72997	7.89487	7.78176	7.89597	7.84572	7.9248	7.81823	7.75358	7.99782	7.94792	8.00432	amine biosynthetic process;amine metabolic process;arginine biosynthetic process;arginine metabolic process;biosynthetic process;carboxylic acid biosynthetic process;carboxylic acid metabolic process;cellular amine metabolic process;cellular amino acid biosynthetic process;cellular amino acid metabolic process;cellular biosynthetic process;cellular component assembly;cellular component organizati…	amine binding;amino acid binding;arginine binding;binding;carboxylic acid binding;DNA binding;nucleic acid binding;nucleic acid binding transcription factor activity;sequence-specific DNA binding transcription factor activity	cell part;cytoplasm;intracellular part		+	3.69295	0.928915				+	1.33438	0.502125
Q2FY48	SAOUHSC_01618	Geranyltranstransferase, putative	0	0	6.09075	0	0	0	0	0	0	0	0	6.04532	0	0	0	0	6.17026	0
Q2FY47	xseB	Exodeoxyribonuclease 7 small subunit	6.38739	6.37658	6.38917	0	0	0	6.36549	6.34044	6.35025	0	0	0	0	0	0	0	0	0	catabolic process;cellular catabolic process;cellular macromolecule catabolic process;cellular macromolecule metabolic process;cellular metabolic process;cellular nitrogen compound metabolic process;cellular process;DNA catabolic process;DNA metabolic process;macromolecule catabolic process;macromolecule metabolic process;metabolic process;nitrogen compound metabolic process;nucleic acid metaboli…	catalytic activity;deoxyribonuclease activity;exodeoxyribonuclease activity;exodeoxyribonuclease activity, producing 5'-phosphomonoesters;exodeoxyribonuclease VII activity;exonuclease activity;exonuclease activity, active with either ribo- or deoxyribonucleic acids and producing 5'-phosphomonoesters;hydrolase activity;hydrolase activity, acting on ester bonds;nuclease activity	cell part;cytoplasm;exodeoxyribonuclease VII complex;intracellular part;macromolecular complex;protein complex	Mismatch repair	+	1.33628	0.612129	+	1.45117	0.400471
Q2FY46	xseA	Exodeoxyribonuclease 7 large subunit	0	0	6.53894	0	0	0	0	0	0	0	0	0	0	0	0	0	0	0
Q2FY45	nusB	Transcription antitermination protein NusB	8.19312	8.12385	8.12057	7.78247	8.04532	8.11059	8.08636	8.1038	8.02531	8.1271	8.13354	8.15229	8.33445	8.34044	8.24551	8.10037	8.07918	8.08636	biological regulation;biosynthetic process;cellular biosynthetic process;cellular macromolecule metabolic process;cellular metabolic process;cellular nitrogen compound metabolic process;cellular process;macromolecule metabolic process;metabolic process;nitrogen compound metabolic process;nucleic acid metabolic process;nucleobase-containing compound metabolic process;primary metabolic process;regu…	binding;nucleic acid binding;RNA binding						+	1.23801	0.218652	+	2.65123	-0.724733
Q2FY44	SAOUHSC_01622	Alkaline shock protein 23	7.00432	7.49831	7.3483	8.22531	8.25768	8.11059	7.47857	7.55267	7.52504	8.36736	8.44405	8.35793	7.49831	7.64836	7.71096	8.29885	8.41162	8.45637					+	2.40557	3.03695	+	4.82023	2.89346	+	3.21527	2.557
Q2FY43	SAOUHSC_01623	Biotin carboxylase	8.42813	8.39794	8.43933	0	0	0	8.54283	8.47422	8.60746	7.81291	7.87099	7.72997	8.57978	8.53403	8.69723	8.33041	8.34439	8.34439		acetyl-CoA carboxylase activity;adenyl nucleotide binding;adenyl ribonucleotide binding;ATP binding;binding;biotin carboxylase activity;catalytic activity;cation binding;CoA carboxylase activity;ion binding;ligase activity;ligase activity, forming carbon-carbon bonds;ligase activity, forming carbon-nitrogen bonds;metal ion binding;nucleotide binding;purine nucleotide binding;purine ribonucleoside…		Carbon fixation pathways in prokaryotes;Fatty acid biosynthesis;Propanoate metabolism;Pyruvate metabolism;Tetracycline biosynthesis	+	2.52971	-6.16325	+	3.71031	-2.44784	+	2.24638	-0.876813
Q2FY42	SAOUHSC_01624	Biotin carboxyl carrier protein of acetyl-CoA carboxylase	7.52634	7.56937	7.26482	0	0	7.34319	7.74194	7.54531	7.78247	7.5229	0	7.37475	7.78817	7.6721	7.6902	7.31387	7.34044	7.31387	biosynthetic process;carboxylic acid biosynthetic process;carboxylic acid metabolic process;cellular biosynthetic process;cellular ketone metabolic process;cellular lipid metabolic process;cellular metabolic process;cellular process;fatty acid biosynthetic process;fatty acid metabolic process;lipid biosynthetic process;lipid metabolic process;metabolic process;monocarboxylic acid metabolic proces…	acetyl-CoA carboxylase activity;catalytic activity;CoA carboxylase activity;ligase activity;ligase activity, forming carbon-carbon bonds	acetyl-CoA carboxylase complex;cell part;cytoplasmic part;intracellular part;macromolecular complex;protein complex	Fatty acid biosynthesis;Propanoate metabolism;Pyruvate metabolism;Tetracycline biosynthesis							+	3.35078	-1.30915
Q2FY41	efp	Elongation factor P	7.63144	7.57403	7.57519	0	0	0	7.66276	7.64836	7.68842	0	0	0	7.54777	7.49136	7.62325	7.17026	0	6.77379	biosynthetic process;cellular biosynthetic process;cellular metabolic process;cellular process;metabolic process;peptide biosynthetic process;peptide metabolic process	binding;nucleic acid binding;RNA binding;translation elongation factor activity;translation factor activity, nucleic acid binding	cell part;cytoplasm;intracellular part		+	4.05839	-3.36273	+	6.03604	-4.97348	+	1.63148	-2.51181
Q2FY40	SAOUHSC_01626	Proline dipeptidase, putative	9.31387	9.41162	9.30535	8.20951	8.34242	8.52634	9.83123	9.80003	9.85974	8.72997	8.86213	8.80003	9.98543	9.92169	9.90956	9.67943	9.5955	9.58546		binding;catalytic activity;cation binding;dipeptidase activity;exopeptidase activity;hydrolase activity;ion binding;metal ion binding;peptidase activity;peptidase activity, acting on L-amino acid peptides			+	3.25784	-3.2694	+	4.79461	-3.4314	+	2.95827	-1.0589
Q2FY39	SAOUHSC_01627	Uncharacterized protein	0	0	6.47445	0	0	0	0	6.52598	0	0	0	0	0	6.45788	6.5172	6.40312	6.58659	6.60746
Q2FY37	lipM	Octanoyltransferase LipM	8.04532	7.99078	8.02119	8.49136	8.6053	8.46538	8.77743	8.73719	8.82607	9.38202	9.47567	9.4609	8.33846	8.38202	8.63043	9.5172	9.63448	9.71684	biosynthetic process;carboxylic acid biosynthetic process;carboxylic acid metabolic process;cellular biosynthetic process;cellular ketone metabolic process;cellular lipid metabolic process;cellular macromolecule metabolic process;cellular metabolic process;cellular process;cellular protein metabolic process;coenzyme biosynthetic process;coenzyme metabolic process;cofactor biosynthetic process;cof…	catalytic activity;lipoyl(octanoyl) transferase activity;octanoyltransferase activity;transferase activity;transferase activity, transferring acyl groups;transferase activity, transferring acyl groups other than amino-acyl groups		Lipoic acid metabolism	+	3.40442	1.66623	+	4.15284	2.19014	+	3.39167	3.89508
Q2FY36	SAOUHSC_01630	Rhodanese domain-containing protein	8.23805	8.15229	8.1959	8.18469	8.18752	8.3075	8.26245	8.23553	8.18469	8.13033	8.20951	8.22789	8.03342	8.0607	8.07555	8.01703	8.04922	8.03743
Q2FY35	gcvPB	Probable glycine dehydrogenase (decarboxylating) subunit 2	0	0	0	0	0	0	0	0	0	0	0	5.38382	0	0	0	0	0	0
Q2FY34	gcvPA	Probable glycine dehydrogenase (decarboxylating) subunit 1	0	0	0	0	0	0	5.7796	0	0	0	0	0	0	0	0	0	0	0
Q2FY33	gcvT	Aminomethyltransferase	6.26951	6.4133	6.32015	0	0	0	6.5302	6.43297	6.47129	6.29226	6.29447	0	0	0	6.37658	0	0	0	amine catabolic process;amine metabolic process;carboxylic acid catabolic process;carboxylic acid metabolic process;catabolic process;cellular amine metabolic process;cellular amino acid catabolic process;cellular amino acid metabolic process;cellular catabolic process;cellular ketone metabolic process;cellular metabolic process;cellular nitrogen compound metabolic process;cellular process;glycin…	aminomethyltransferase activity;catalytic activity;methyltransferase activity;transaminase activity;transferase activity;transferase activity, transferring nitrogenous groups;transferase activity, transferring one-carbon groups		Glycine, serine and threonine metabolism;Nitrogen metabolism;One carbon pool by folate	+	1.2926	1.03261
Q2FY32	aroK	Shikimate kinase	6.9058	0	6.79239	0	0	0	6.94101	0	7.0086	0	0	0	6.72346	0	6.73719	0	0	0
Q2FY29	SAOUHSC_01644	Lactamase_B domain-containing protein	0	0	0	0	0	0	0	0	0	0	0	6.23553	0	0	0	0	0	0
Q2FY28	SAOUHSC_01645	Thiamine_BP domain-containing protein	0	0	0	0	0	0	0	0	6.42297	0	0	0	0	0	0	0	0	0
Q2FY27	SAOUHSC_01646	Glucokinase	0	0	0	0	0	0	0	0	0	7.35313	0	0	0	0	0	0	0	0
Q2FY25	SAOUHSC_01648	TPR_REGION domain-containing protein	7.70842	7.82866	7.78675	8.16435	7.71684	7.16137	7.23805	7.57287	7.09342	7.82217	7.75435	7.64542	8.10721	7.65514	8.15836	8.18469	7.92065	8.44405								+	1.35885	1.45899
Q2FY24	SAOUHSC_01649	Rhomboid family protein	7.734	7.6464	7.83948	7.96614	7.96802	7.96708	8.0086	7.99651	8.03342	8.00432	8.04139	7.93702	8.15229	8.17026	8.08279	7.90687	8.10037	8.07918		catalytic activity;endopeptidase activity;hydrolase activity;peptidase activity;peptidase activity, acting on L-amino acid peptides;serine hydrolase activity;serine-type endopeptidase activity;serine-type peptidase activity	cell part;integral to membrane;intrinsic to membrane;membrane part		+	1.81711	0.754472
Q2FY23	SAOUHSC_01650	5-formyltetrahydrofolate cyclo-ligase	0	0	0	0	0	0	0	0	0	0	0	0	0	6.37291	0	6.73159	6.79379	6.80889
Q2FY22	rpmG2	50S ribosomal protein L33 2	0	0	0	0	0	0	0	0	6.01005	0	0	0	0	0	0	0	0	0
Q2FY21	SAOUHSC_01652	Penicillin-binding protein 3	0	0	0	0	0	0	0	0	0	0	0	0	0	6.35218	0	0	0	0
Q2FY19	fur	Ferric uptake regulation protein	6.92634	6.86332	6.90255	0	0	0	6.78675	6.84136	6.88874	0	0	0	0	0	6.69285	0	0	0
Q2FY17	SAOUHSC_01657	ABC transporter, putative	0	0	0	0	0	0	0	0	0	0	0	6.26482	0	0	0	0	0	0
Q2FY16	nfo	Probable endonuclease 4	7.58883	7.734	7.76343	6.8893	7.62118	7.60531	7.81823	7.75205	7.75358	7.62531	7.66652	7.72916	7.70586	7.69197	7.75587	7.6637	7.70243	7.67486	cellular macromolecule metabolic process;cellular metabolic process;cellular nitrogen compound metabolic process;cellular process;cellular response to stimulus;cellular response to stress;DNA metabolic process;DNA repair;macromolecule metabolic process;metabolic process;nitrogen compound metabolic process;nucleic acid metabolic process;nucleobase-containing compound metabolic process;primary meta…	binding;catalytic activity;cation binding;deoxyribonuclease activity;deoxyribonuclease IV (phage-T4-induced) activity;DNA binding;endodeoxyribonuclease activity;endodeoxyribonuclease activity, producing 5'-phosphomonoesters;endonuclease activity;endonuclease activity, active with either ribo- or deoxyribonucleic acids and producing 5'-phosphomonoesters;hydrolase activity;hydrolase activity, actin…		Base excision repair				+	1.27161	-0.335362
Q2FY15	cshB	DEAD-box ATP-dependent RNA helicase CshB	7.19033	7.20683	7.17609	0	0	0	7.20683	7.21484	7.16732	7.16435	7.27416	7.20412	7.25768	7.22272	7.24304	7.04532	7.04139	7.16435	catabolic process;cellular catabolic process;cellular macromolecule catabolic process;cellular macromolecule metabolic process;cellular metabolic process;cellular nitrogen compound metabolic process;cellular process;macromolecule catabolic process;macromolecule metabolic process;metabolic process;nitrogen compound metabolic process;nucleic acid metabolic process;nucleobase-containing compound met…	adenyl nucleotide binding;adenyl ribonucleotide binding;ATP binding;ATPase activity;ATPase activity, coupled;ATP-dependent helicase activity;ATP-dependent RNA helicase activity;binding;catalytic activity;helicase activity;hydrolase activity;hydrolase activity, acting on acid anhydrides;hydrolase activity, acting on acid anhydrides, in phosphorus-containing anhydrides;nucleic acid binding;nucleosi…	cell part;cytoplasm;intracellular part		+	3.01711	-1.20652				+	1.71321	-0.523053
Q2FY14	SAOUHSC_01660	GTP cyclohydrolase 1 type 2 homolog	5.86638	0	0	0	0	0	0	0	0	0	0	0	0	0	0	0	0	0
Q2FY13	SAOUHSC_01661	Uncharacterized protein	7.77743	7.73799	7.83187	7.76268	7.65801	7.9248	7.86747	7.85187	7.83251	7.76938	7.70157	7.78817	8.17898	8.17898	8.0569	7.90956	7.83569	7.8657		catalytic activity;methyltransferase activity;RNA methyltransferase activity;S-adenosylmethionine-dependent methyltransferase activity;transferase activity;transferase activity, transferring one-carbon groups;tRNA (adenine) methyltransferase activity;tRNA (adenine-N1-)-methyltransferase activity;tRNA methyltransferase activity						+	1.58927	-0.324145	+	2.36411	-0.890184
Q2FY11	dnaG	DNA primase	6.78032	0	6.7185	0	0	0	6.68574	0	6.75664	0	0	0	6.66839	0	0	0	0	0
Q2FY10	SAOUHSC_01664	Putative pyruvate, phosphate dikinase regulatory protein	8.3962	8.25768	8.27646	8.17319	8.22011	8.15534	8.36922	8.35603	8.3032	8.39445	8.47276	8.40654	8.24304	8.25527	8.22531	8.47129	8.44091	8.48287	cellular macromolecule metabolic process;cellular metabolic process;cellular process;cellular protein metabolic process;dephosphorylation;macromolecule metabolic process;macromolecule modification;metabolic process;phosphate-containing compound metabolic process;phosphorus metabolic process;primary metabolic process;protein dephosphorylation;protein metabolic process;protein modification process	adenyl nucleotide binding;adenyl ribonucleotide binding;ADP binding;ATP binding;binding;catalytic activity;kinase activity;nucleotide binding;phosphotransferase activity, alcohol group as acceptor;phosphotransferase activity, phosphate group as acceptor;protein kinase activity;protein serine/threonine kinase activity;purine nucleotide binding;purine ribonucleoside triphosphate binding;purine ribo…			+	1.25751	-0.42267	+	1.21547	0.271634	+	3.90291	0.743507
Q2FY08	glyQS	Glycine--tRNA ligase	0	0	5.89397	0	0	0	0	0	0	0	0	0	0	0	0	0	0	0
Q2FY06	era	GTPase Era	0	6.4456	6.44091	0	0	0	0	0	0	0	0	0	0	6.31387	0	0	0	0
Q2FY04	SAOUHSC_01670	Cytidine deaminase	7.96895	7.9284	7.91381	7.83123	7.90037	7.85126	7.83251	7.85854	7.78888	7.99344	7.98453	8.03342	7.64147	7.7185	7.83442	7.69897	7.68485	7.66464		binding;catalytic activity;cation binding;cytidine deaminase activity;deaminase activity;hydrolase activity;hydrolase activity, acting on carbon-nitrogen (but not peptide) bonds;hydrolase activity, acting on carbon-nitrogen (but not peptide) bonds, in cyclic amidines;ion binding;metal ion binding;transition metal ion binding;zinc ion binding		Drug metabolism - other enzymes;Pyrimidine metabolism	+	1.35059	-0.252803	+	2.66093	0.588498
Q2FY02	ybeY	Endoribonuclease YbeY	0	0	0	0	0	0	6.61653	0	0	0	0	0	6.62221	6.67394	0	7.21219	7.18752	7.07918	cellular macromolecule metabolic process;cellular metabolic process;cellular nitrogen compound metabolic process;cellular process;macromolecule metabolic process;metabolic process;ncRNA metabolic process;ncRNA processing;nitrogen compound metabolic process;nucleic acid metabolic process;nucleobase-containing compound metabolic process;primary metabolic process;RNA metabolic process;RNA processing…	binding;catalytic activity;cation binding;endonuclease activity;endopeptidase activity;endoribonuclease activity;hydrolase activity;hydrolase activity, acting on ester bonds;ion binding;metal ion binding;metalloendopeptidase activity;metallopeptidase activity;nuclease activity;peptidase activity;peptidase activity, acting on L-amino acid peptides;ribonuclease activity;transition metal ion binding…	cell part;cytoplasm;intracellular part								+	2.50585	1.97357
Q2FY01	SAOUHSC_01673	PhoH domain-containing protein	0	0	0	0	0	0	0	0	0	0	0	0	0	0	0	7.21484	0	0
Q2FY00	SAOUHSC_01675	Uncharacterized protein	0	0	0	0	0	0	0	0	6.09022	0	0	0	0	0	0	0	0	0
Q2FXZ9	SAOUHSC_01676	UPF0365 protein SAOUHSC_01676	8.42813	8.33445	8.38202	8.38917	8.35025	8.31175	8.3032	8.2878	8.29226	8.43775	8.45025	8.44871	8.19033	8.21748	8.21219	8.02938	8.11727	8.0899			cell part;integral to membrane;intrinsic to membrane;membrane;membrane part;plasma membrane					+	4.82196	0.502111	+	2.02731	-0.42459
Q2FXZ8	SAOUHSC_01677	NfeD domain-containing protein	7.90848	7.943	7.98046	7.74036	7.75205	7.74819	7.51188	7.52244	7.52375	7.77012	7.74272	7.7767	7.32634	7.37475	7.4843	7.04922	7.21484	7.16732					+	3.13885	-0.6548	+	4.601	0.809961	+	1.68222	-0.834917
Q2FXZ7	rpsU	30S ribosomal protein S21	7.7185	7.81157	7.68664	8.4624	8.52634	8.40312	8.09691	7.99913	8.04139	8.68574	8.7364	8.6561	7.92376	7.95617	8.15229	8.51054	8.62014	8.65225	biosynthetic process;cellular biosynthetic process;cellular macromolecule biosynthetic process;cellular macromolecule metabolic process;cellular metabolic process;cellular process;cellular protein metabolic process;macromolecule biosynthetic process;macromolecule metabolic process;metabolic process;primary metabolic process;protein metabolic process;translation	structural constituent of ribosome;structural molecule activity	cell part;cytoplasmic part;intracellular non-membrane-bounded organelle;intracellular organelle;intracellular part;macromolecular complex;non-membrane-bounded organelle;organelle;ribonucleoprotein complex;ribosome	Ribosome	+	3.82463	2.40856	+	4.21315	2.14907	+	2.66072	1.93858
Q2FXZ6	SAOUHSC_01679	Uncharacterized protein	6.91645	7.04532	7.15836	6.97405	6.97955	7.11727	6.67669	6.62634	6.69984	0	0	0	6.69723	6.71933	6.60959	0	0	0	cellular macromolecule metabolic process;cellular metabolic process;cellular nitrogen compound metabolic process;cellular process;macromolecule metabolic process;macromolecule modification;metabolic process;nitrogen compound metabolic process;nucleic acid metabolic process;nucleobase-containing compound metabolic process;primary metabolic process;RNA metabolic process;RNA modification	4 iron, 4 sulfur cluster binding;binding;catalytic activity;iron-sulfur cluster binding;metal cluster binding;transferase activity						+	2.41028	-0.919137
Q2FXZ5	SAOUHSC_01680	Ribosomal RNA small subunit methyltransferase E	7.6149	7.66087	7.62325	7.51322	7.49276	7.53908	7.66932	7.70329	7.6561	7.617	7.56229	7.60959	7.72754	7.82672	8.07918	7.62428	7.58092	7.54531	cellular macromolecule metabolic process;cellular metabolic process;cellular nitrogen compound metabolic process;cellular process;macromolecule metabolic process;metabolic process;ncRNA metabolic process;ncRNA processing;nitrogen compound metabolic process;nucleic acid metabolic process;nucleobase-containing compound metabolic process;primary metabolic process;RNA metabolic process;RNA processing…	catalytic activity;methyltransferase activity;transferase activity;transferase activity, transferring one-carbon groups	cell part;cytoplasm;intracellular part		+	2.42592	-0.391941	+	1.64554	-0.265554	+	1.28794	-0.977677
Q2FXZ4	prmA	Ribosomal protein L11 methyltransferase	0	0	0	0	0	0	0	0	0	0	0	0	0	0	0	6.4183	0	0
Q2FXZ3	dnaJ	Chaperone protein DnaJ	0	0	0	0	0	7.07225	0	0	0	0	0	0	0	0	0	0	0	0
Q2FXZ2	dnaK	Chaperone protein DnaK	7.45179	7.31387	7.37658	7.31806	7.32015	7.40654	7.57403	7.53782	7.53656	7.47712	7.4183	7.45788	7.47276	7.49693	7.51322	7.35411	7.4609	7.47712	cellular macromolecule metabolic process;cellular metabolic process;cellular process;cellular protein metabolic process;macromolecule metabolic process;metabolic process;primary metabolic process;protein folding;protein metabolic process	adenyl nucleotide binding;adenyl ribonucleotide binding;ATP binding;binding;nucleotide binding;purine nucleotide binding;purine ribonucleoside triphosphate binding;purine ribonucleotide binding;ribonucleotide binding		ko05152;RNA degradation				+	2.0095	-0.326772
Q2FXZ1	grpE	Protein GrpE	9.07555	8.91169	8.94645	8.90472	8.97405	9.01284	8.83822	8.83442	8.88138	8.80754	8.80754	8.80686	8.96567	9.0569	8.99344	8.58206	8.63649	8.61595	cellular macromolecule metabolic process;cellular metabolic process;cellular process;cellular protein metabolic process;macromolecule metabolic process;metabolic process;primary metabolic process;protein folding;protein metabolic process	adenyl nucleotide binding;adenyl-nucleotide exchange factor activity;ATPase regulator activity;binding;enzyme regulator activity;nucleoside-triphosphatase regulator activity;nucleotide binding;purine nucleotide binding	cell part;cytoplasm;intracellular part					+	1.36546	-0.146272	+	3.63803	-1.3083
Q2FXY7	lepA	Elongation factor 4	0	0	0	0	0	0	0	0	0	0	0	0	0	6.52634	0	6.24055	0	0
[truncated: 584 more rows]
